# Supplementary material for: Au nanoparticle-catalyzed double hydrosilylation of nitriles by diethylsilane
Source: Royal Society of Chemistry journal article supplement (doi:10.1039/d4ob00534a), 2024-01-01

## SUPPORTING INFORMATION

### **Au Nanoparticle-Catalyzed Double Hydrosilylation of Nitriles by Diethylsilane**

Maria Ioanna Karapanou, Dimitra Malliotaki and Manolis Stratakis\*

*Department of Chemistry, University of Crete, Voutes 71003 Heraklion, Greece*

[stratakis@uoc.gr](mailto:stratakis@uoc.gr)

#### **Table of contents**

|        |                                                                                              |
|--------|----------------------------------------------------------------------------------------------|
| S2-S6  | Synthesized nitriles used in this study and their spectroscopic data                         |
| S7-S49 | Copies of $^1\text{H}$ and $^{13}\text{C}$ NMR spectra of synthesized reactants and products |

## Nitriles used in this study

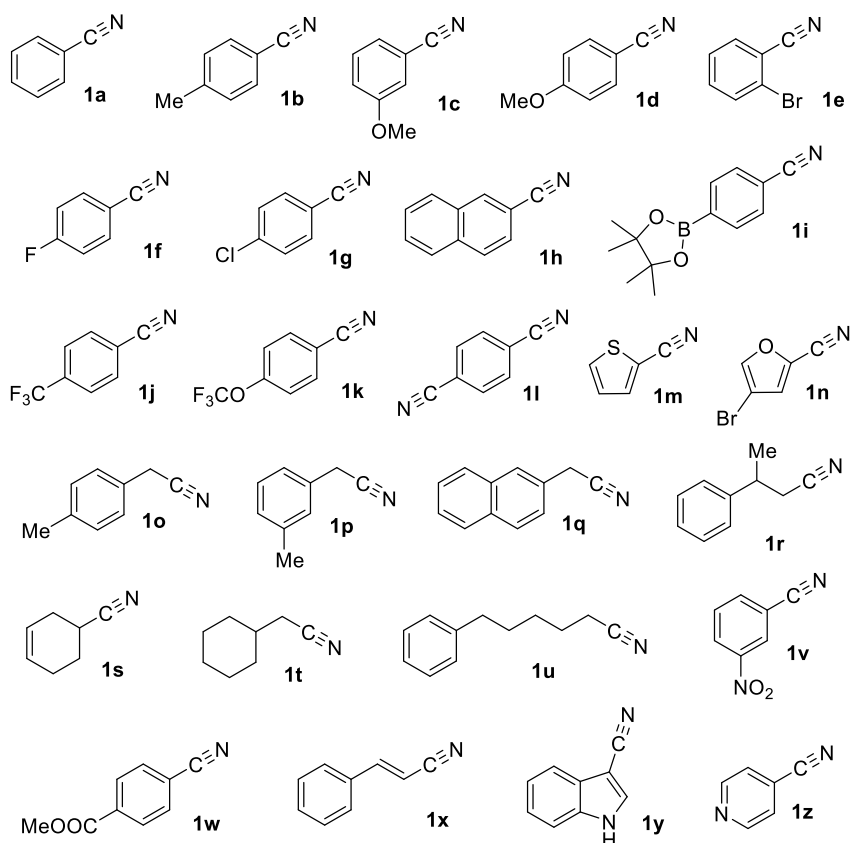

Apart from **1a**, **1i-1l**, **1o-1q** and **1y-1z** which were obtained from commercial suppliers, all aryl or heteroaryl nitriles were prepared from the corresponding aldehydes via the triflic acid-mediated Schmidt reaction,<sup>1</sup> while the alkyl ones via treatment of the aldehydes with hydroxylamine hydrochloride in DMSO,<sup>2</sup> as shown schematically below:

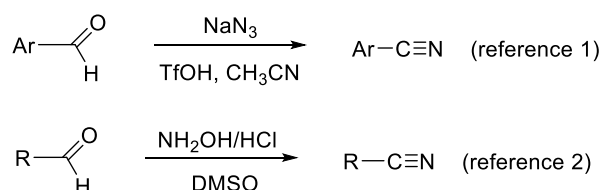

## Spectroscopic data of synthesized nitriles

4-Methylbenzonitrile (**1b**)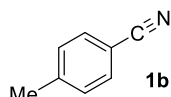

Colorless oil (105 mg, 78% yield). Its spectroscopic data are in agreement with those of the commercially available substance. <sup>1</sup>H NMR (500 MHz, CDCl<sub>3</sub>): 7.54 (d, *J* = 8.0 Hz, 2H),

7.27 (d,  $J = 8.0$  Hz, 2H), 2.42 (s, 3H).  $^{13}\text{C}$  NMR (125 MHz,  $\text{CDCl}_3$ ): 143.7, 132.0, 129.8, 119.1, 109.3, 21.8.

### 3-Methoxybenzonitrile (1c)

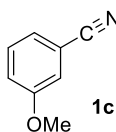

Colorless oil (130 mg, 83% yield). Its spectroscopic data are in agreement with those of the commercially available substance.  $^1\text{H}$  NMR (500 MHz,  $\text{CDCl}_3$ ): 7.39-7.35 (m, 1H), 7.25-7.23 (m, 1H), 7.14-7.12 (m, 2H), 3.83 (s, 3H).  $^{13}\text{C}$  NMR (125 MHz,  $\text{CDCl}_3$ ): 159.6, 130.3, 124.5, 119.3, 118.7, 116.8, 113.2, 55.5.

### 4-Methoxybenzonitrile (1d)

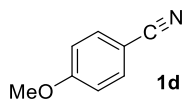

White solid (200 mg, 91% yield). Its spectroscopic data are in agreement with those of the commercially available substance.  $^1\text{H}$  NMR (500 MHz,  $\text{CDCl}_3$ ): 7.57 (d,  $J = 9.0$  Hz, 2H), 6.94 (d,  $J = 9.0$  Hz, 2H), 3.84 (s, 3H).  $^{13}\text{C}$  NMR (125 MHz,  $\text{CDCl}_3$ ): 162.7, 133.7, 119.0, 114.6, 103.7, 55.4.

### 2-Bromobenzonitrile (1e)

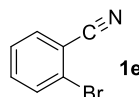

White solid (56 mg, 45% yield). Its spectroscopic data are in agreement with those of the commercially available substance.  $^1\text{H}$  NMR (500 MHz,  $\text{CDCl}_3$ ): 7.70-7.66 (m, 2H), 7.48-7.41 (m, 2H).  $^{13}\text{C}$  NMR (125 MHz,  $\text{CDCl}_3$ ): 134.3, 133.9, 133.2, 127.6, 125.3, 117.1, 115.9.

### 4-Fluorobenzonitrile (1f)

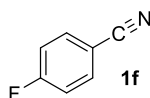

White solid (63 mg, 48% yield). Its spectroscopic data are in agreement with those of the commercially available substance.  $^1\text{H}$  NMR (500 MHz,  $\text{CDCl}_3$ ): 7.70-7.66 (m, 2H), 7.20-7.16 (m, 2H).  $^{13}\text{C}$  NMR (125 MHz,  $\text{CDCl}_3$ ): 165.0 (d,  $J_{\text{C-F}} = 256.5$  Hz), 134.7 (d,  $J_{\text{C-F}} = 9.5$  Hz), 118.0, 116.9 (d,  $J_{\text{C-F}} = 22.0$  Hz), 108.6 (d,  $J_{\text{C-F}} = 3.5$  Hz).

**4-Chlorobenzonitrile (1g)**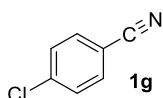

White solid (143 mg, 73% yield). Its spectroscopic data are in agreement with those of the commercially available substance.  $^1\text{H}$  NMR (500 MHz,  $\text{CDCl}_3$ ): 7.60 (d,  $J = 8.5$  Hz, 2H), 7.47 (d,  $J = 8.5$  Hz, 2H).  $^{13}\text{C}$  NMR (125 MHz,  $\text{CDCl}_3$ ): 139.6, 133.4, 129.7, 117.9, 110.8.

**2-Naphthonitrile (1h)**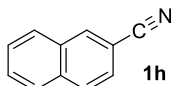

White solid (81 mg, 53% yield). Its spectroscopic data are in agreement with those of the commercially available substance.  $^1\text{H}$  NMR (500 MHz,  $\text{CDCl}_3$ ): 8.24 (s, 1H), 7.93-7.89 (m, 3H), 7.67-7.60 (m, 3H).  $^{13}\text{C}$  NMR (125 MHz,  $\text{CDCl}_3$ ): 134.6, 134.1, 132.2, 129.2, 129.0, 128.4, 128.0, 127.6, 126.3, 119.2, 109.4.

**Thiophene-2-carbonitrile (1m)**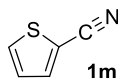

Yellow oil (66 mg, 57% yield). Its spectroscopic data are in agreement with those of the commercially available substance.  $^1\text{H}$  NMR (500 MHz,  $\text{CDCl}_3$ ): 7.64 (dd,  $J_1 = 3.5$  Hz,  $J_2 = 1.0$  Hz, 1H), 7.62 (dd,  $J_1 = 5.0$  Hz,  $J_2 = 1.0$  Hz, 1H), 7.14 (dd,  $J_1 = 5.0$  Hz,  $J_2 = 3.5$  Hz, 1H).  $^{13}\text{C}$  NMR (125 MHz,  $\text{CDCl}_3$ ): 137.4, 132.5, 127.6, 114.2, 109.9.

**3-Phenylbutanenitrile (1r)<sup>3</sup>**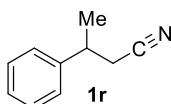

Colorless oil (105 mg, 72% yield).  $^1\text{H}$  NMR (500 MHz,  $\text{CDCl}_3$ ): 7.36 (t,  $J = 7.5$  Hz, 2H), 7.29-7.24 (m, 3H), 3.17 (m, 1H), 2.62 (dd,  $J_1 = 16.5$  Hz,  $J_2 = 6.5$  Hz, 1H), 2.55 (dd,  $J_1 = 16.5$  Hz,  $J_2 = 7.5$  Hz, 1H), 1.46 (d,  $J = 7.0$  Hz, 3H);  $^{13}\text{C}$  NMR (125 MHz,  $\text{CDCl}_3$ ): 143.1, 128.8, 127.3, 126.5, 118.5, 36.5, 26.3, 20.6.

**Cyclohex-3-ene-1-carbonitrile (1s)<sup>3</sup>**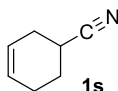

Colorless oil (72 mg, 53% yield).  $^1\text{H}$  NMR (500 MHz,  $\text{CDCl}_3$ ): 5.77-5.73 (m, 1H), 5.65-5.61 (m, 1H), 2.83-2.78 (m, 1H), 2.40-2.37 (m, 1H), 2.34-2.27 (m, 1H), 2.26-2.20 (m, 1H),

2.13-2.06 (m, 1H), 2.01-1.96 (m, 1H), 1.91-1.84 (m, 1H).  $^{13}\text{C}$  NMR (125 MHz,  $\text{CDCl}_3$ ): 127.0, 123.3, 122.4, 28.2, 25.3, 24.6, 22.9.

### 2-Cyclohexylacetonitrile (**1t**)<sup>4</sup>

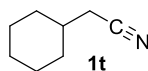

Colorless oil (105 mg, 49% yield).  $^1\text{H}$  NMR (500 MHz,  $\text{CDCl}_3$ ): 2.23 (d,  $J = 6.5$  Hz, 2H), 1.84-1.81 (m, 2H), 1.77-1.73 (m, 2H), 1.69-1.62 (m, 2H), 1.32-1.03 (m, 5H).  $^{13}\text{C}$  NMR (125 MHz,  $\text{CDCl}_3$ ): 118.9, 34.8, 32.4, 25.7, 25.6, 24.7.

### 6-Phenylhexanenitrile (**1u**)<sup>5</sup>

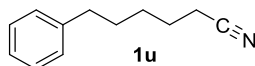

Colorless oil (142 mg, 52% yield).  $^1\text{H}$  NMR (500 MHz,  $\text{CDCl}_3$ ): 7.29 (t,  $J = 7.5$  Hz, 2H), 7.21-7.17 (m, 3H), 2.64 (t,  $J = 7.5$  Hz, 2H), 2.33 (t, 2H,  $J = 7.0$  Hz), 1.72-1.63 (m, 4H), 1.53-1.46 (m, 2H).  $^{13}\text{C}$  NMR (125 MHz,  $\text{CDCl}_3$ ): 142.0, 128.3 (2C), 125.8, 119.7, 35.5, 30.6, 28.2, 25.3, 17.1.

### 3-Nitrobenzonitrile (**1v**)

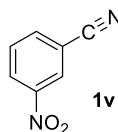

White solid (157 mg, 80% yield). Its spectroscopic data are in agreement with those of the commercially available substance.  $^1\text{H}$  NMR (500 MHz,  $\text{CDCl}_3$ ): 8.54 (t,  $J = 2.0$  Hz, 1H), 8.49-8.47 (m, 1H), 8.01-7.99 (m, 1H), 7.74 (t,  $J = 8.0$  Hz, 1H).  $^{13}\text{C}$  NMR (125 MHz,  $\text{CDCl}_3$ ): 148.2, 137.6, 130.6, 127.5, 127.2, 116.5, 114.1.

### Methyl 4-cyanobenzoate (**1w**)

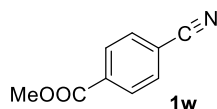

White solid (123 mg, 84% yield). Its spectroscopic data are in agreement with those of the commercially available substance.  $^1\text{H}$  NMR (500 MHz,  $\text{CDCl}_3$ ): 8.13 (d,  $J = 8.5$  Hz, 2H), 7.74 (d,  $J = 8.5$  Hz, 2H), 3.95 (s, 3H).  $^{13}\text{C}$  NMR (125 MHz,  $\text{CDCl}_3$ ): 165.4, 133.9, 132.2, 130.1, 117.9, 116.4, 52.7.

### Cinnamitrile (**1x**)

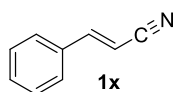

Colorless oil (121 mg, 92% yield). Its spectroscopic data are in agreement with those of the commercially available substance.  $^1\text{H}$  NMR (500 MHz,  $\text{CDCl}_3$ ): 7.46-7.39 (m, 6H), 5.88 (d,  $J = 16.5$  Hz, 1H).  $^{13}\text{C}$  NMR (125 MHz,  $\text{CDCl}_3$ ): 150.5, 133.5, 131.2, 129.1, 127.3, 118.1, 96.3.

**1*H*-indole-3-carbonitrile (1y)**

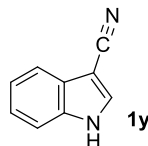

Yellow solid (86 mg, 59% yield). Its spectroscopic data are in agreement with those of the commercially available substance.  $^1\text{H}$  NMR (500 MHz,  $\text{CDCl}_3$ ): 8.77 (br s, 1H), 7.79 (d,  $J = 7.5$  Hz, 1H), 7.74 (d,  $J = 2.5$  Hz, 1H), 7.48 (d,  $J = 7.5$  Hz, 1H), 7.36-7.29 (m, 2H).  $^{13}\text{C}$  NMR (125 MHz,  $\text{CDCl}_3$ ): 134.8, 131.8, 126.9, 124.3, 122.4, 119.7, 115.8, 112.0, 87.6.

**References**

1. B. V. Rokade and K. R. Prabhu, *J. Org. Chem.*, 2012, **77**, 5364.
2. S. T. Chill and R. C. Mebane, *Synth. Commun.*, 2009, **39**, 3601.
3. T. Betke, P. Rommelmann, K. Oike, Y. Asano and H. Groger, *Angew. Chem. Int. Ed.*, 2017, **56**, 12361.
4. M. Ezawa and H. Togo, *Eur. J. Org. Chem.*, 2017, 2379.
5. B. Anxionnat, D. G. Pardo, G. Ricci and J. Cossy, *Org. Lett.*, 2011, **13**, 4084.

**$^1\text{H}$  and  $^{13}\text{C}$  NMR of synthesized nitriles (500 MHz)**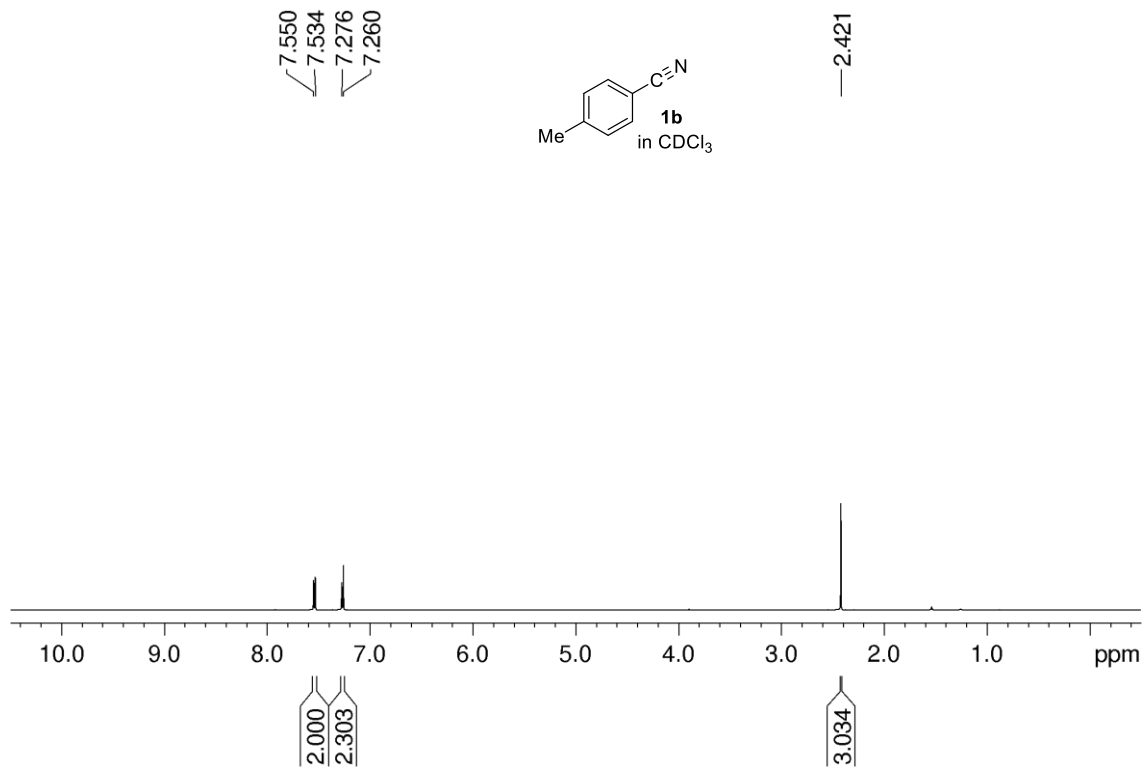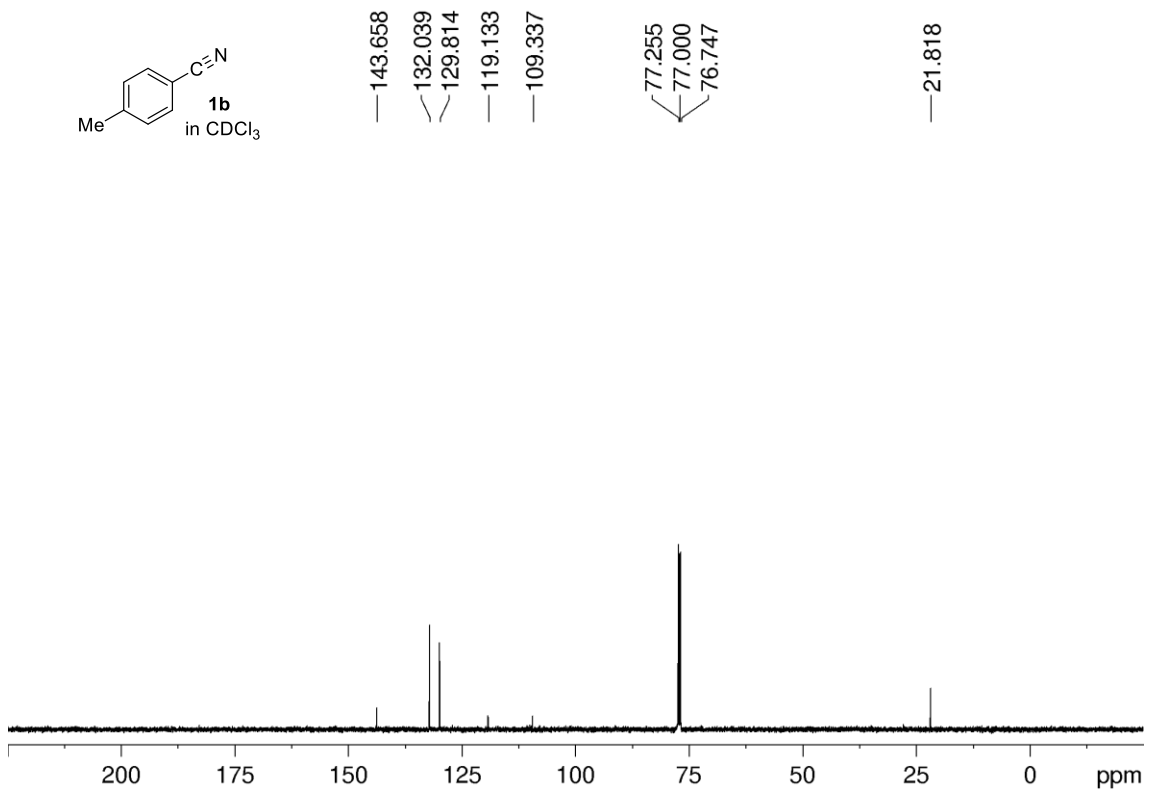

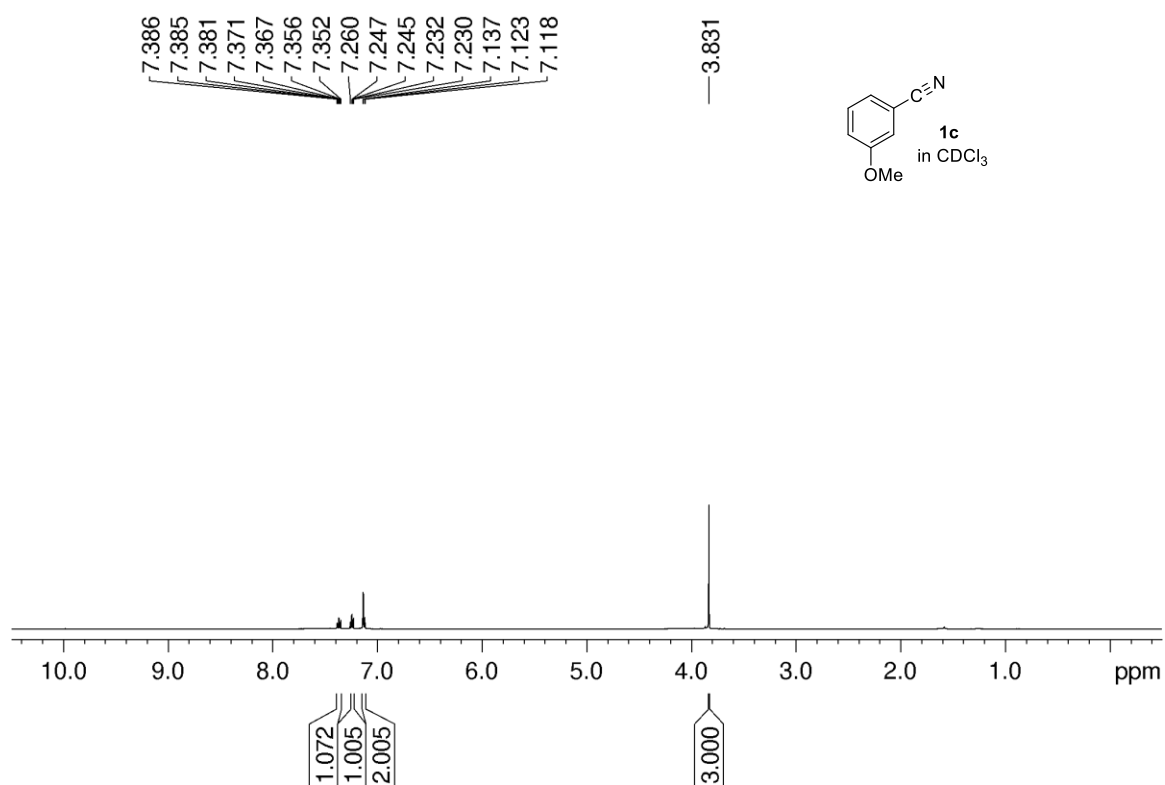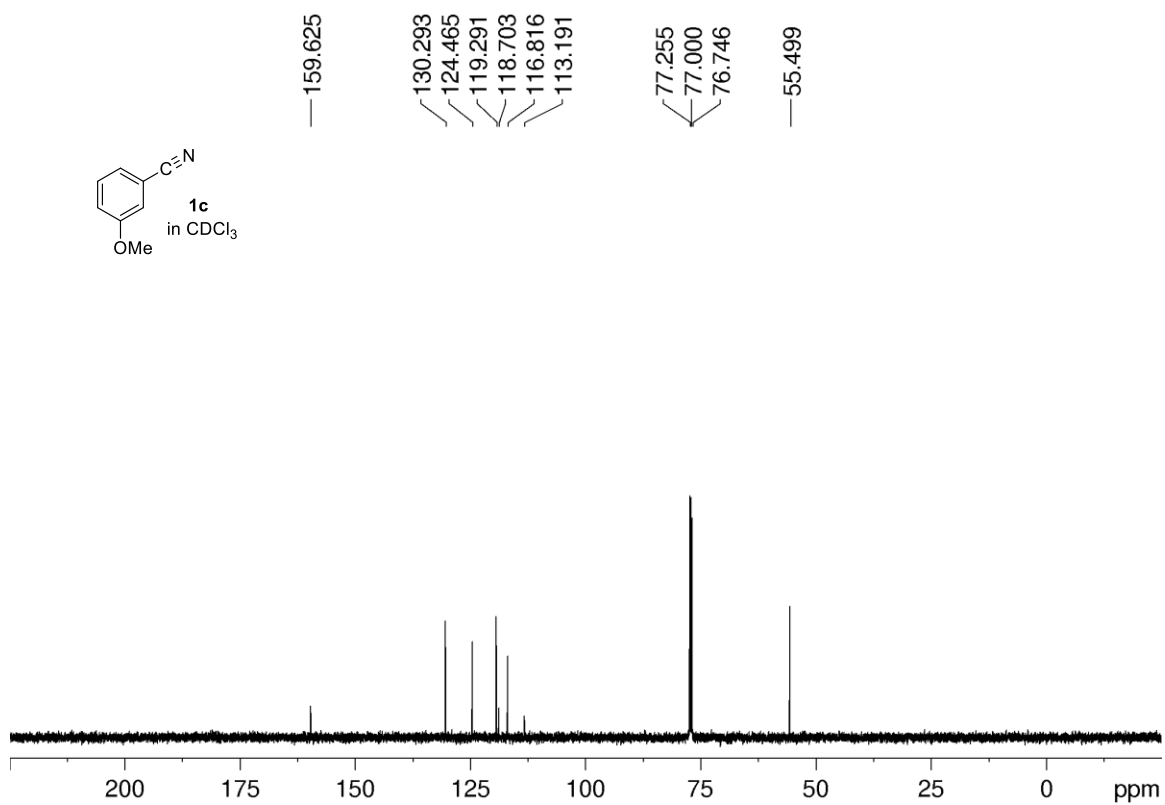



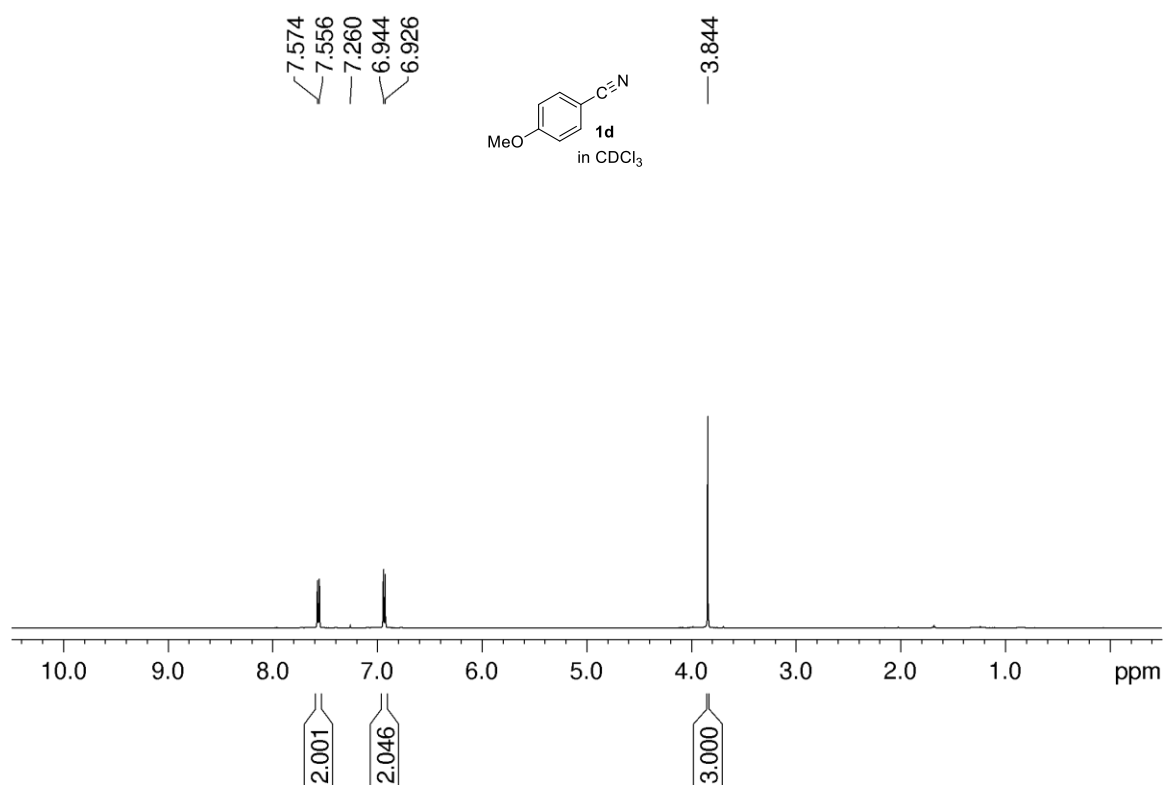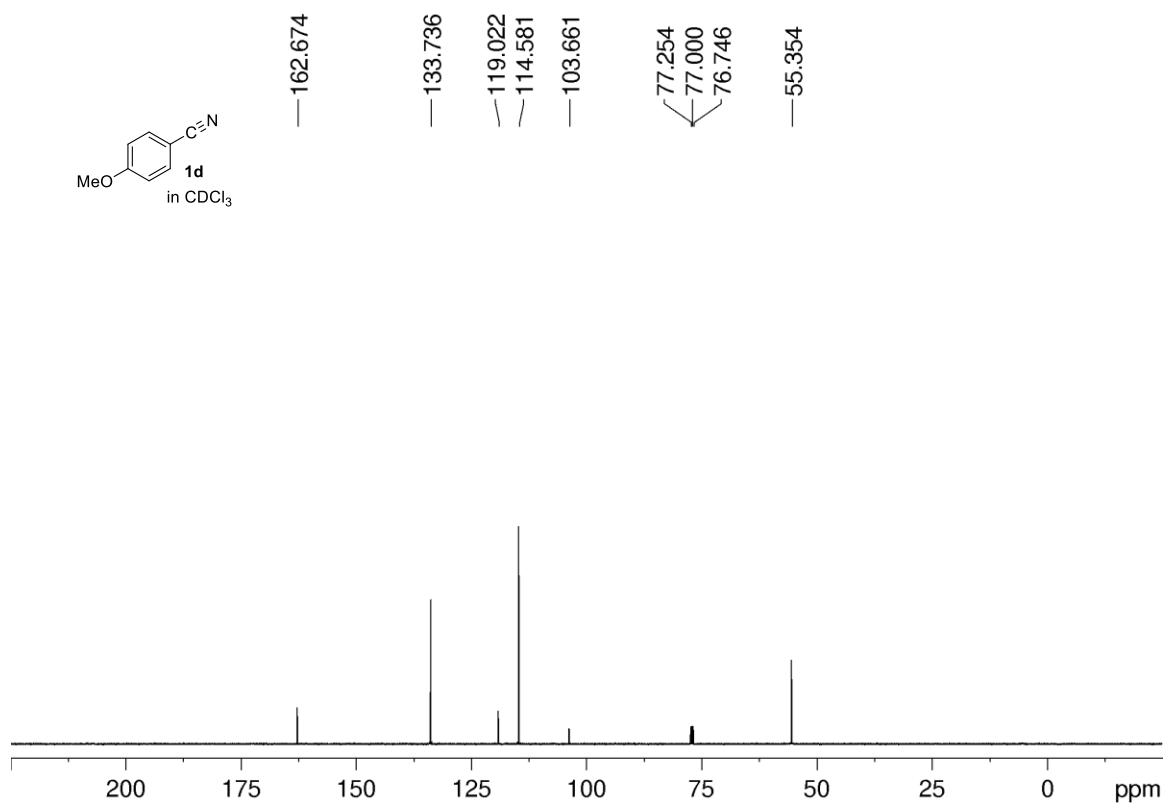

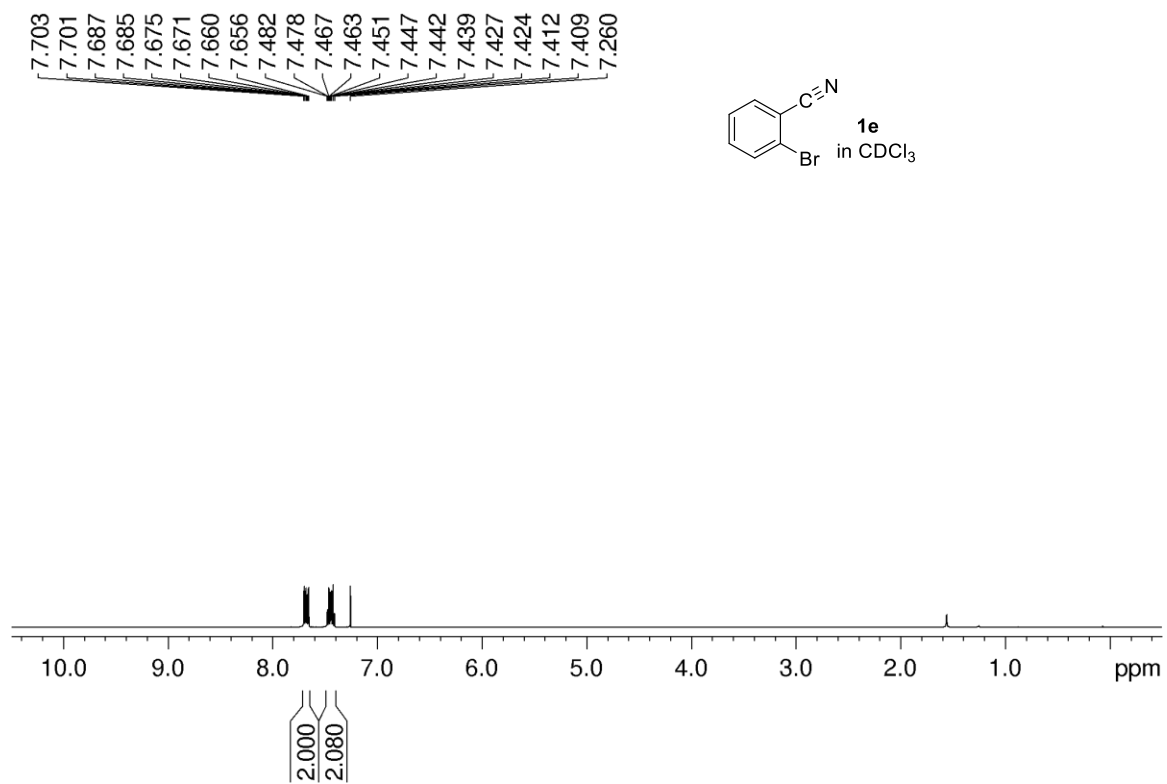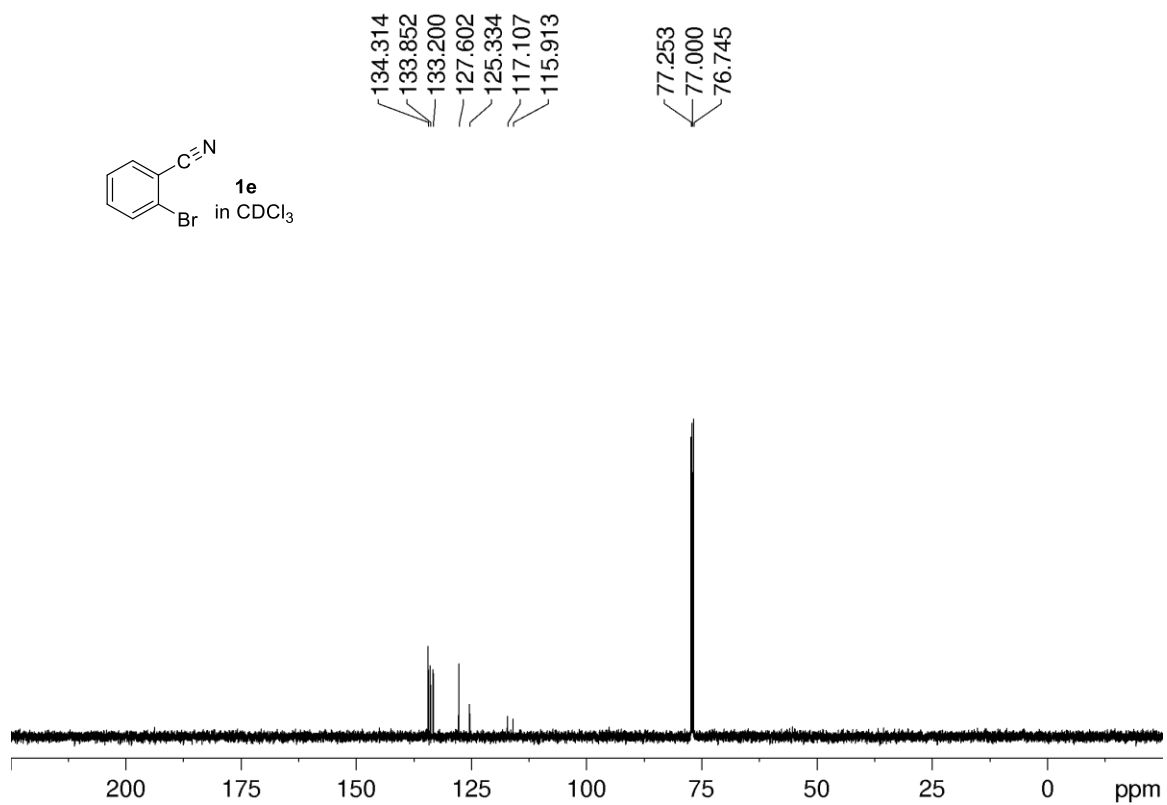

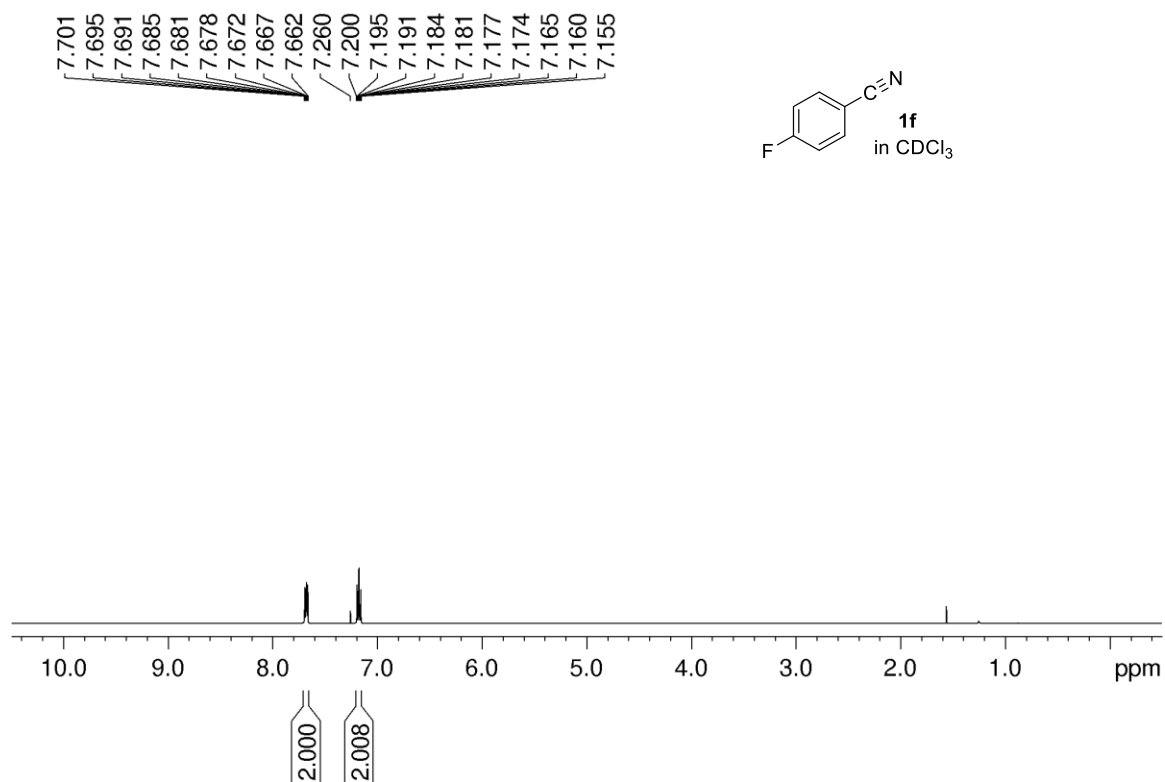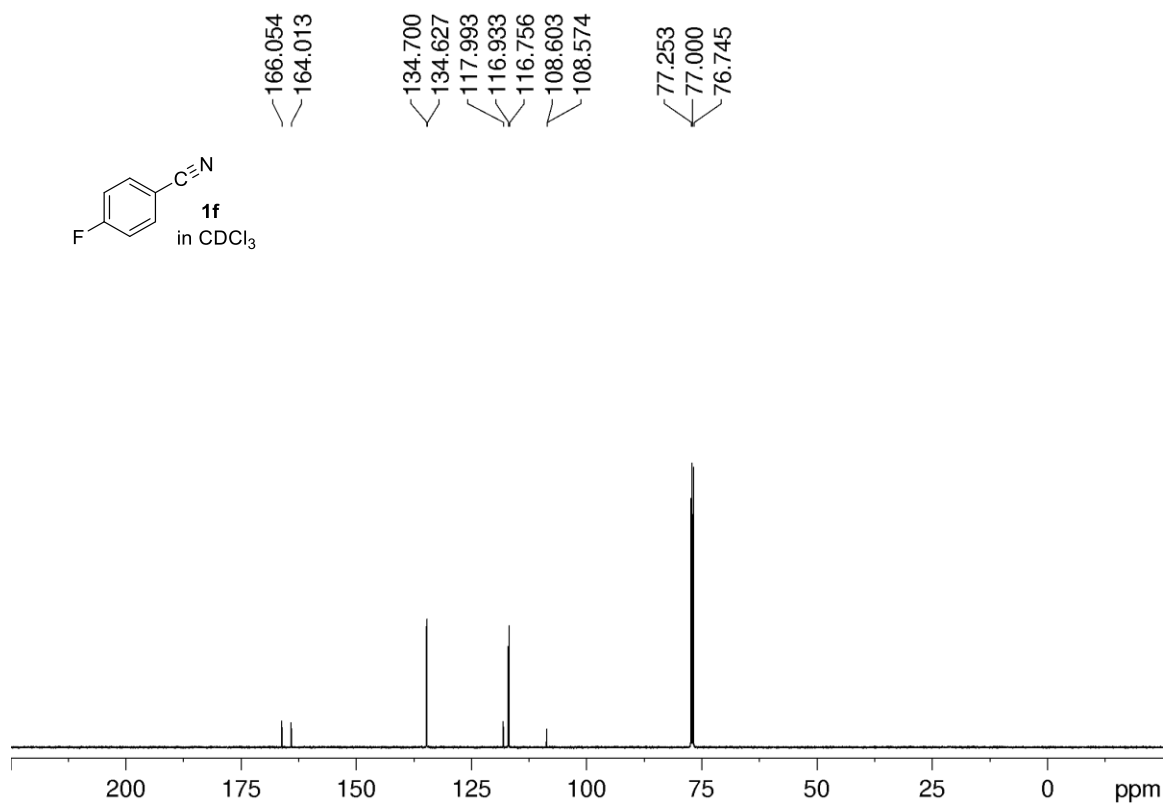

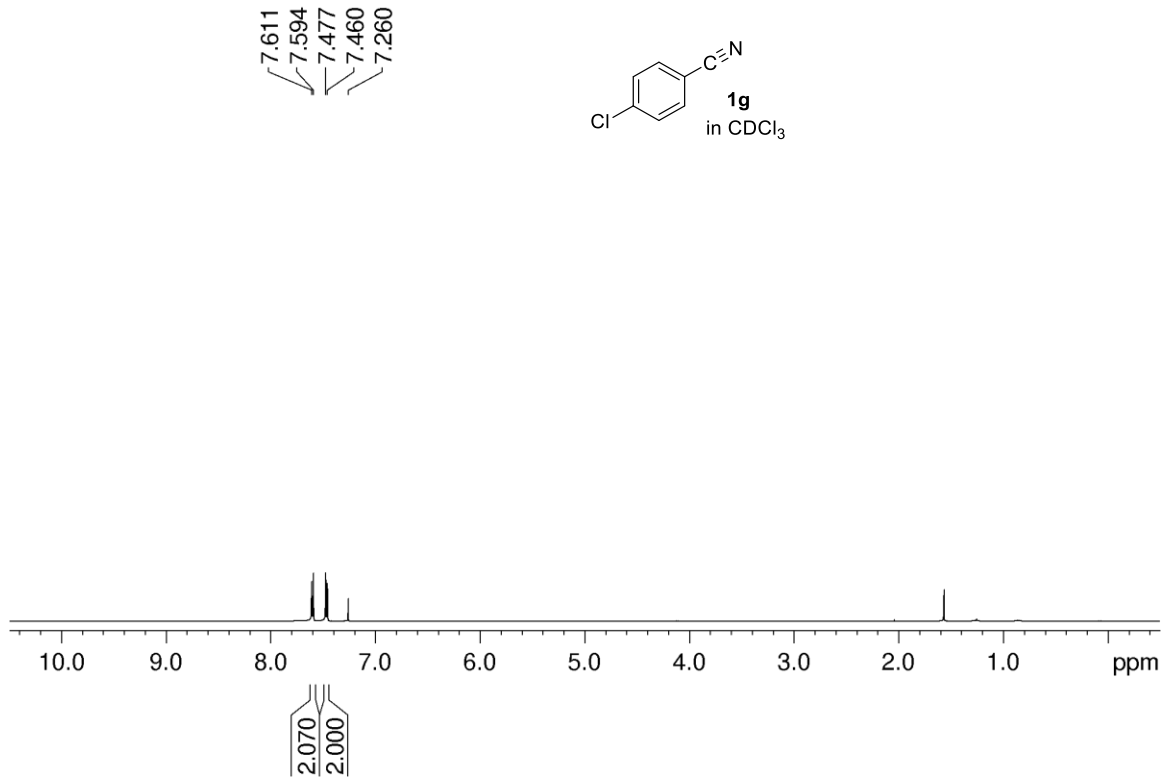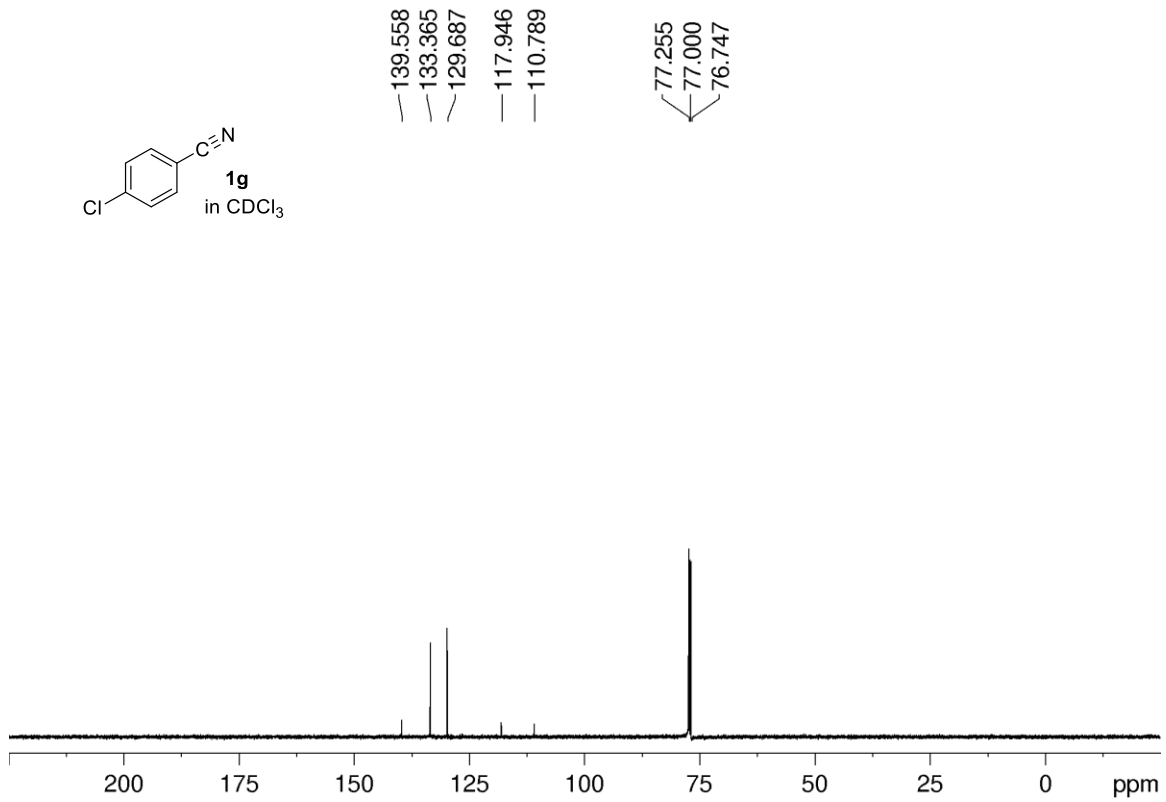

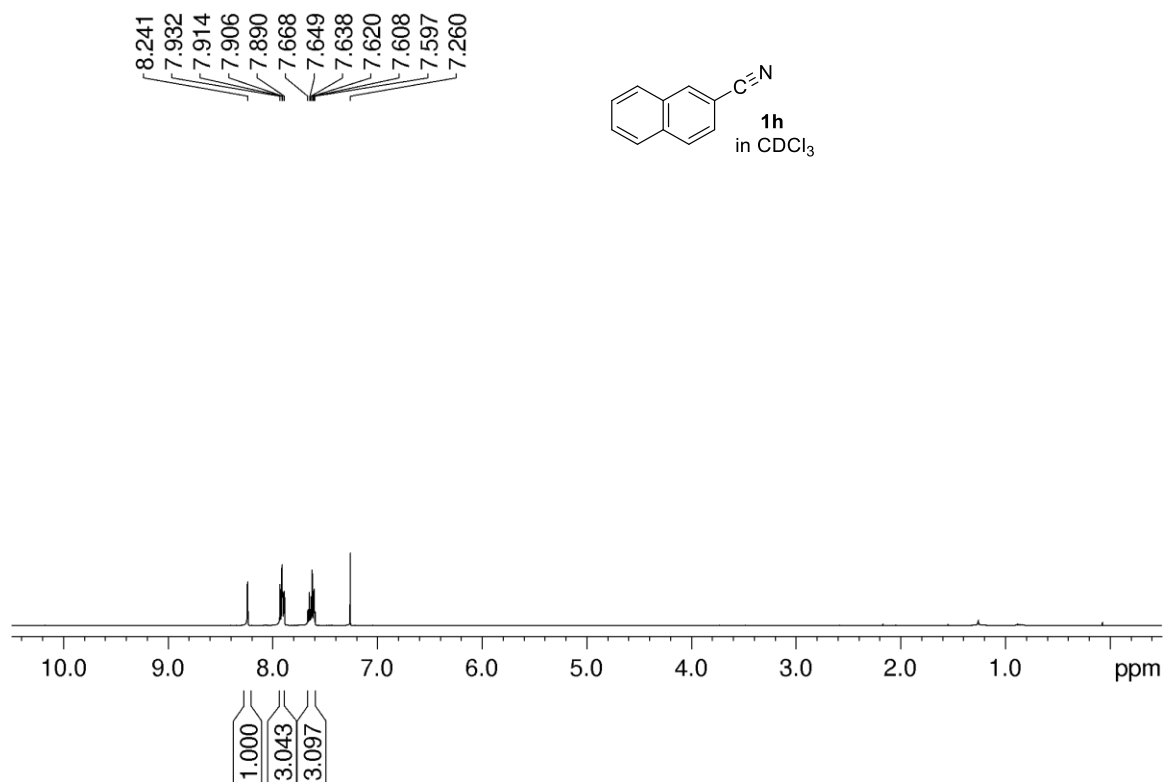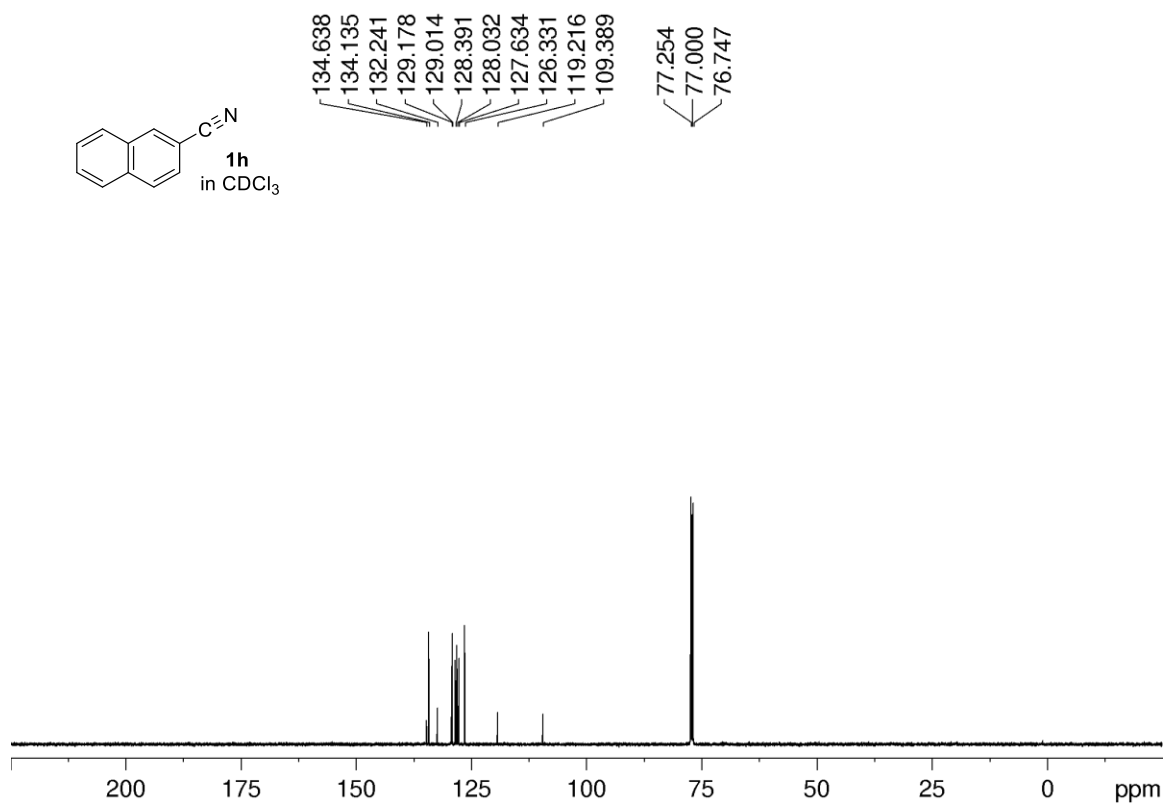

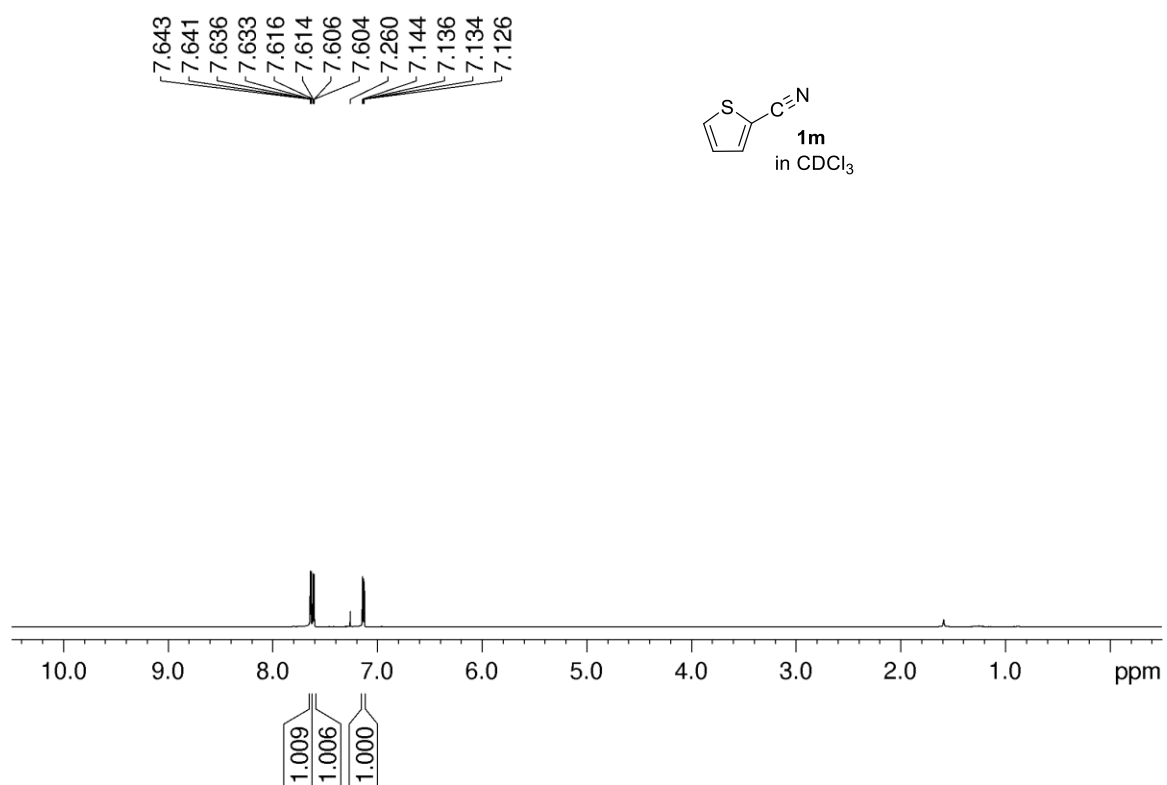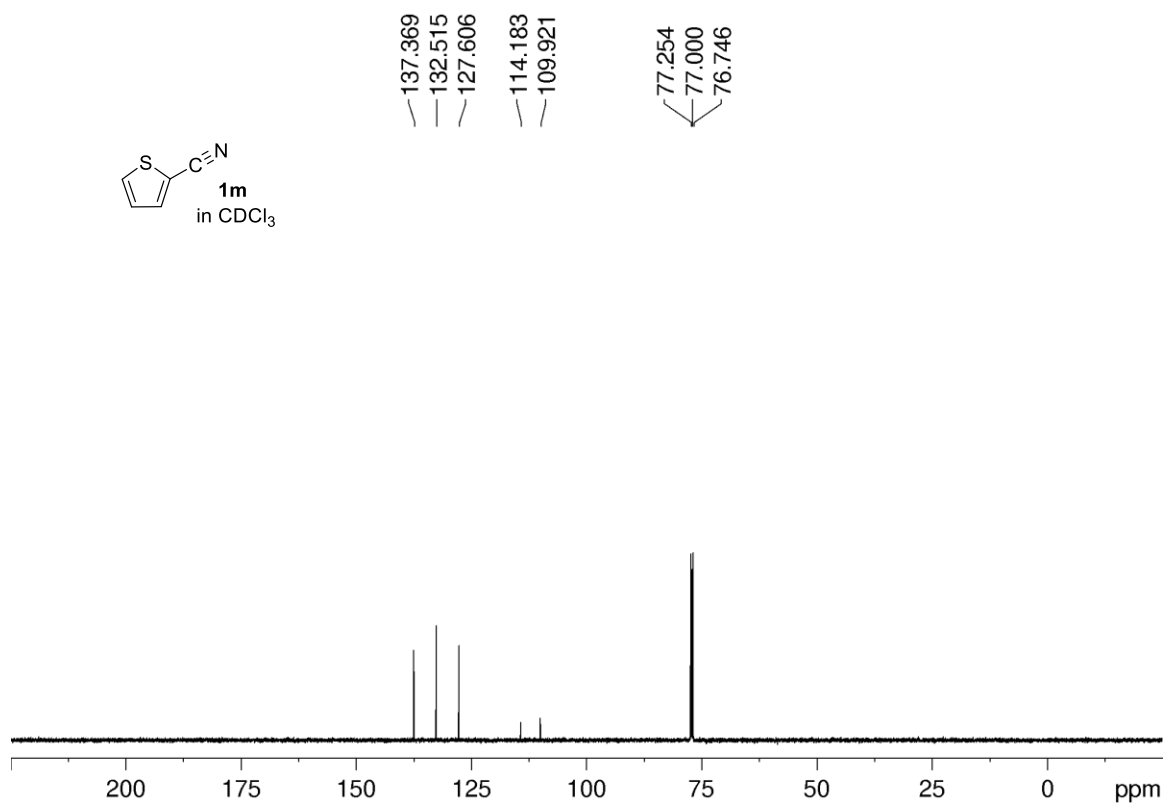

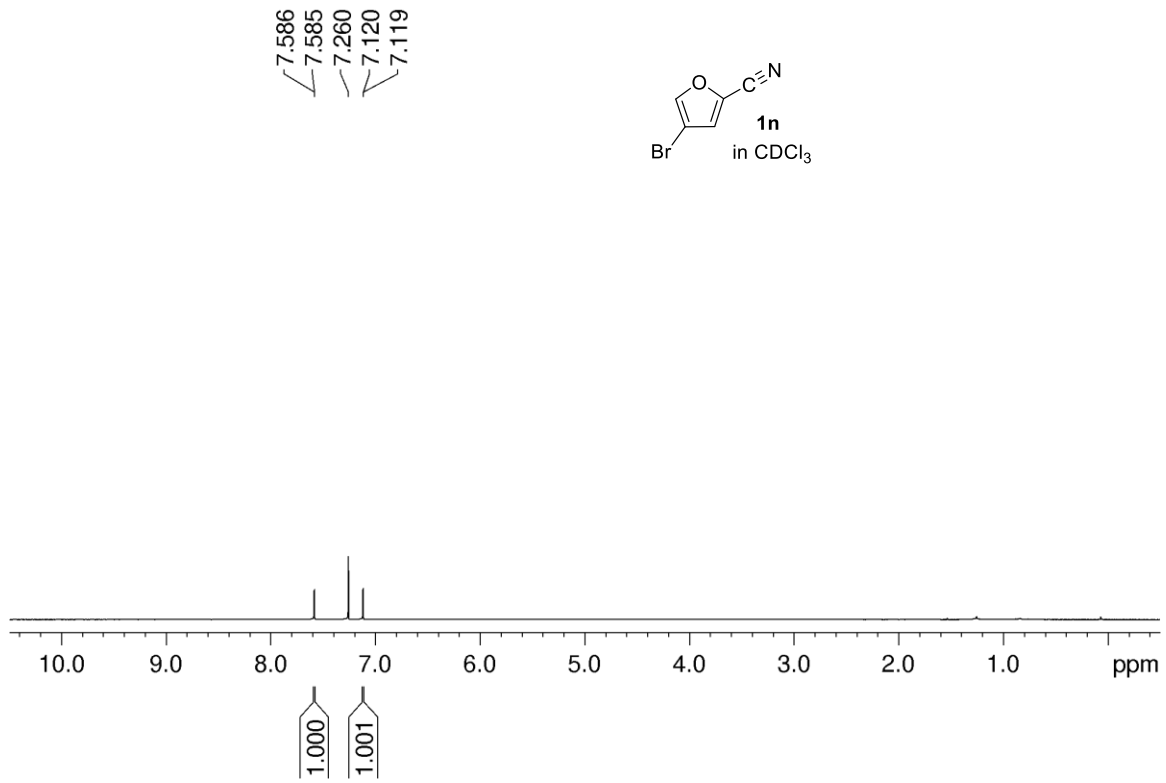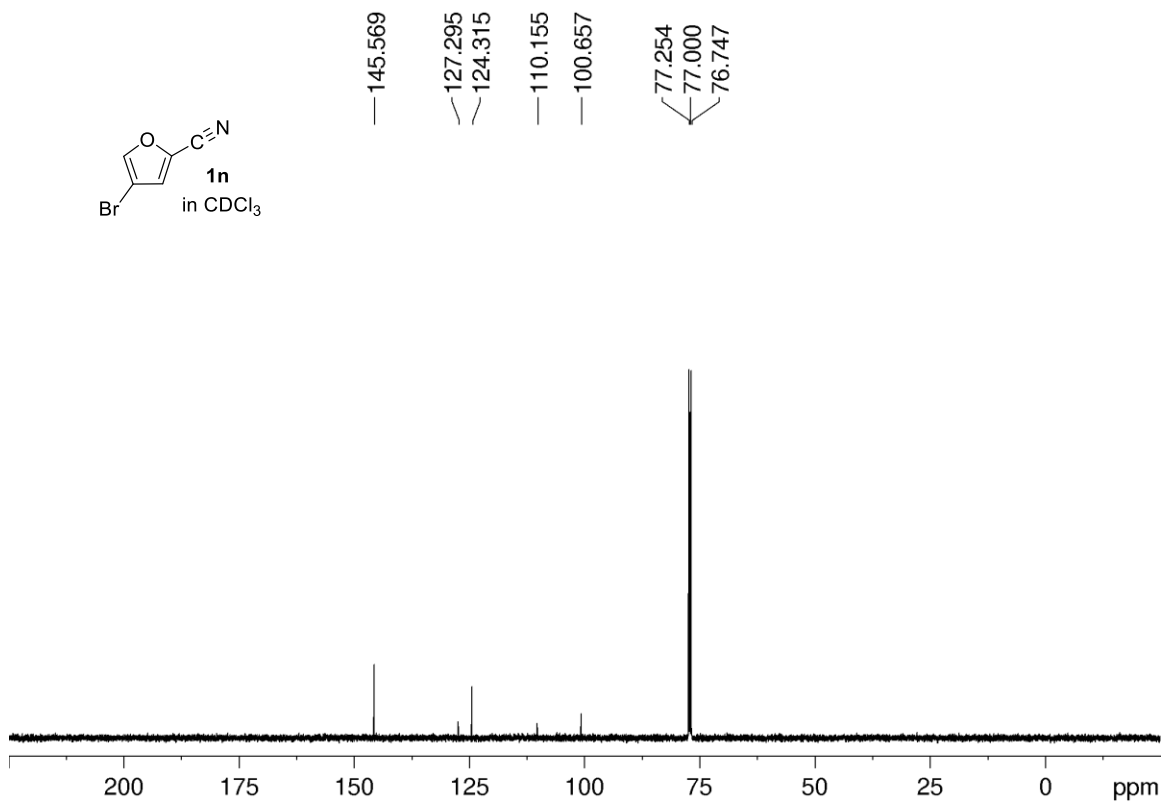

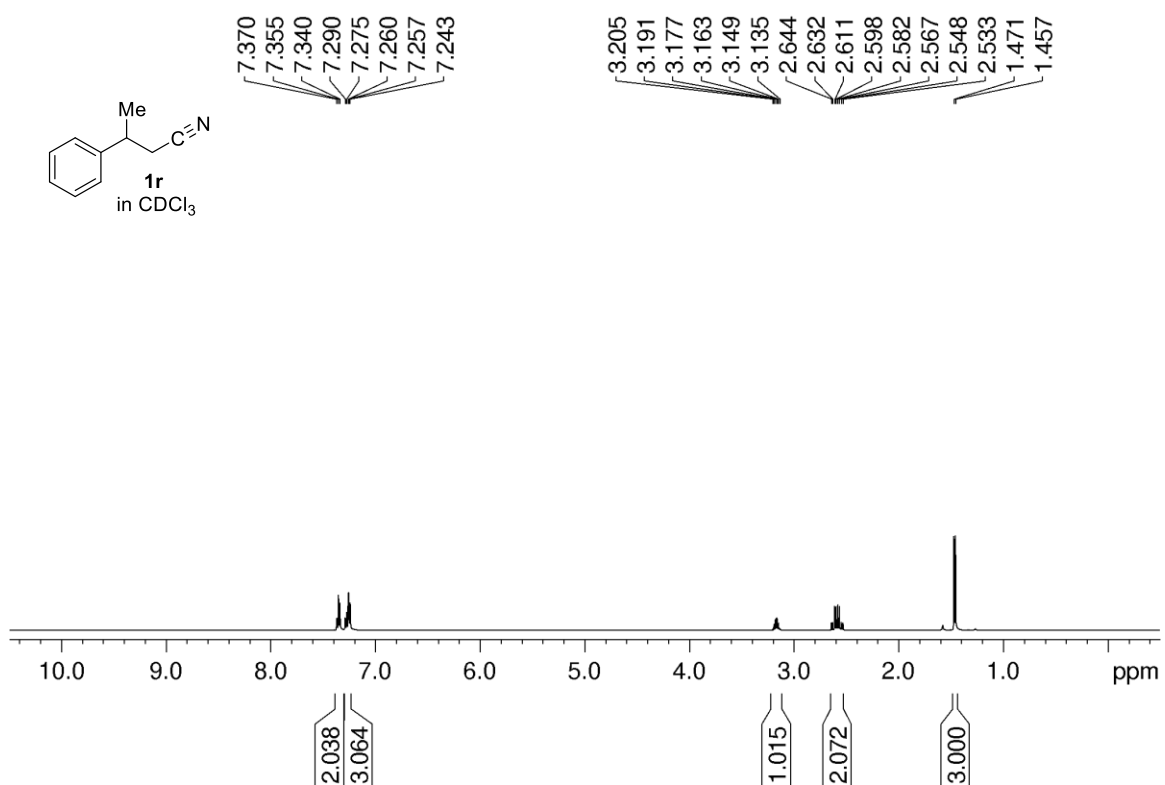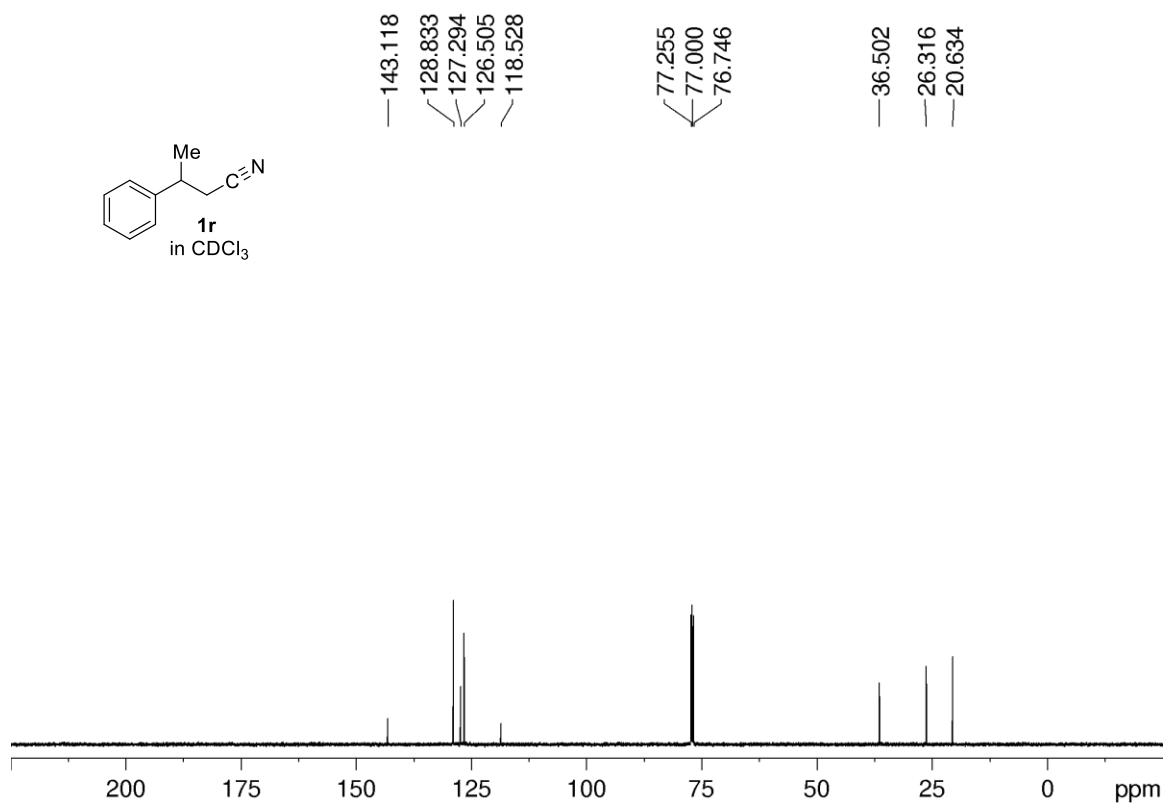



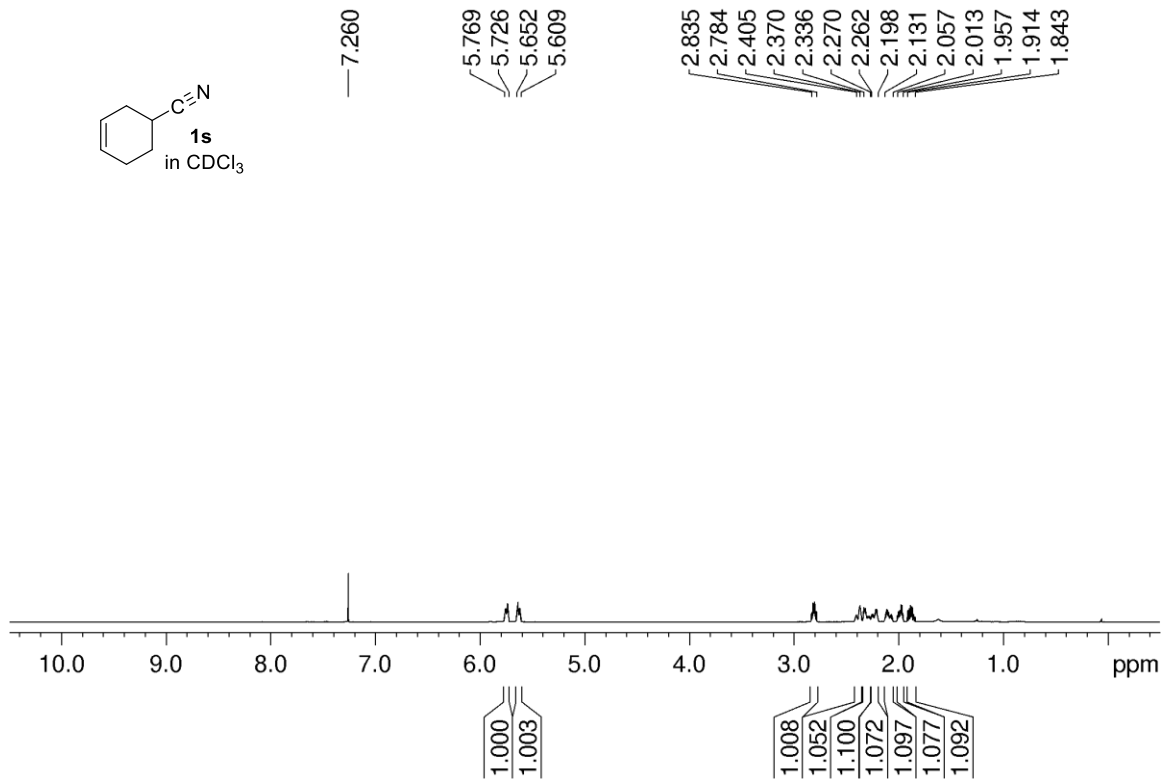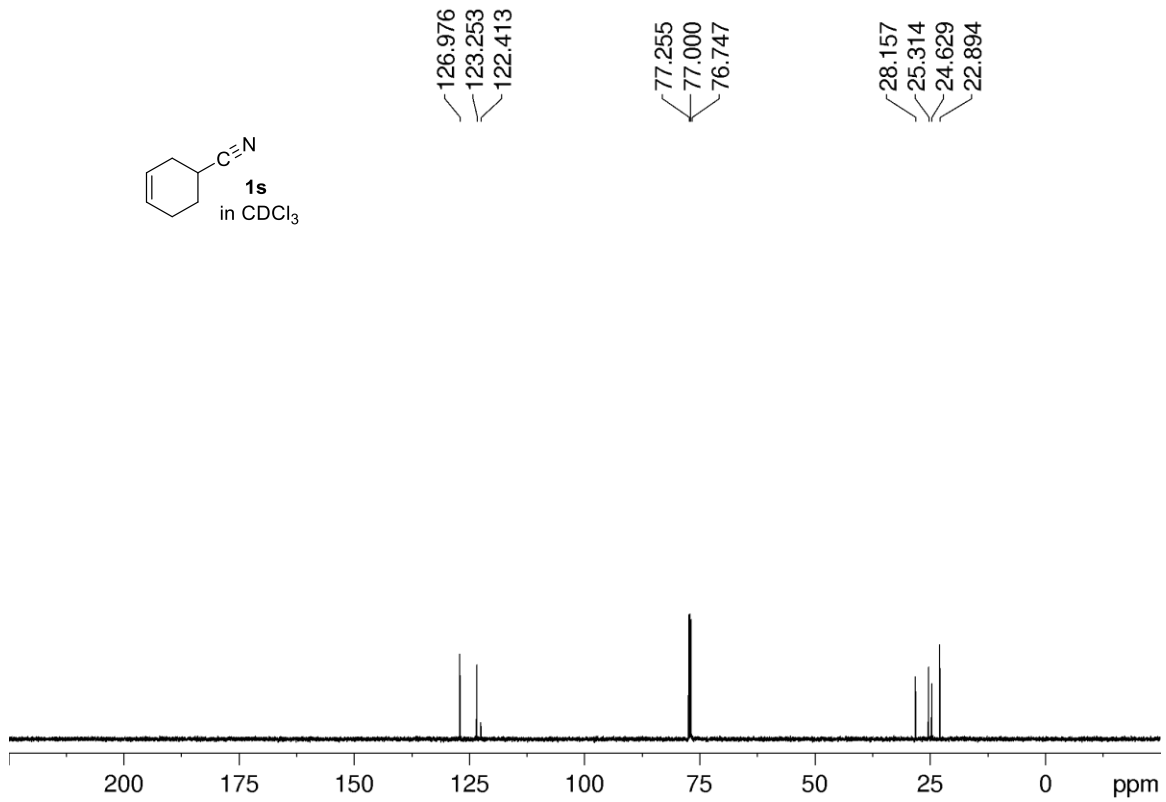

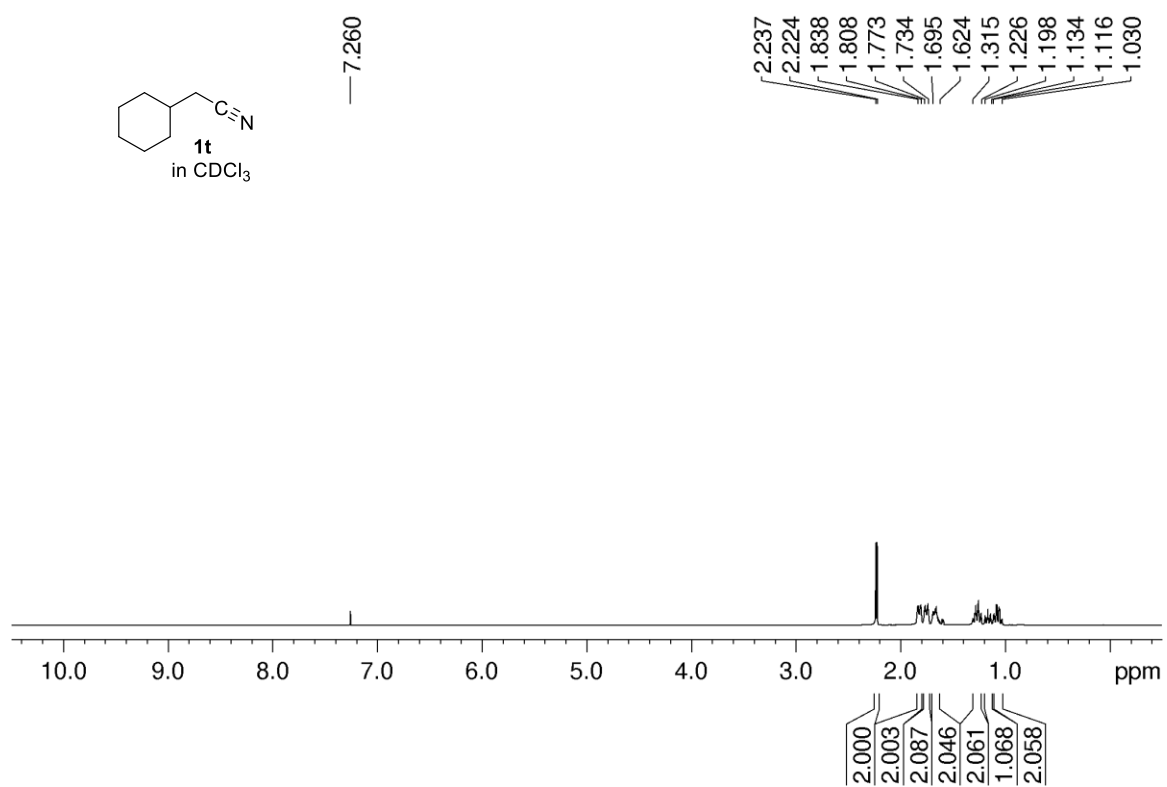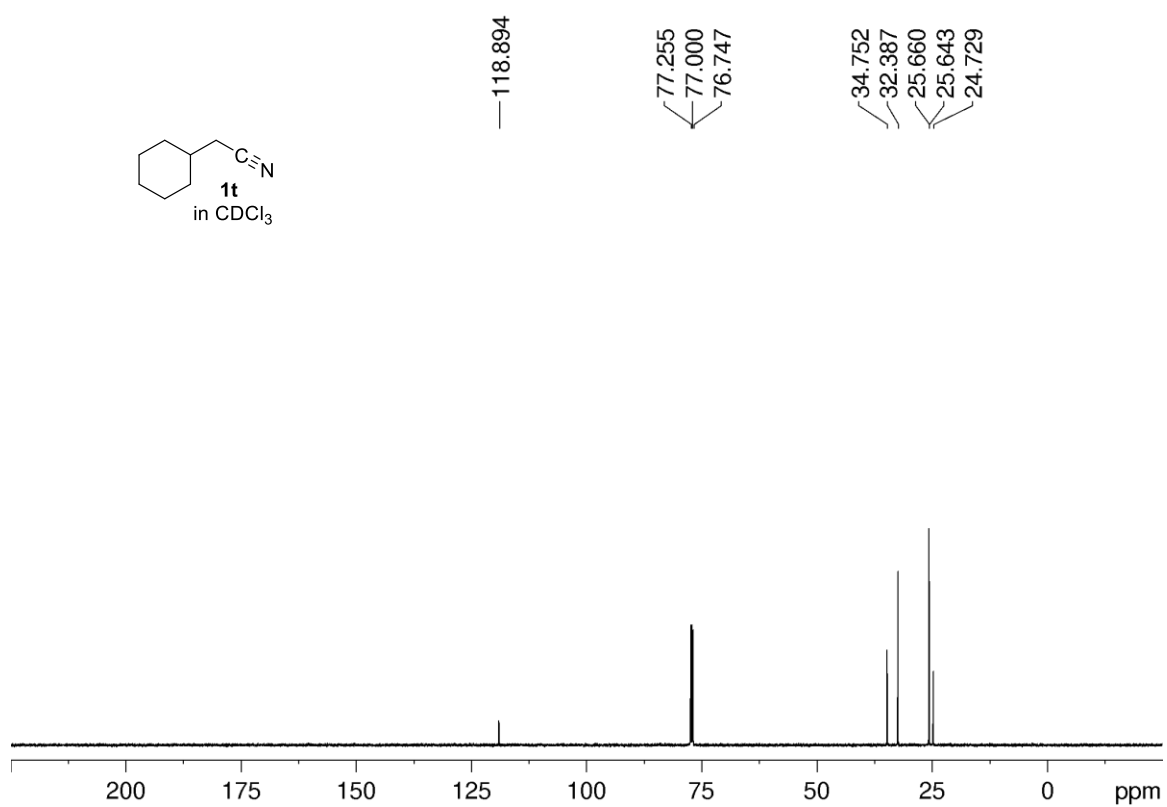

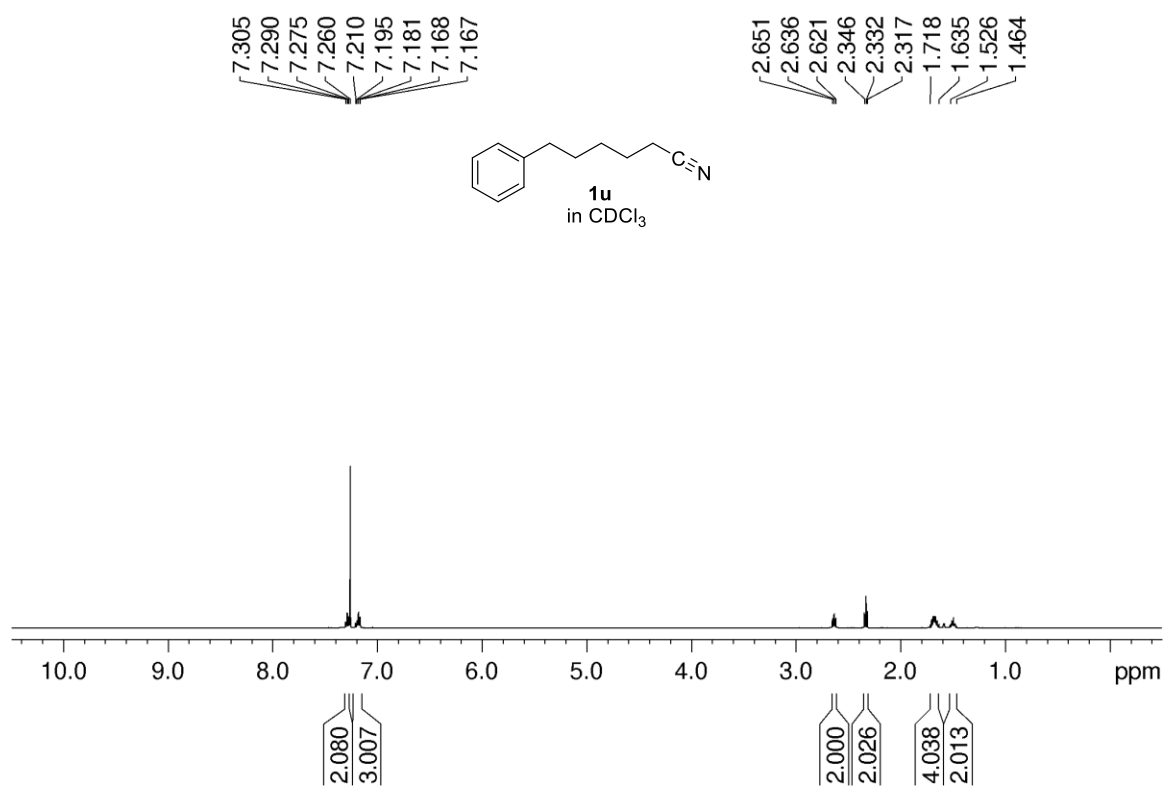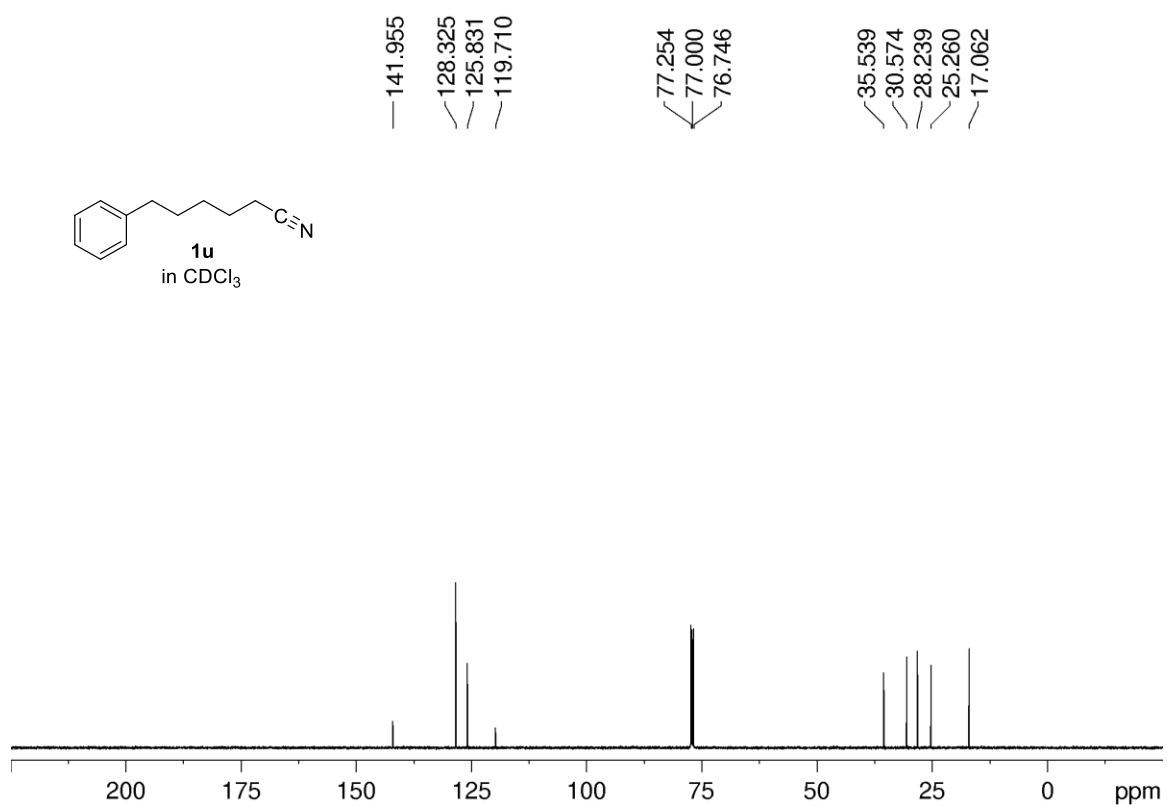

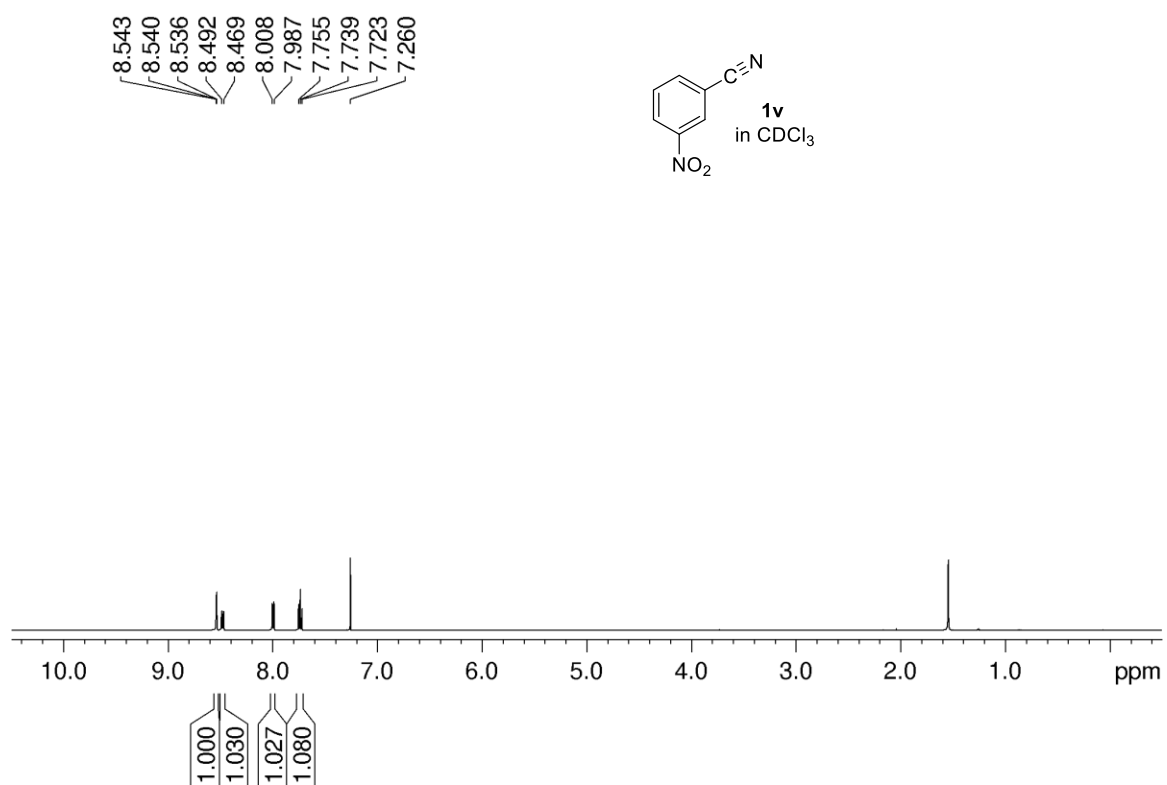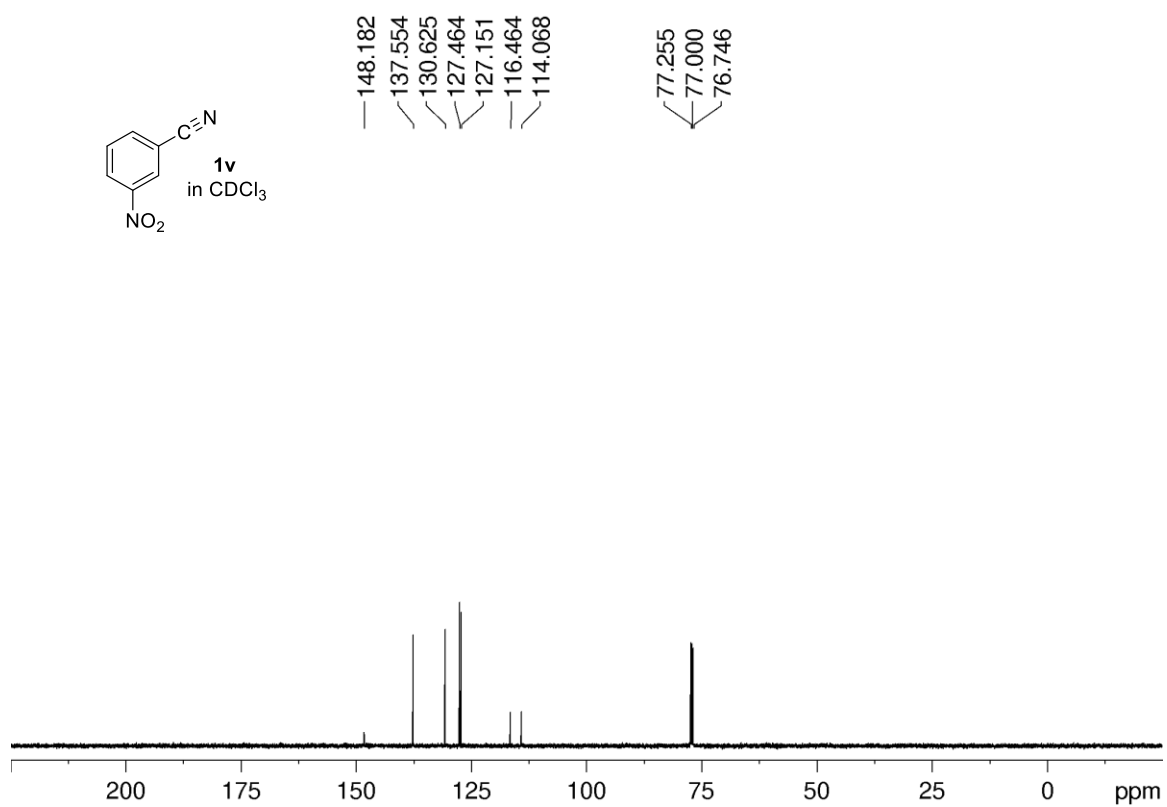

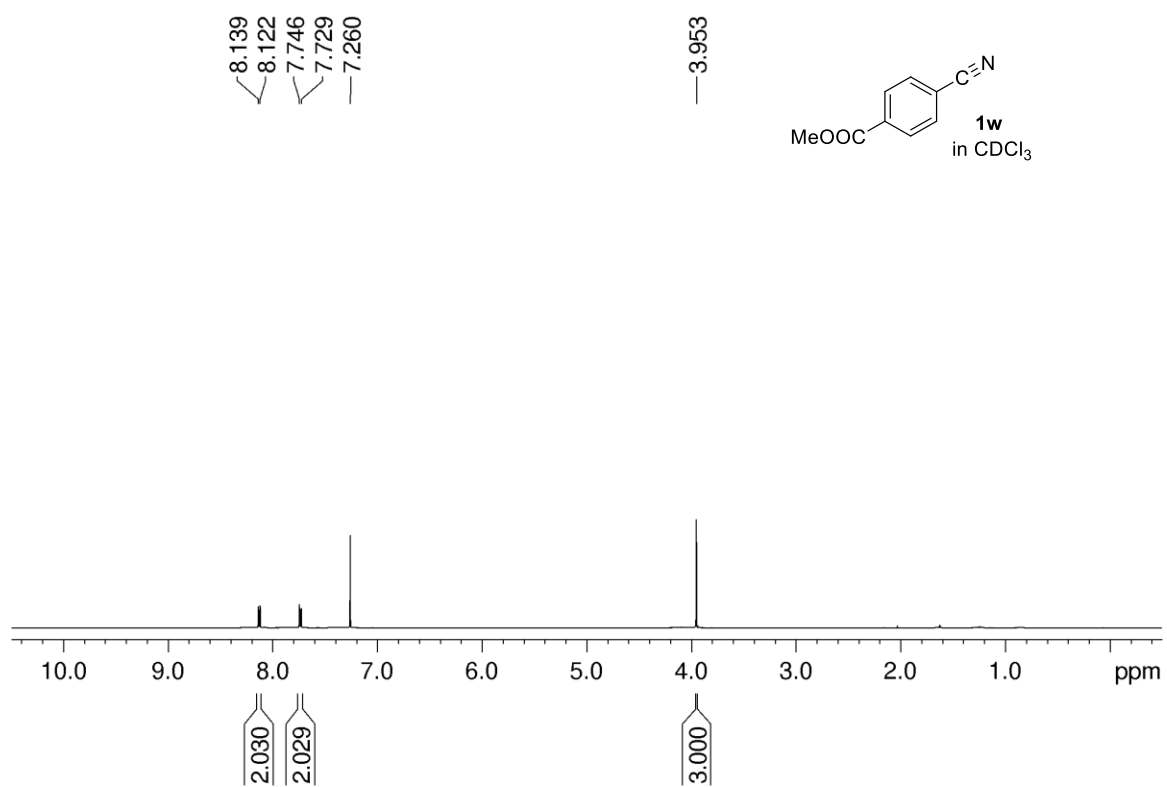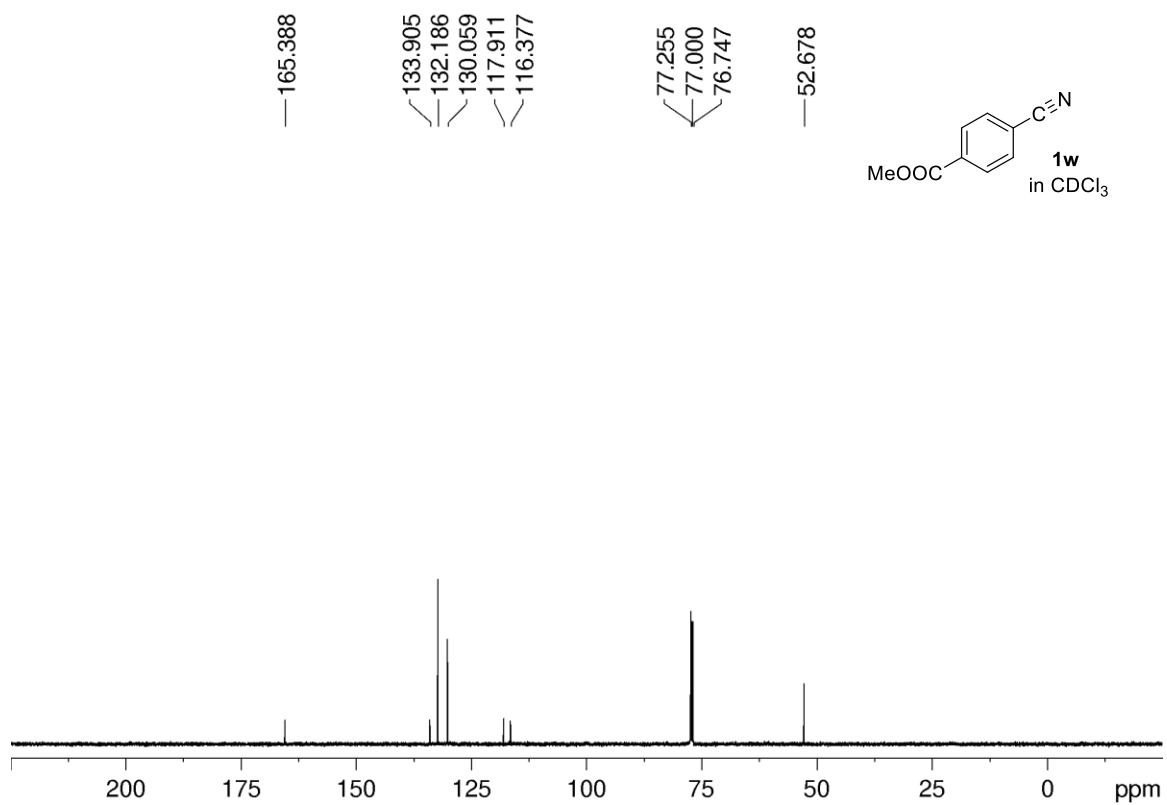

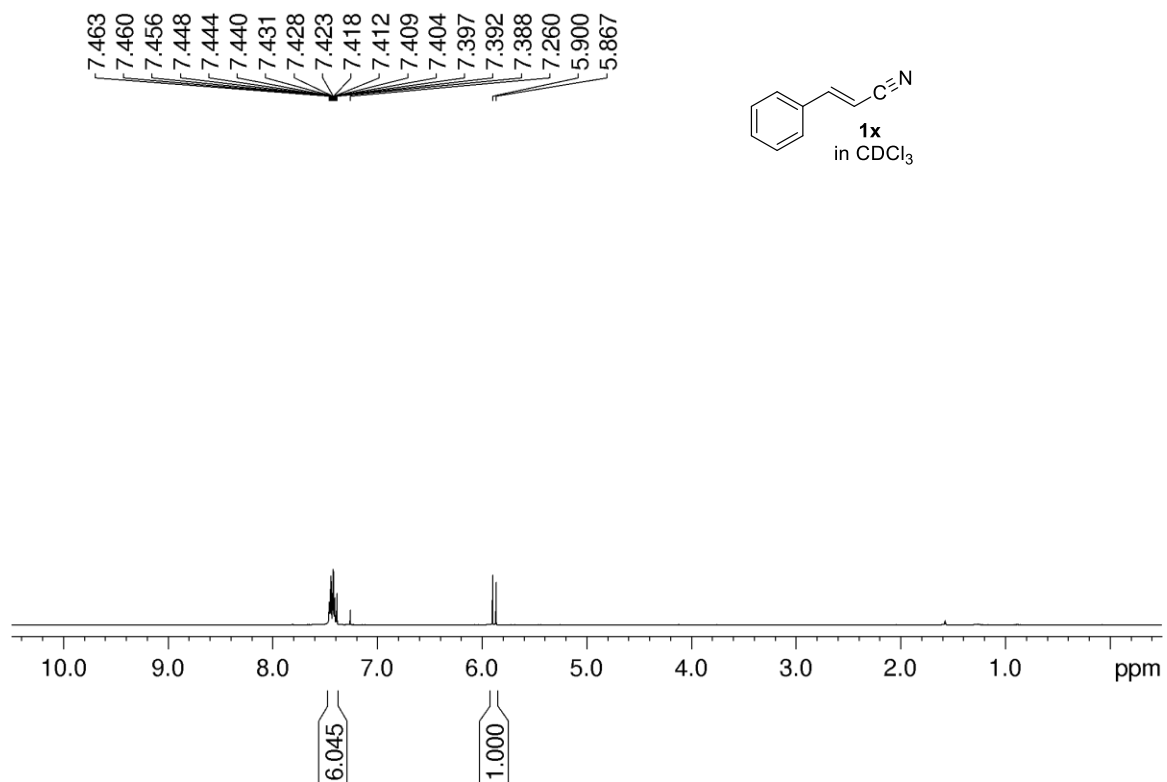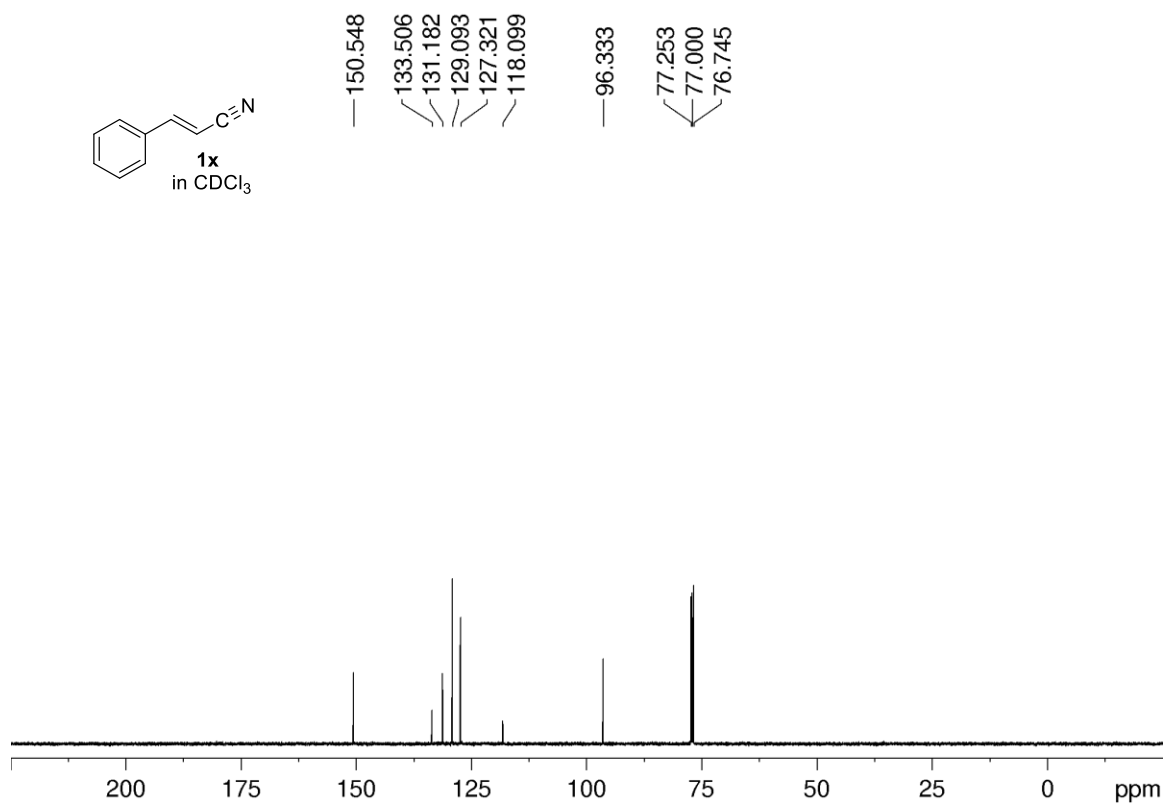

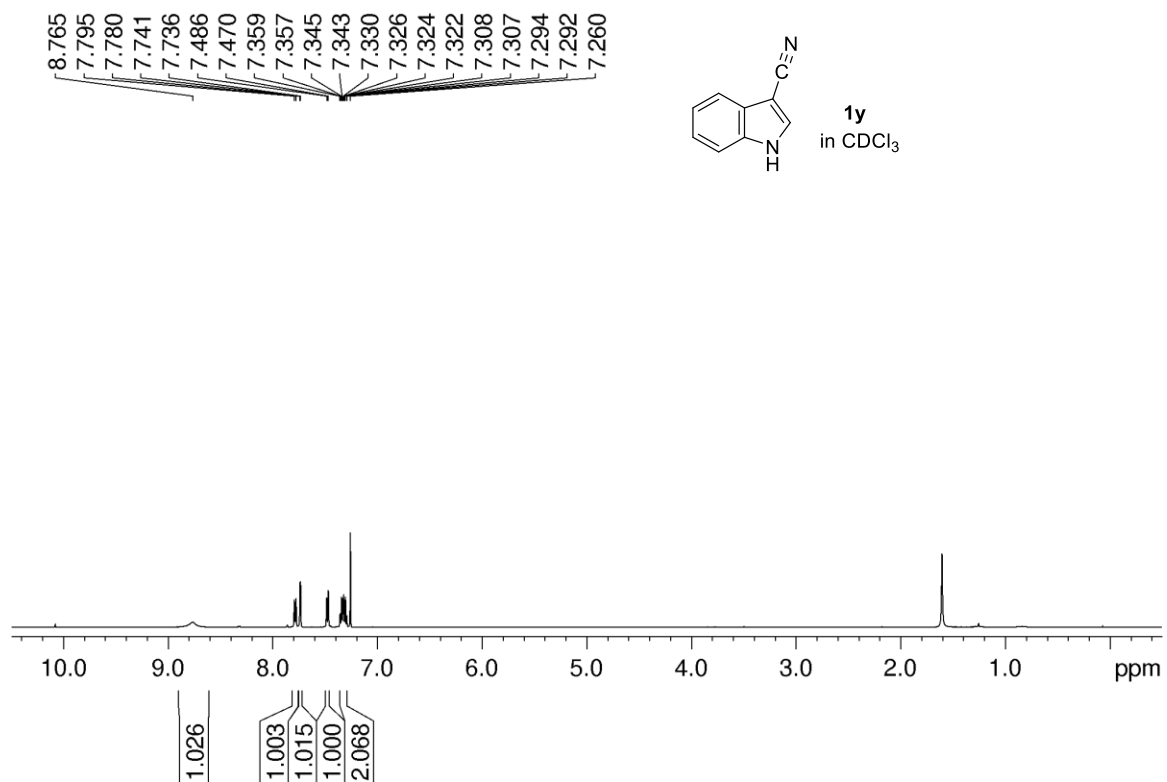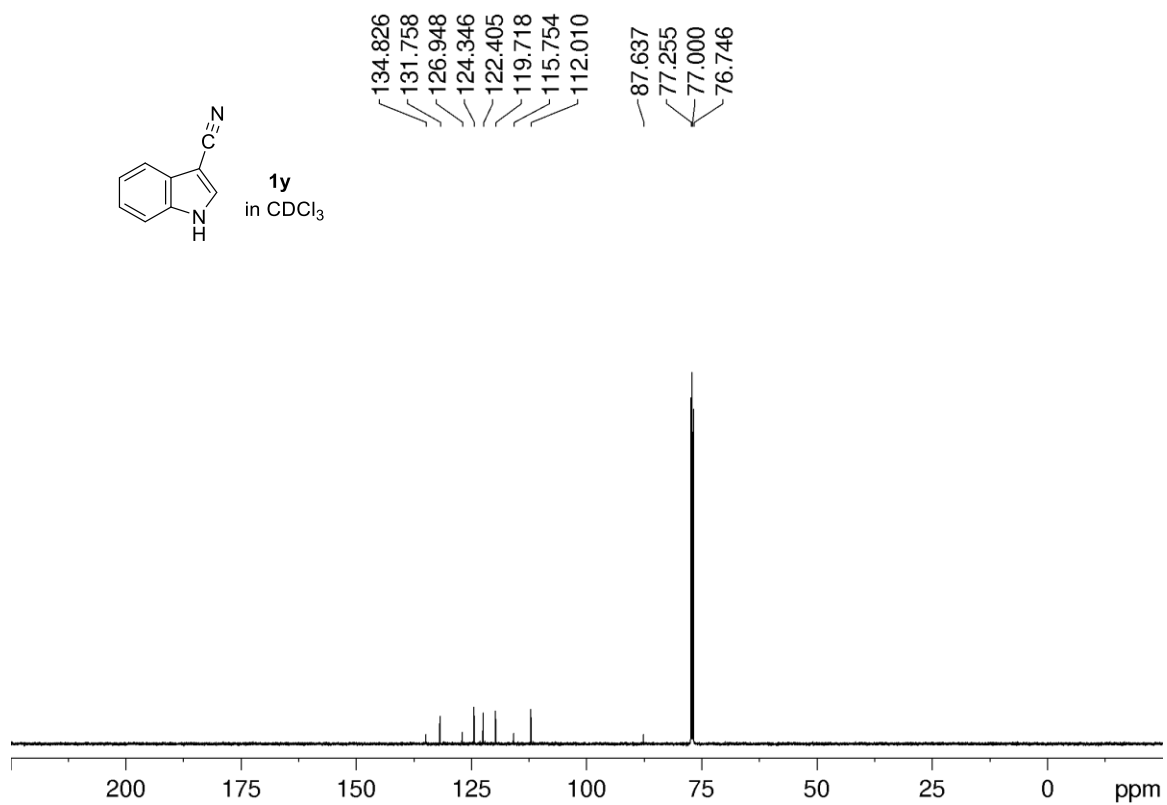

**$^1\text{H}$  and  $^{13}\text{C}$  NMR spectra of products (500 MHz)**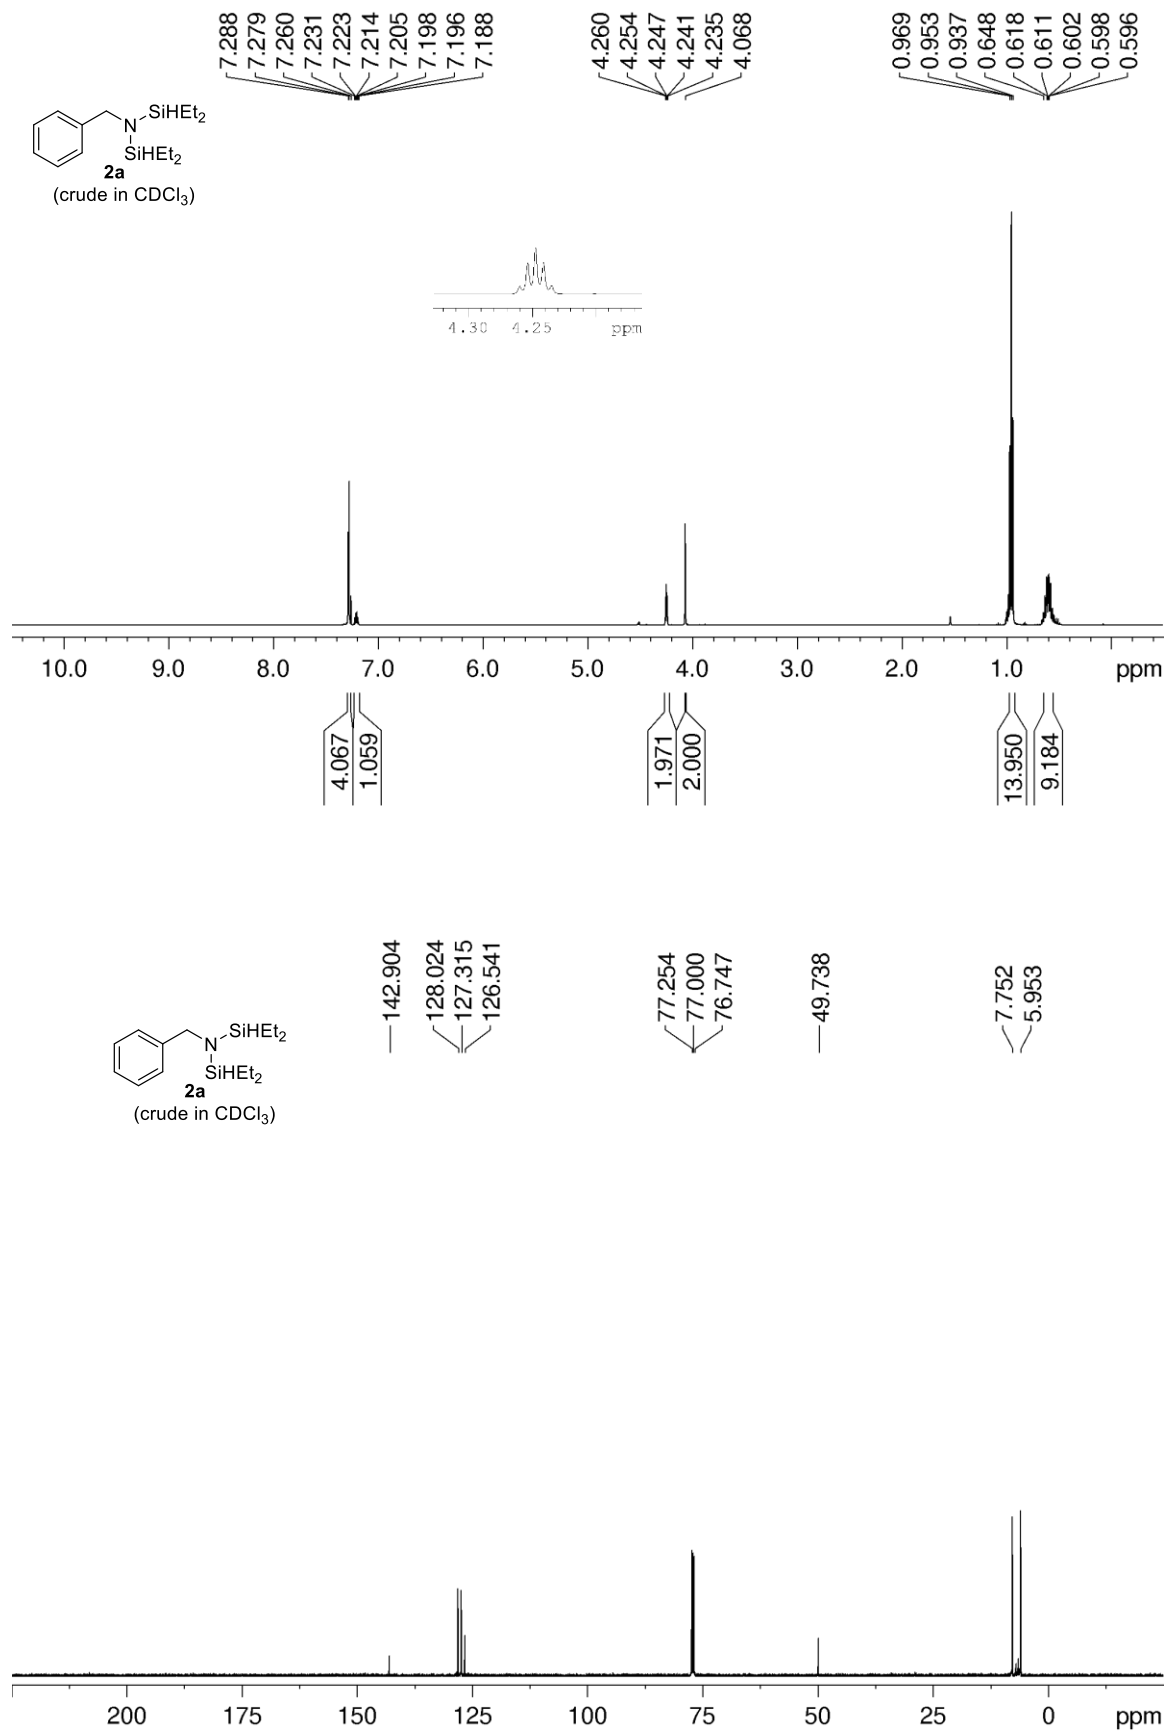



S25

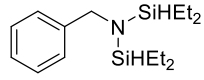

Molecular Weight: 279.57

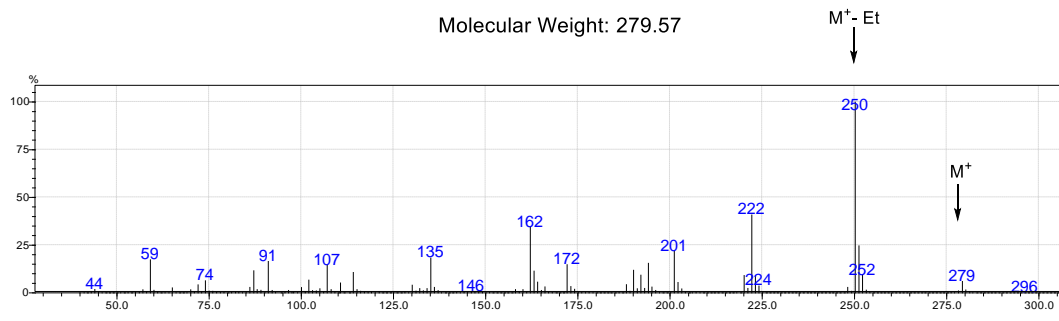

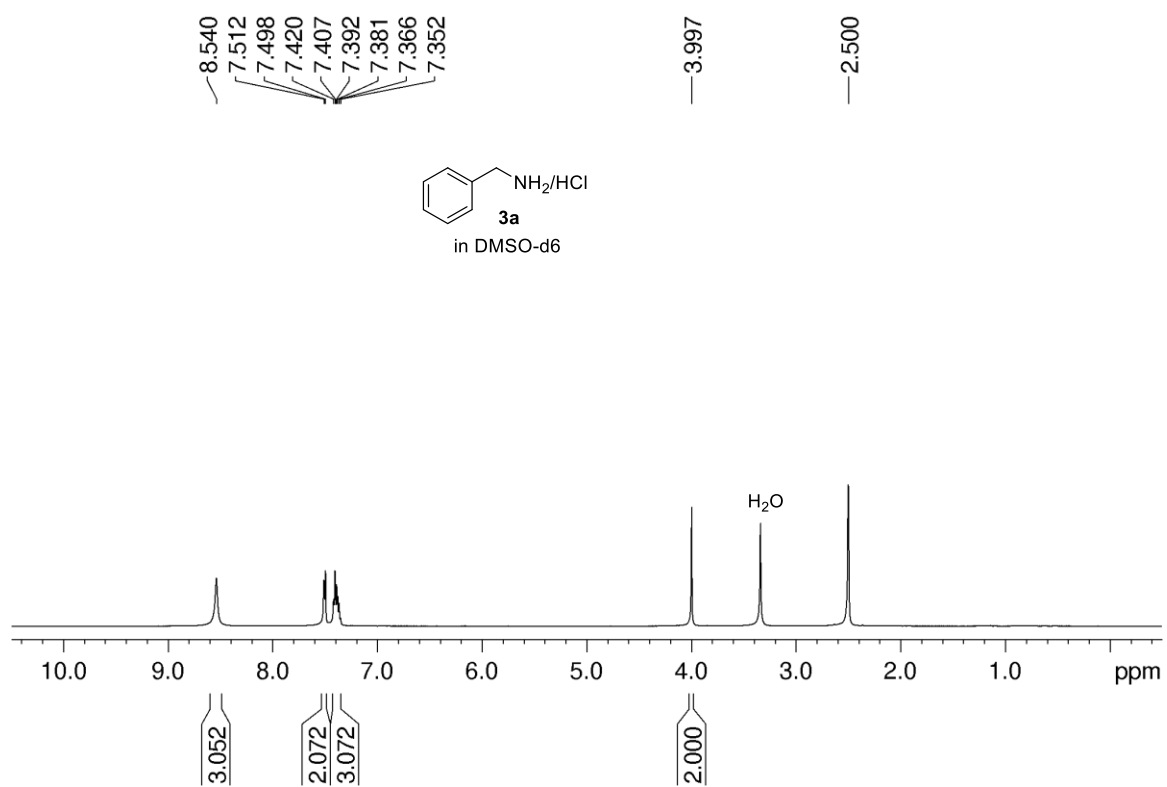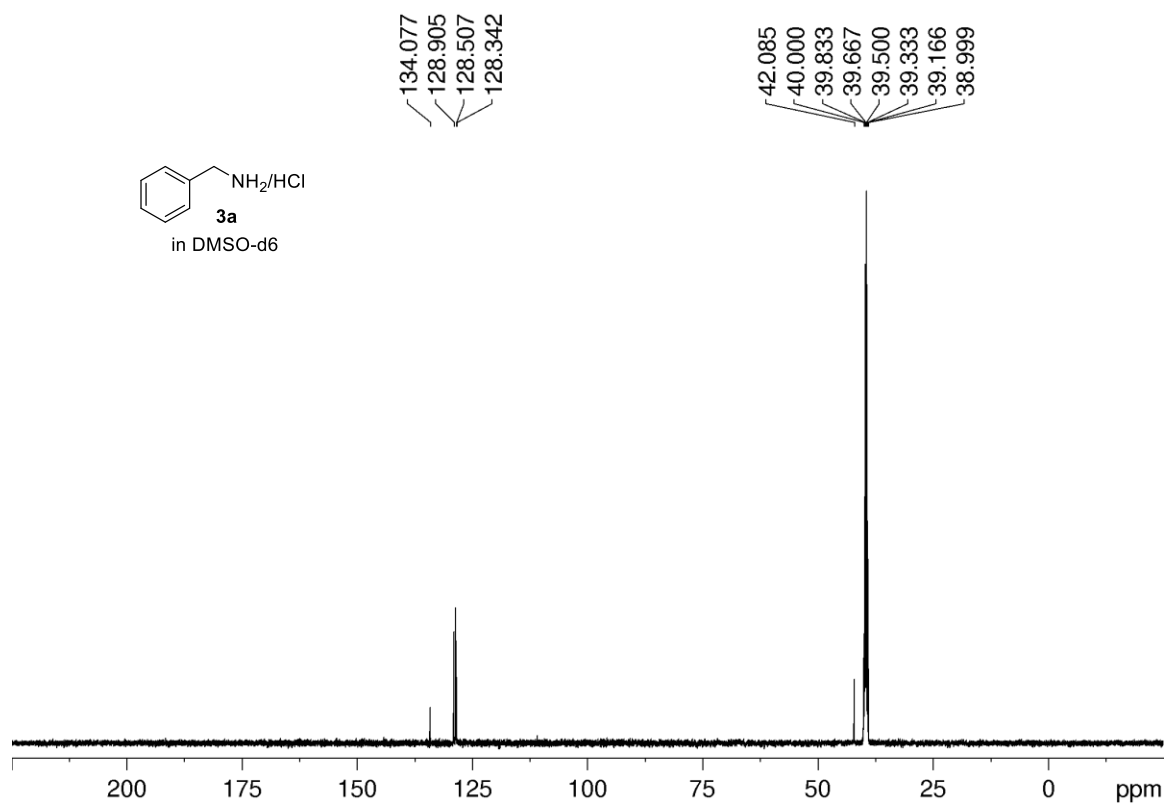

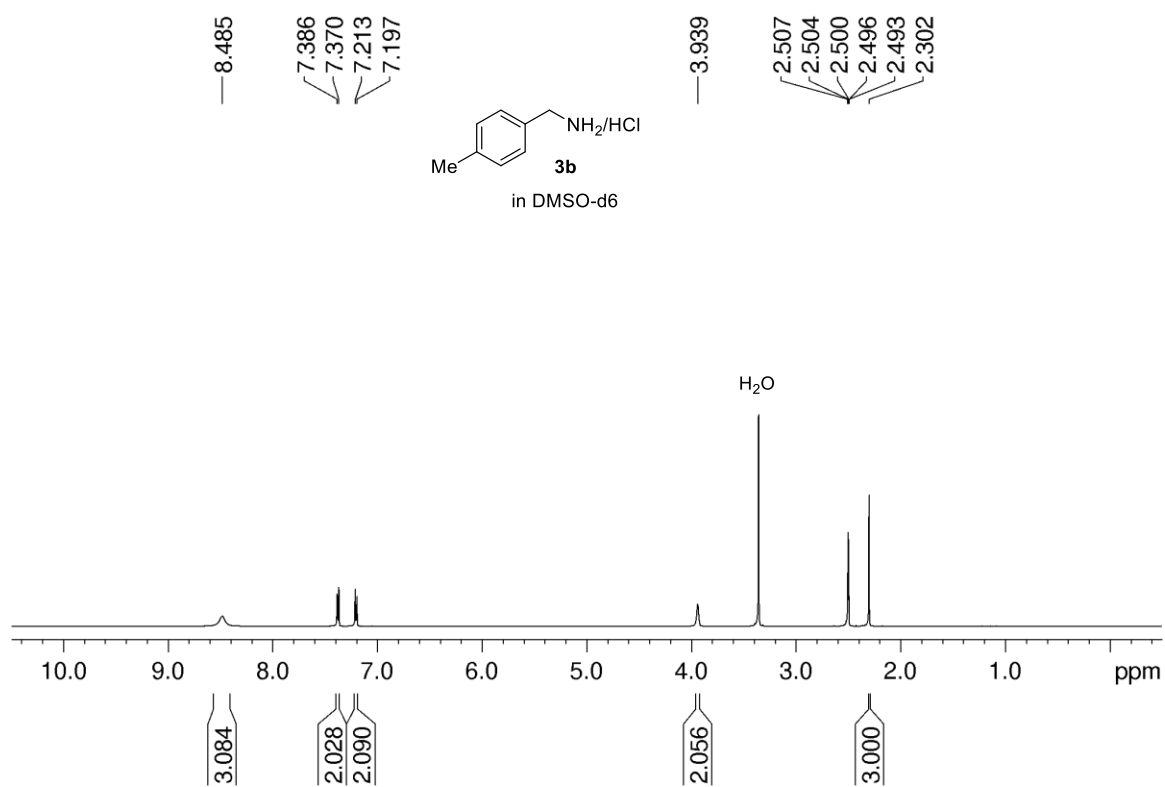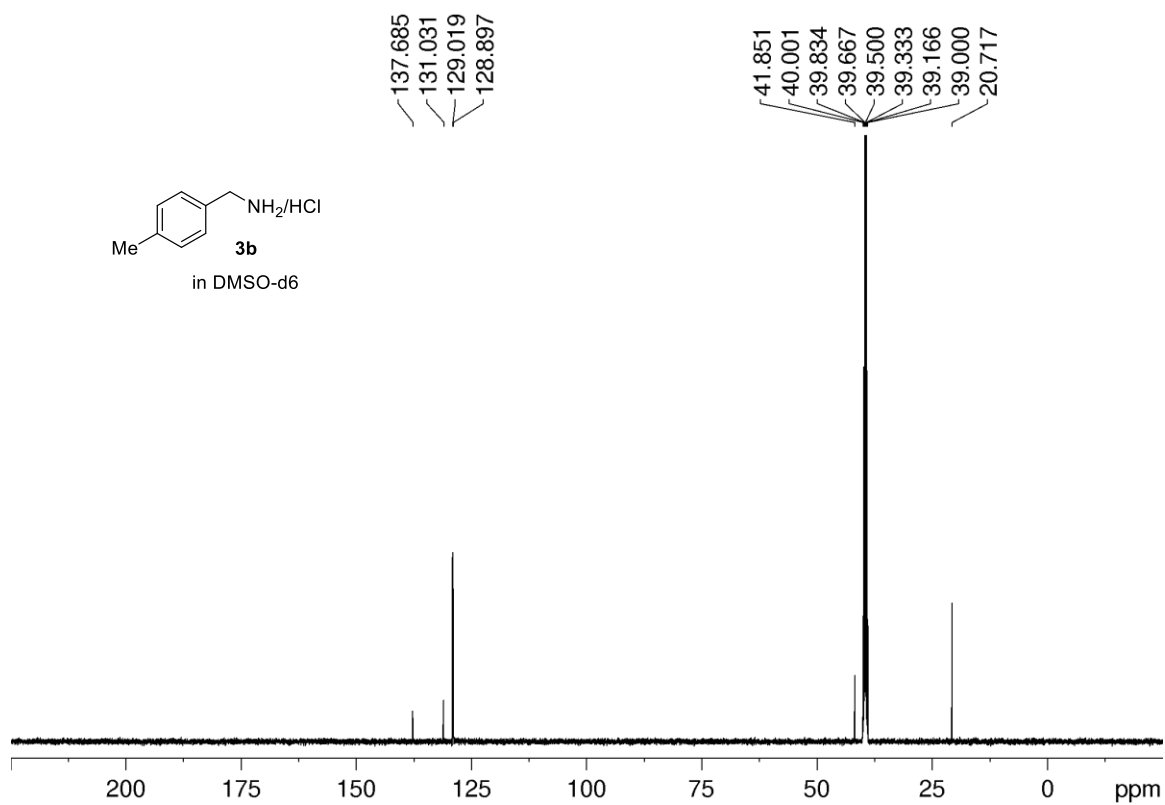

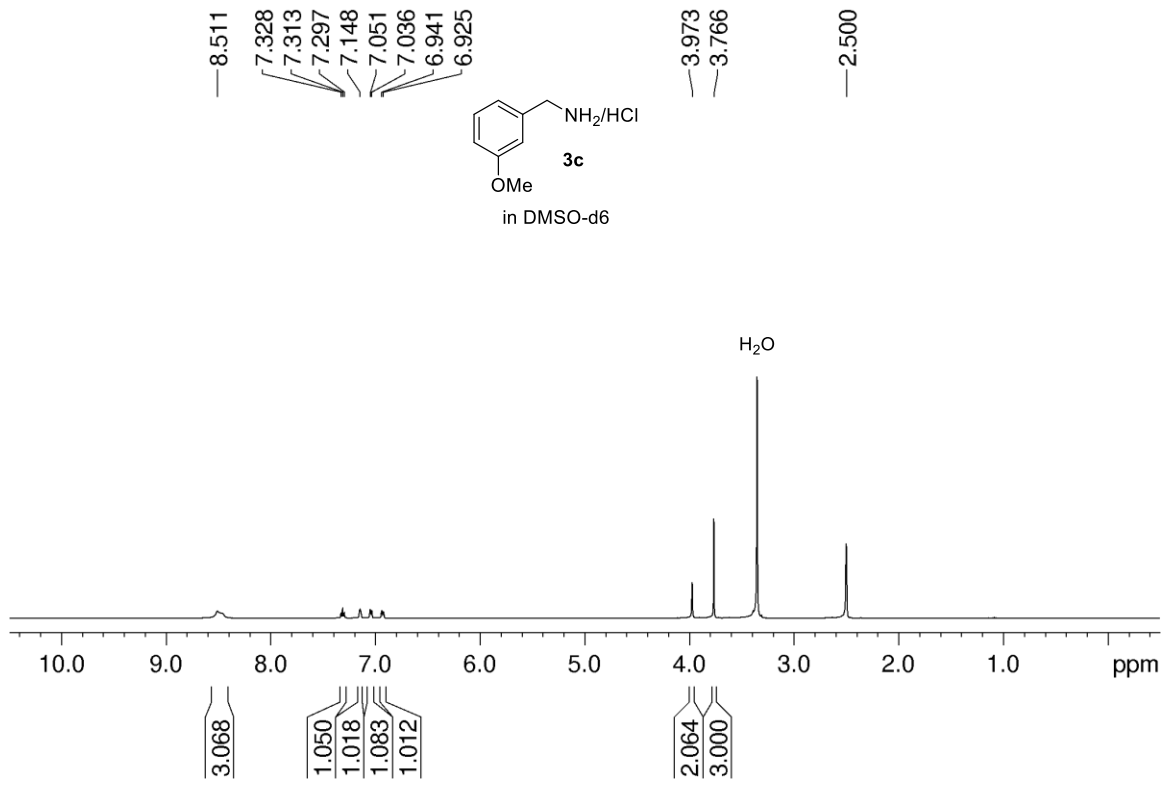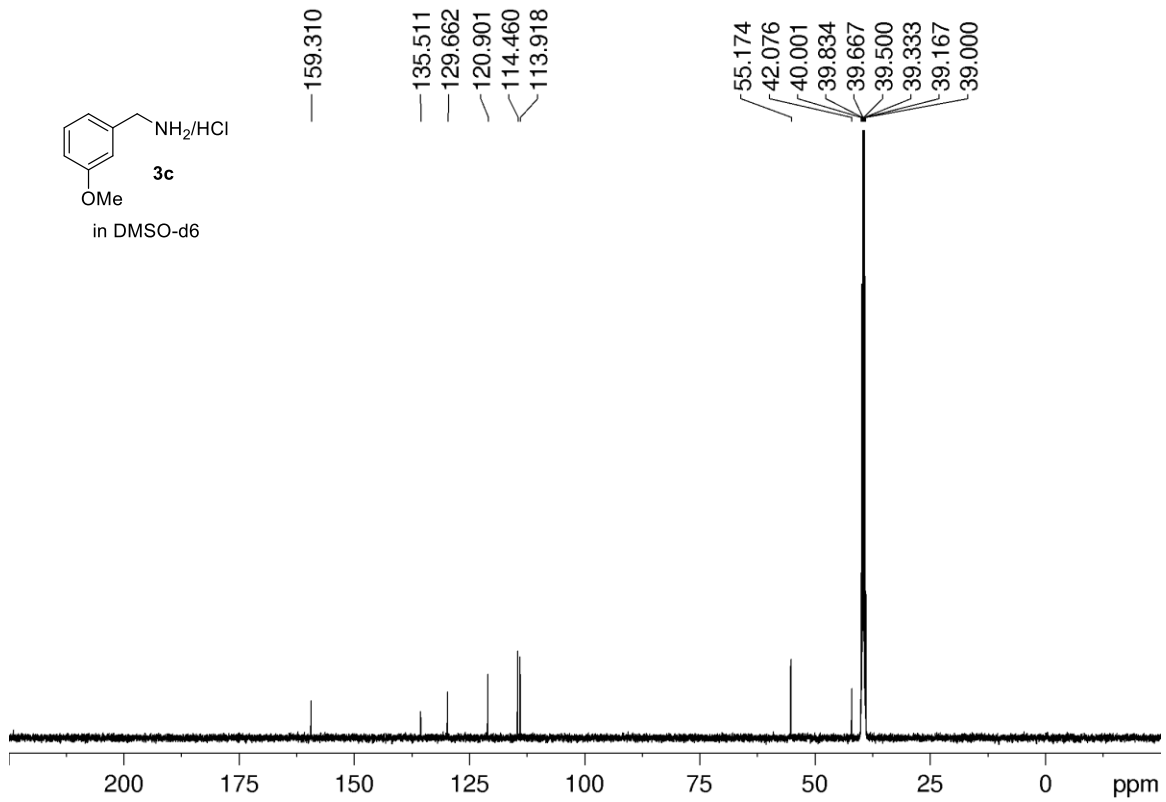

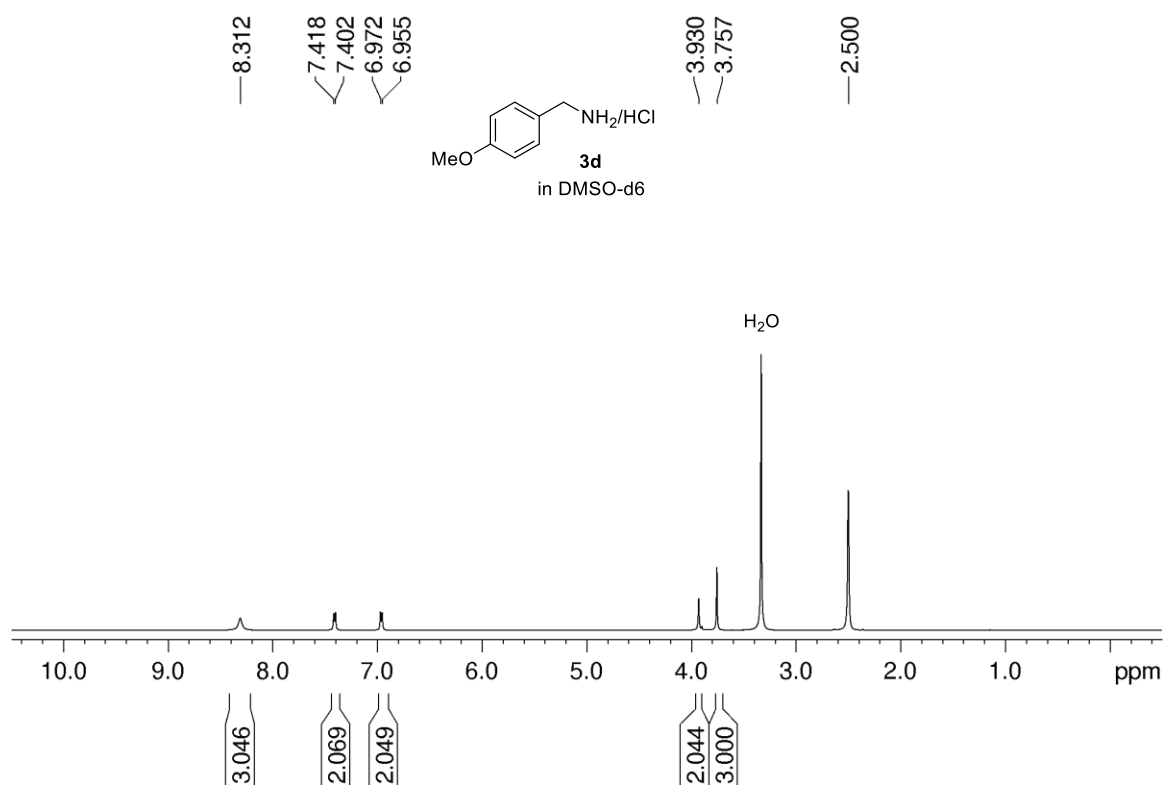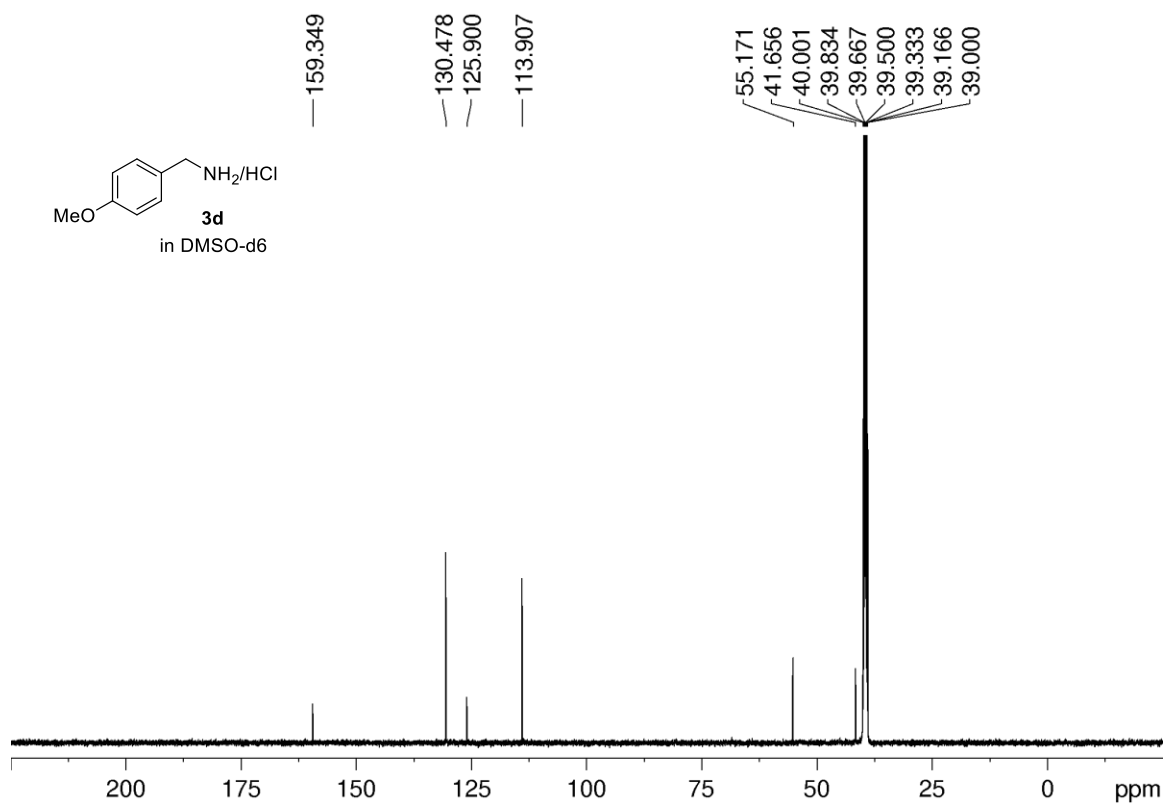

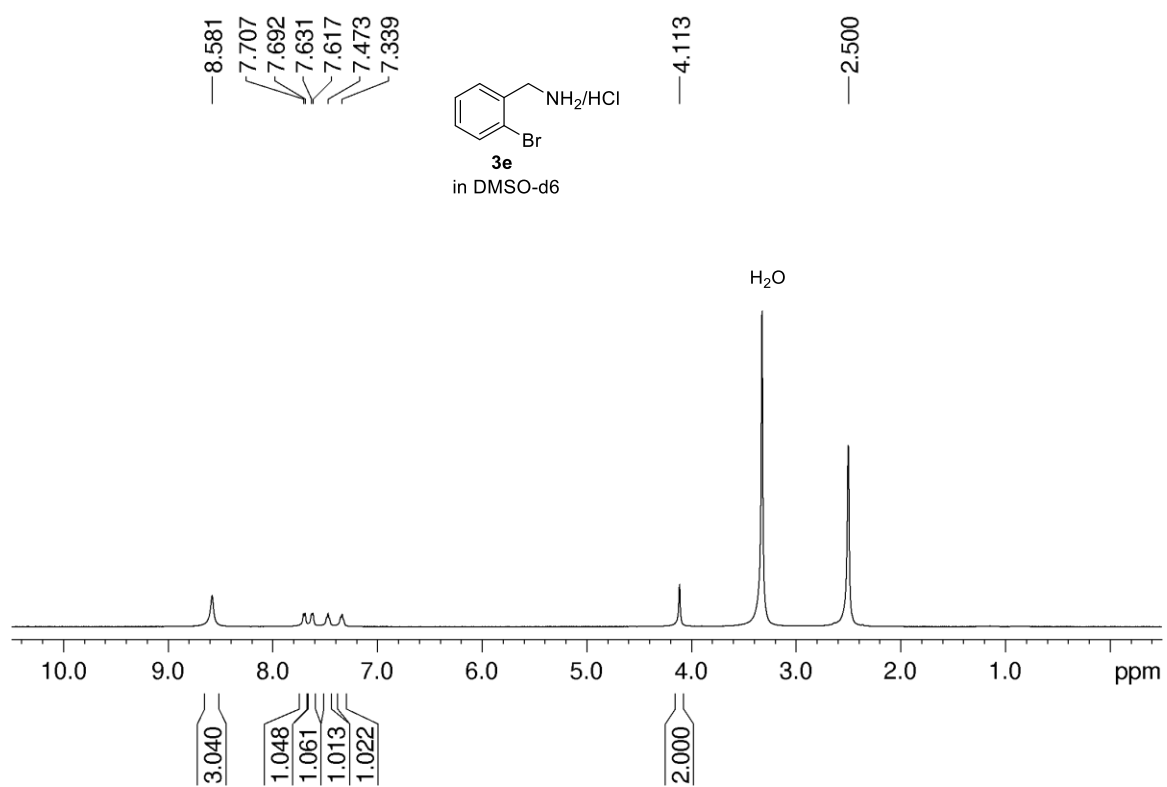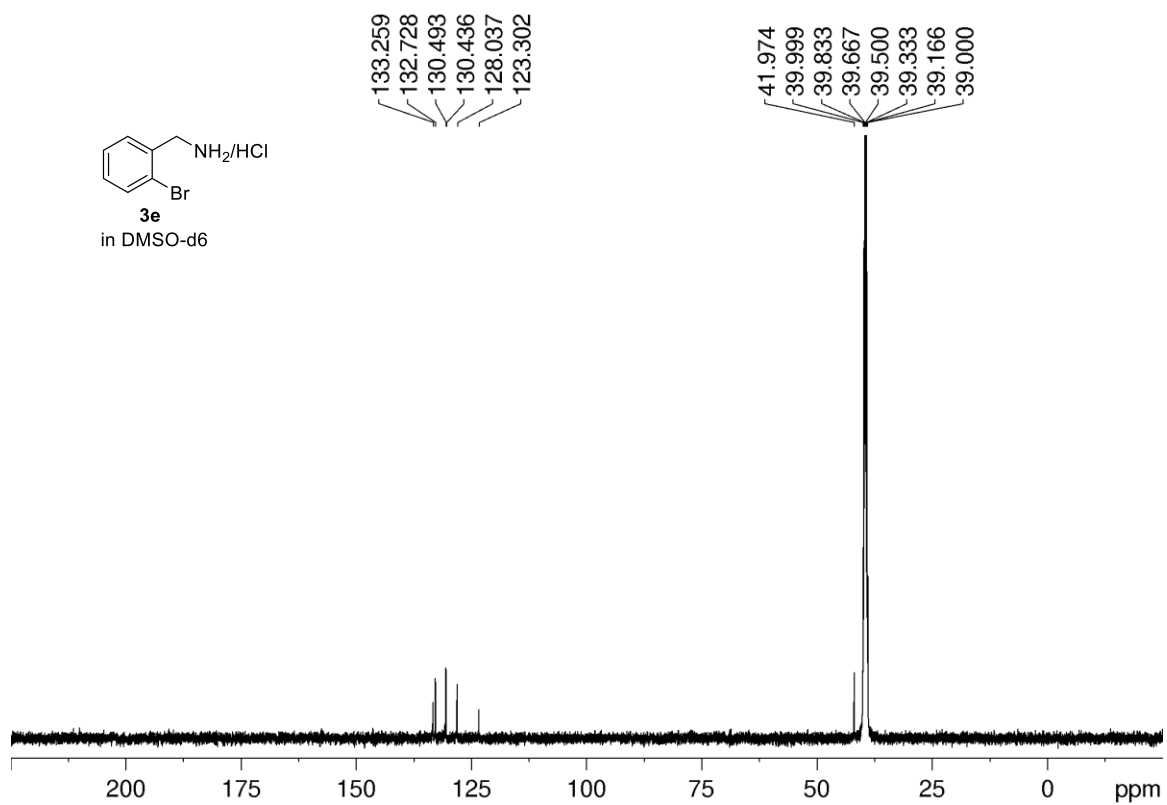

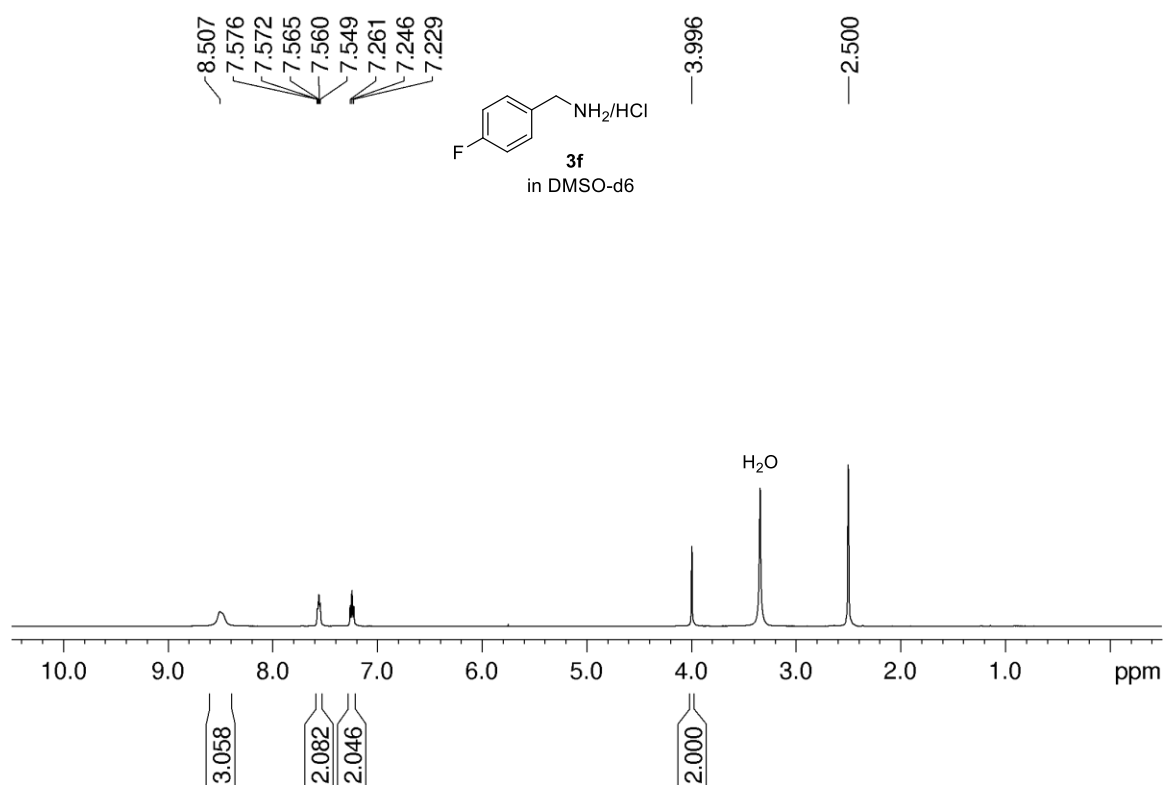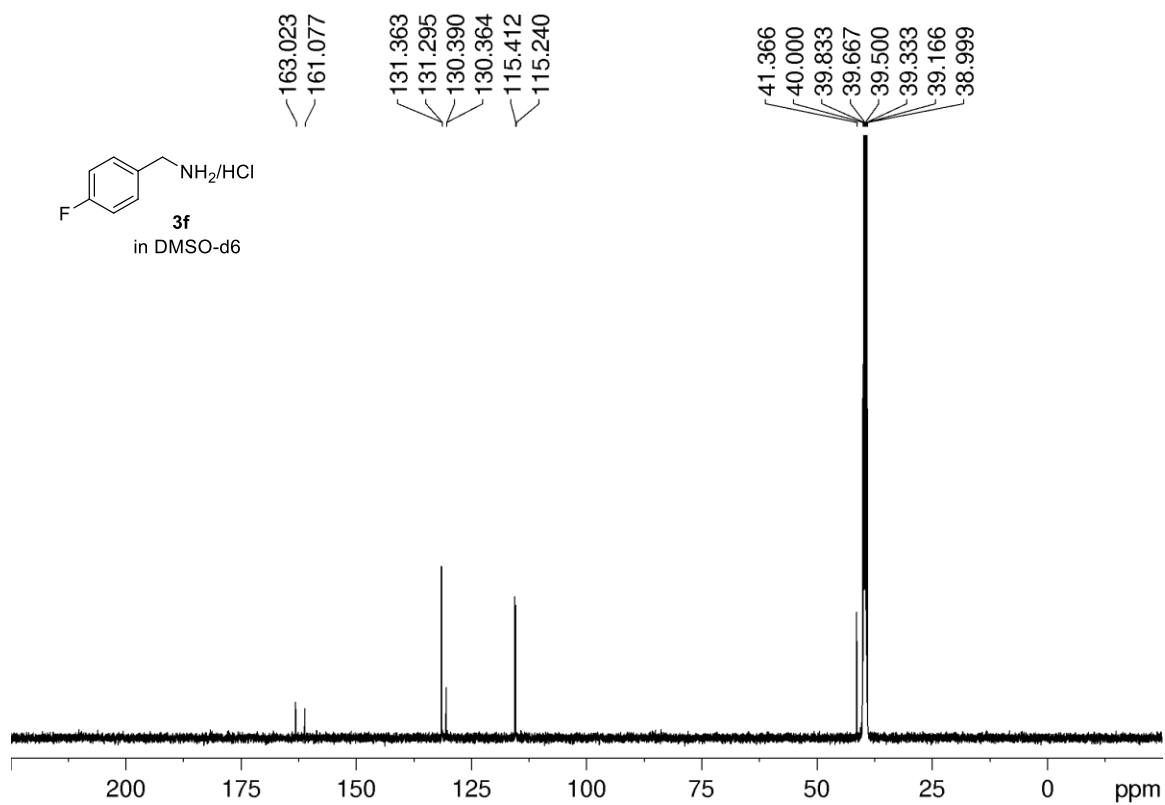

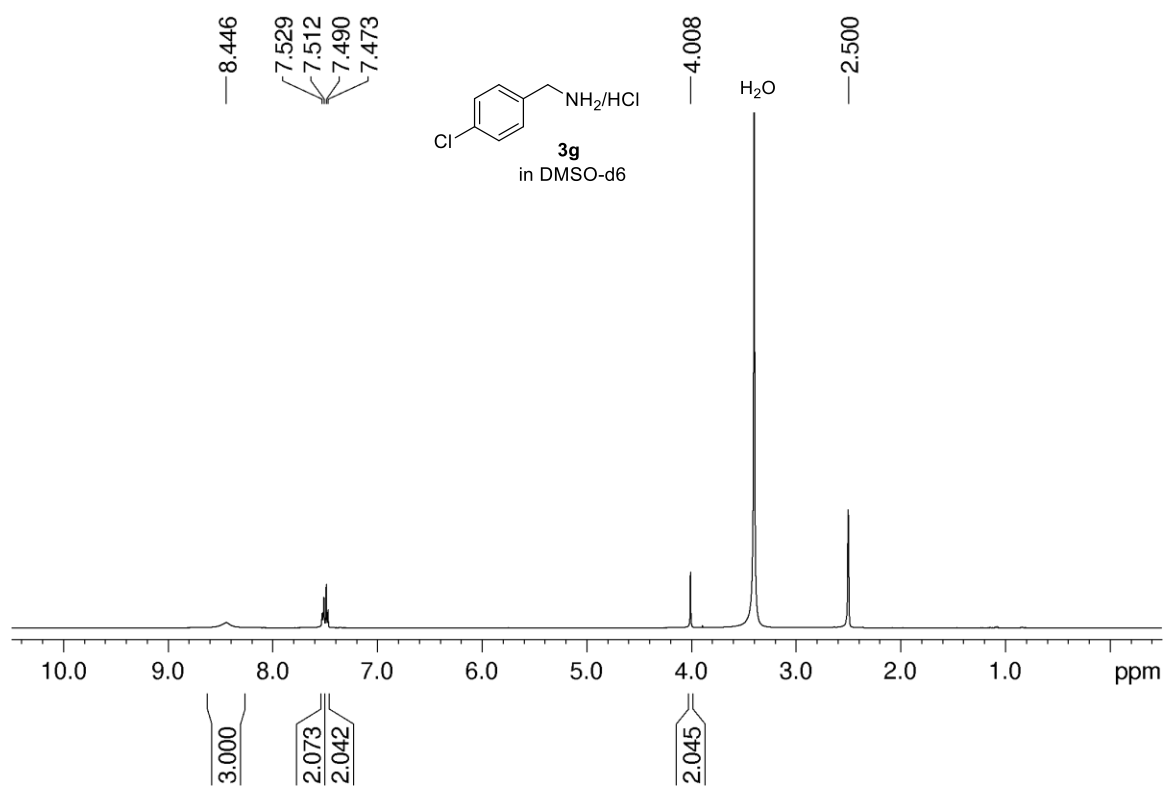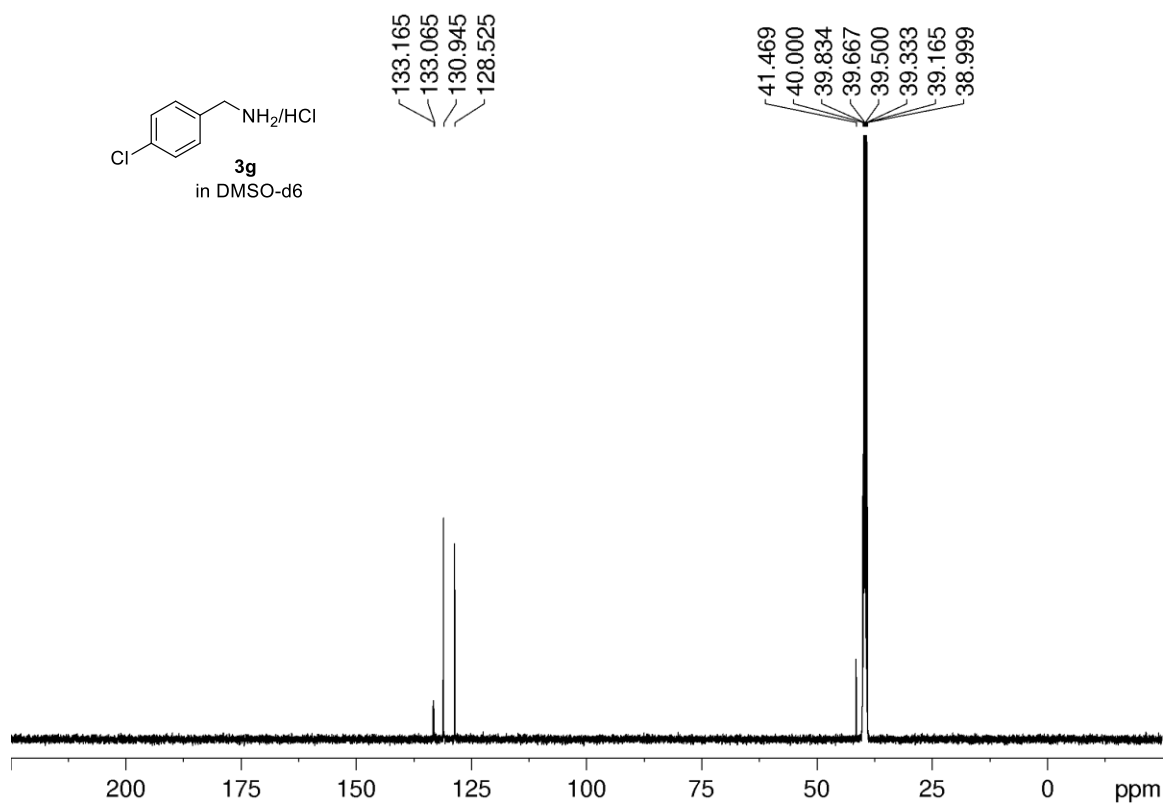



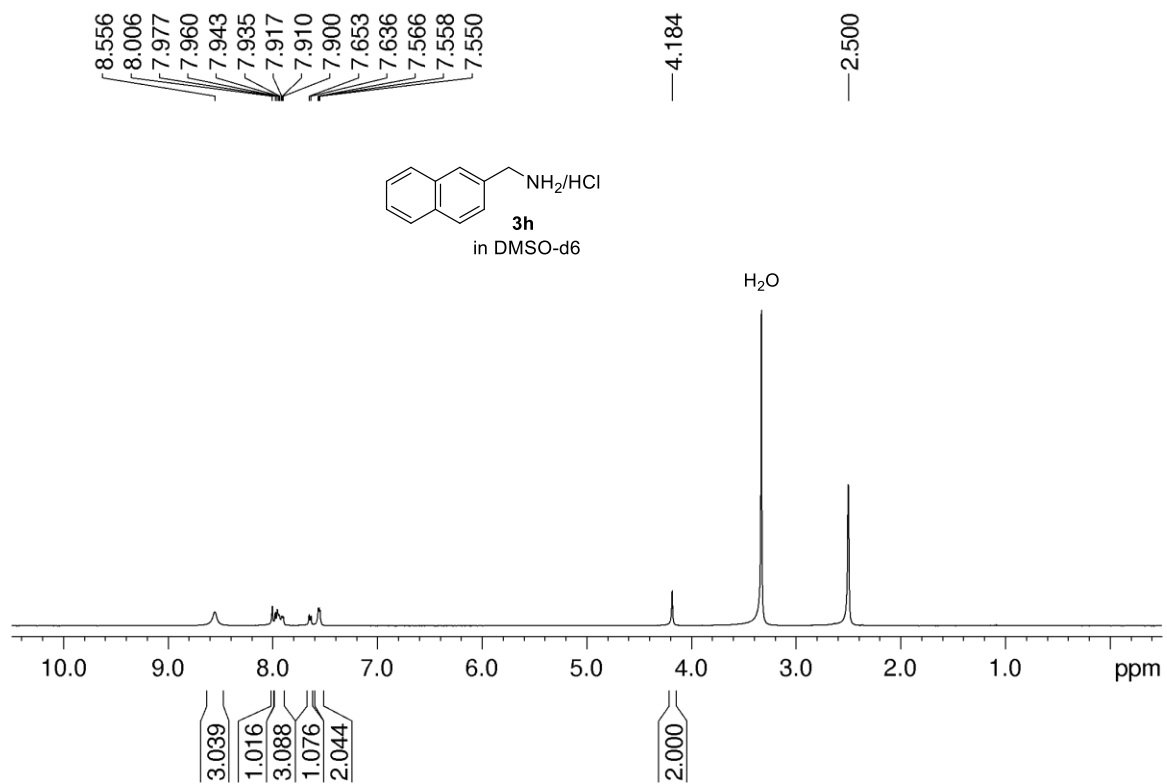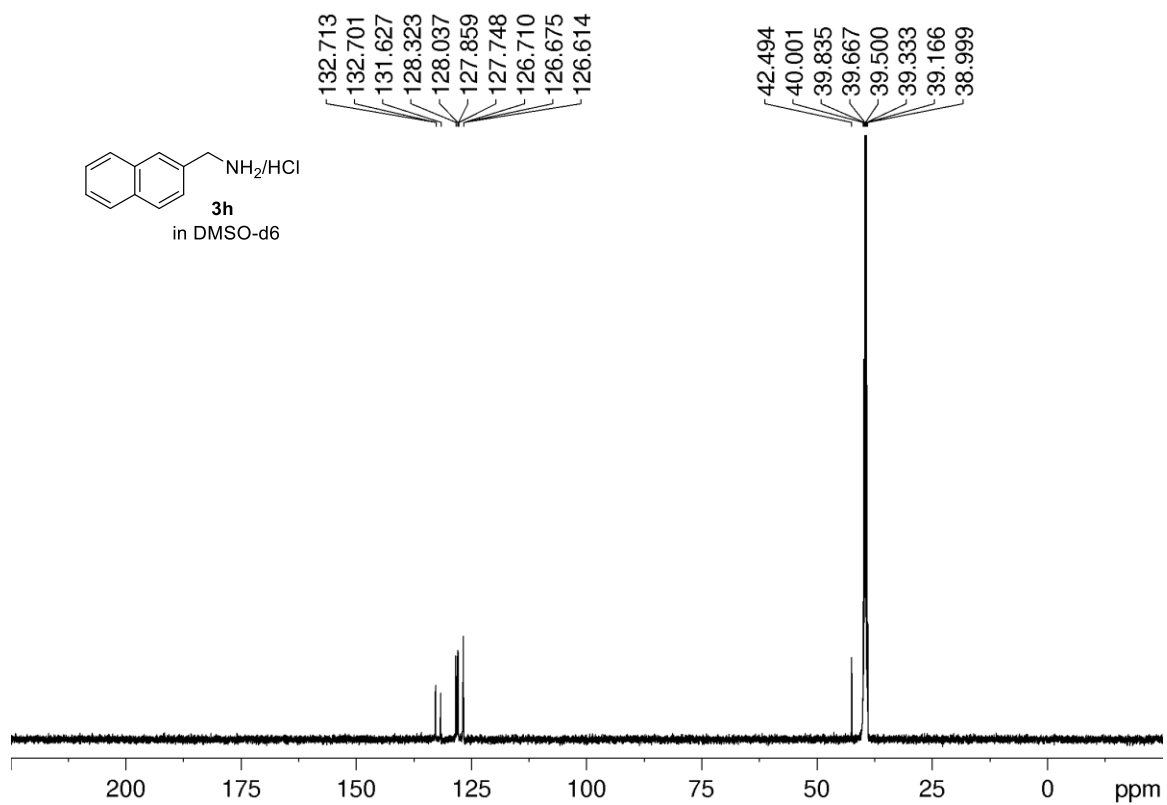

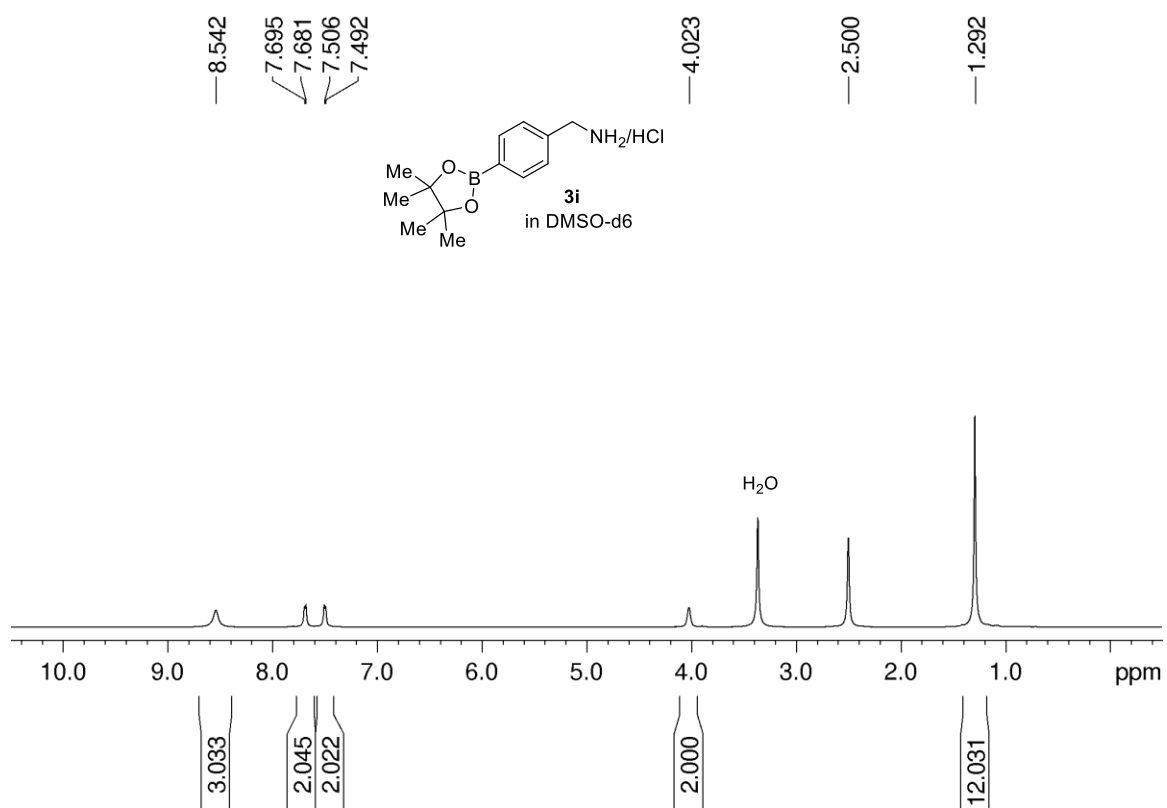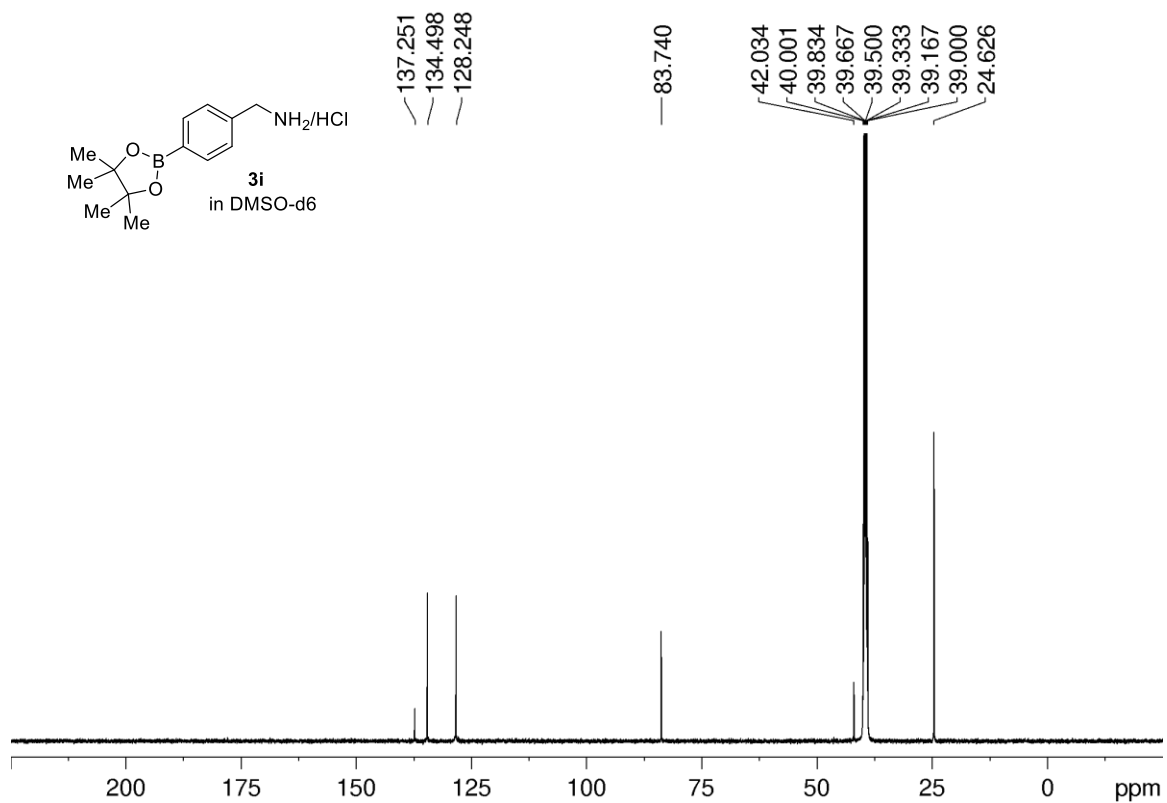

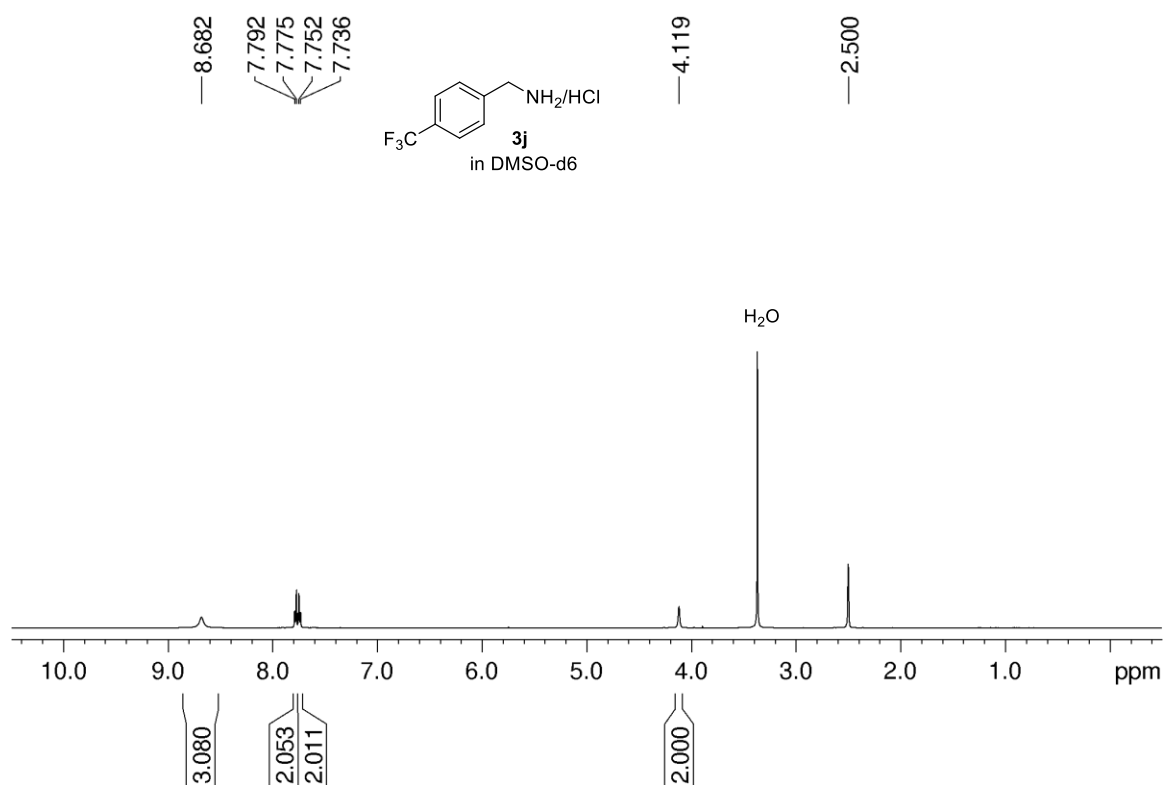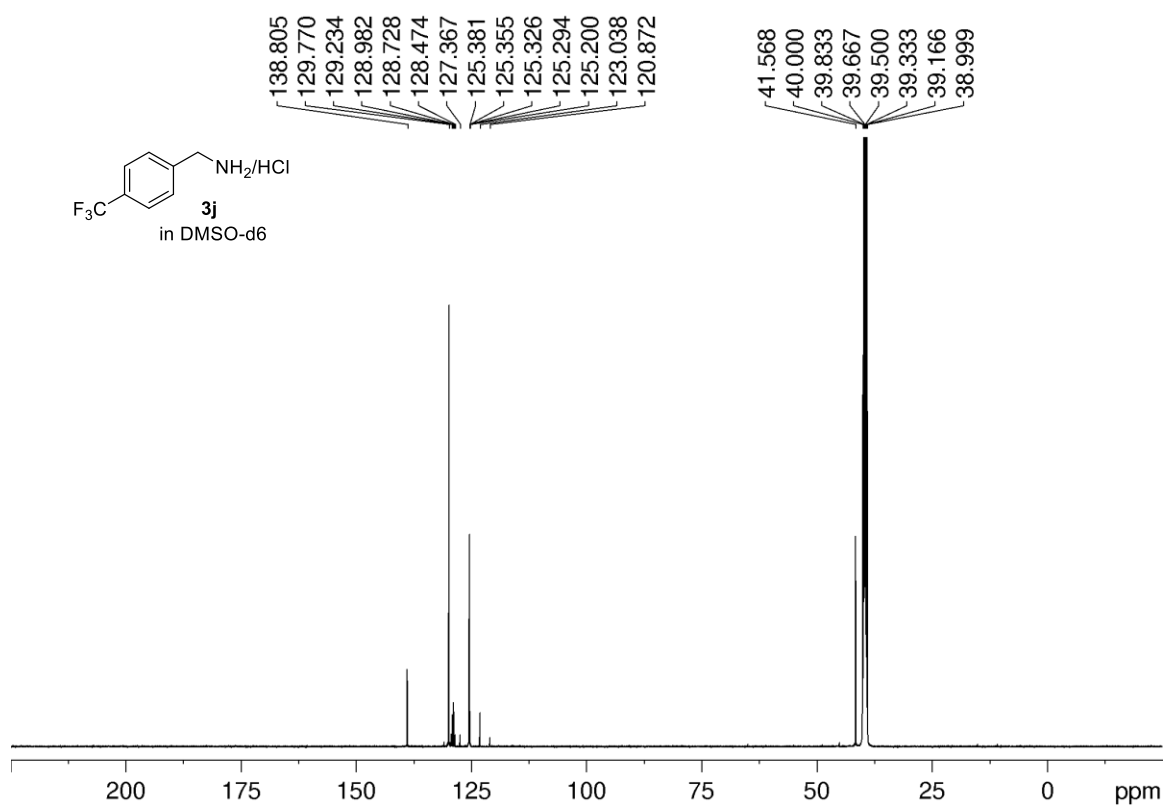

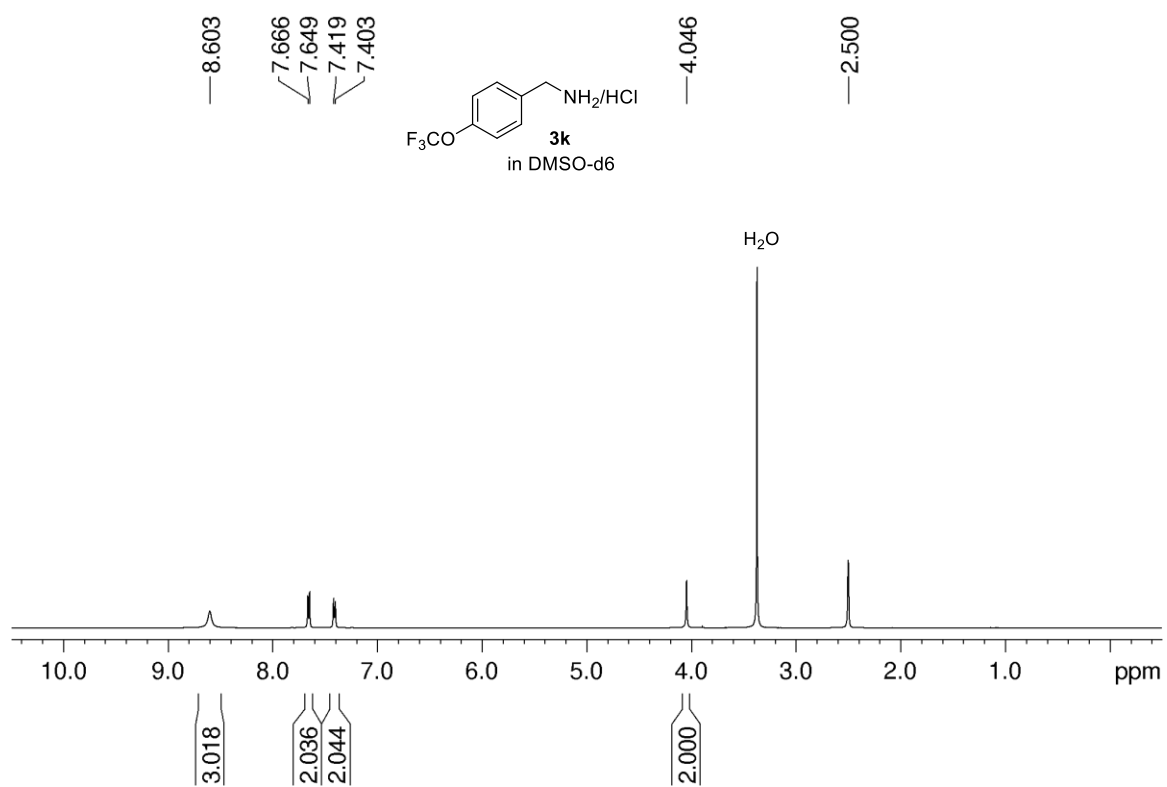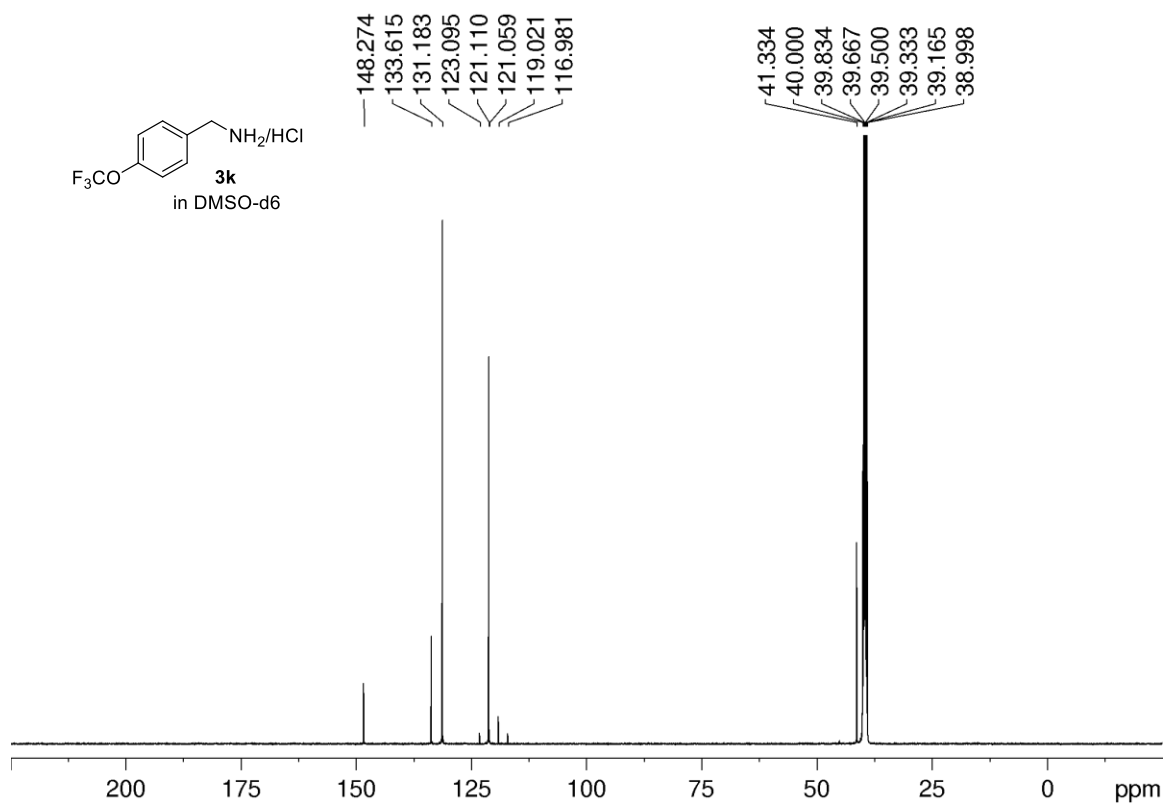

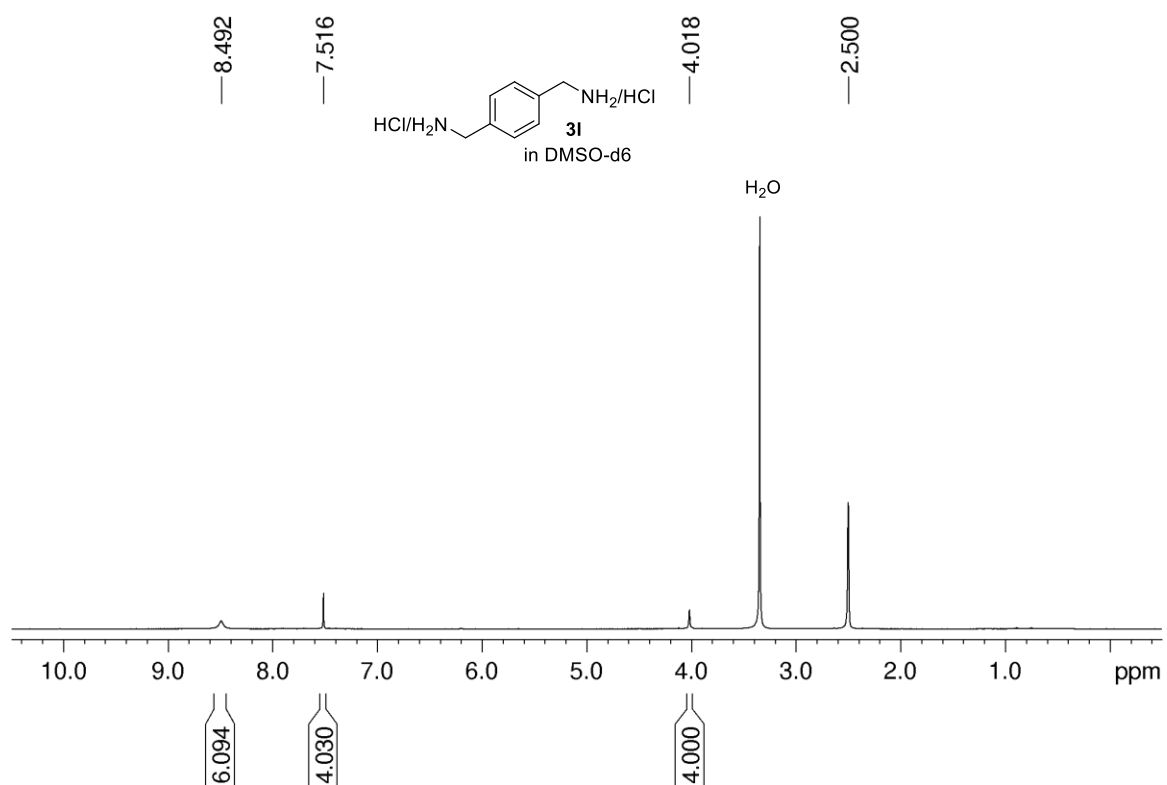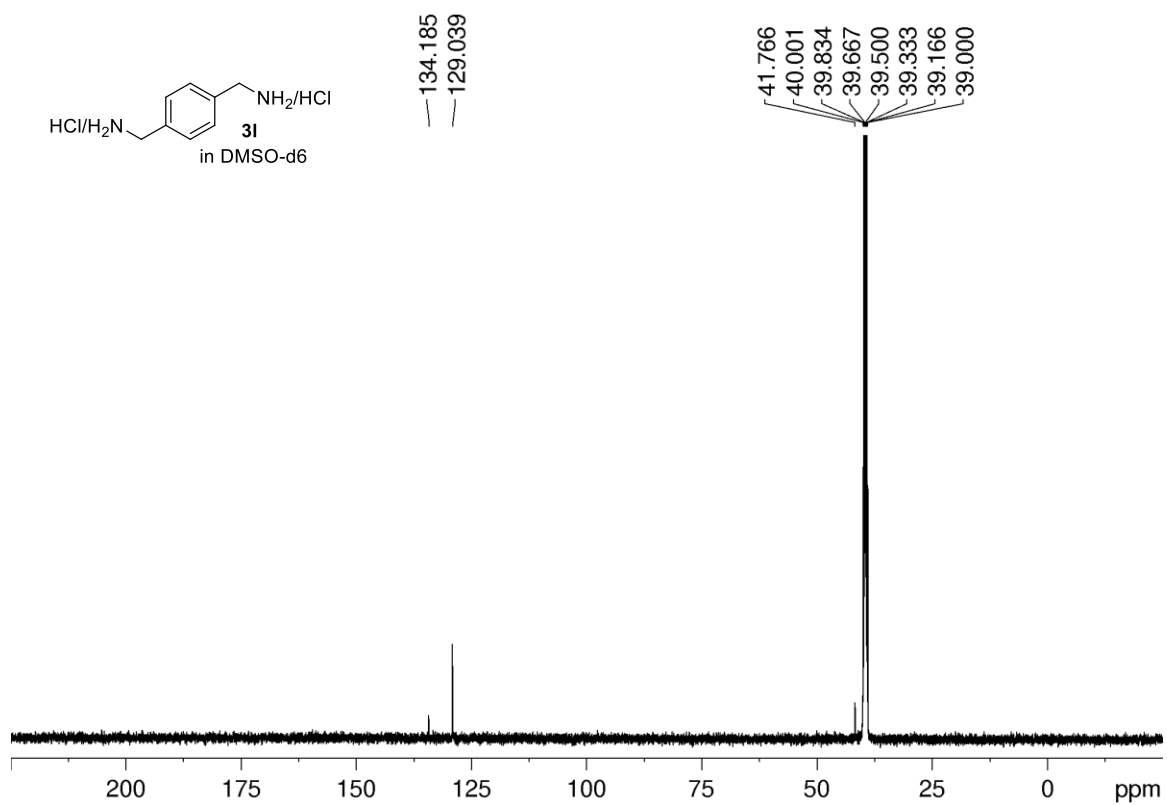

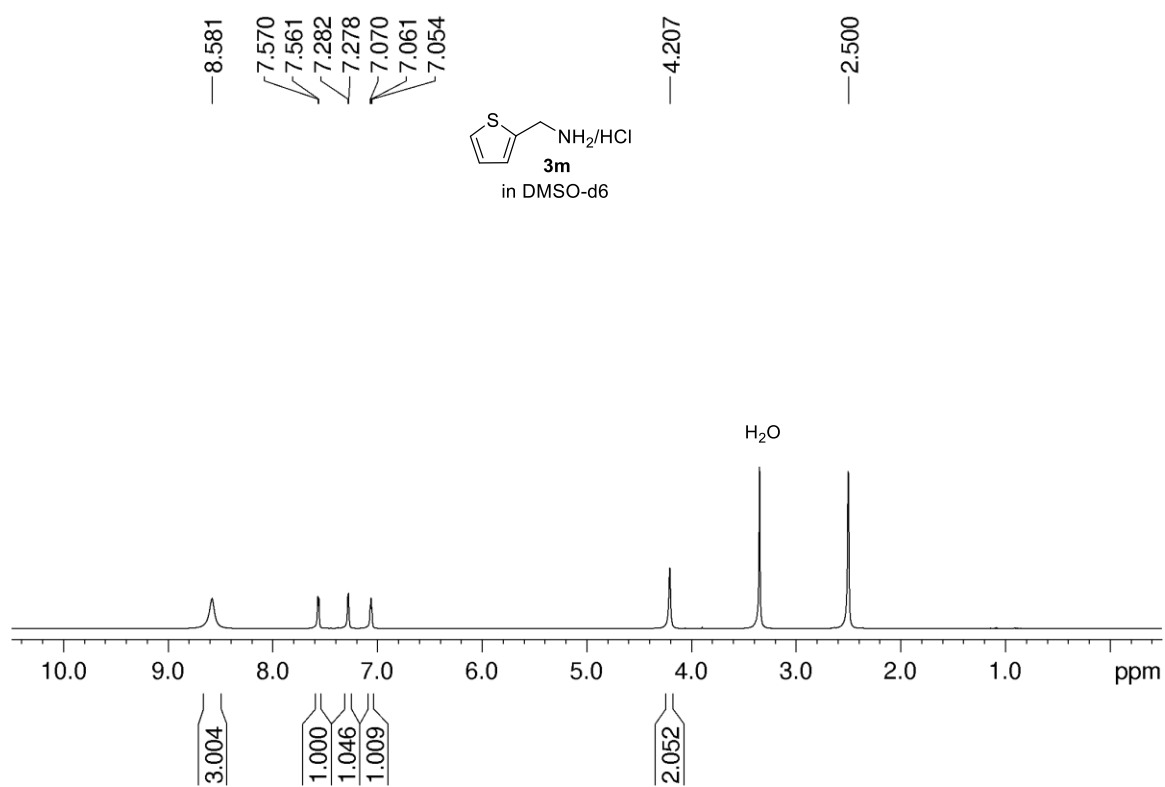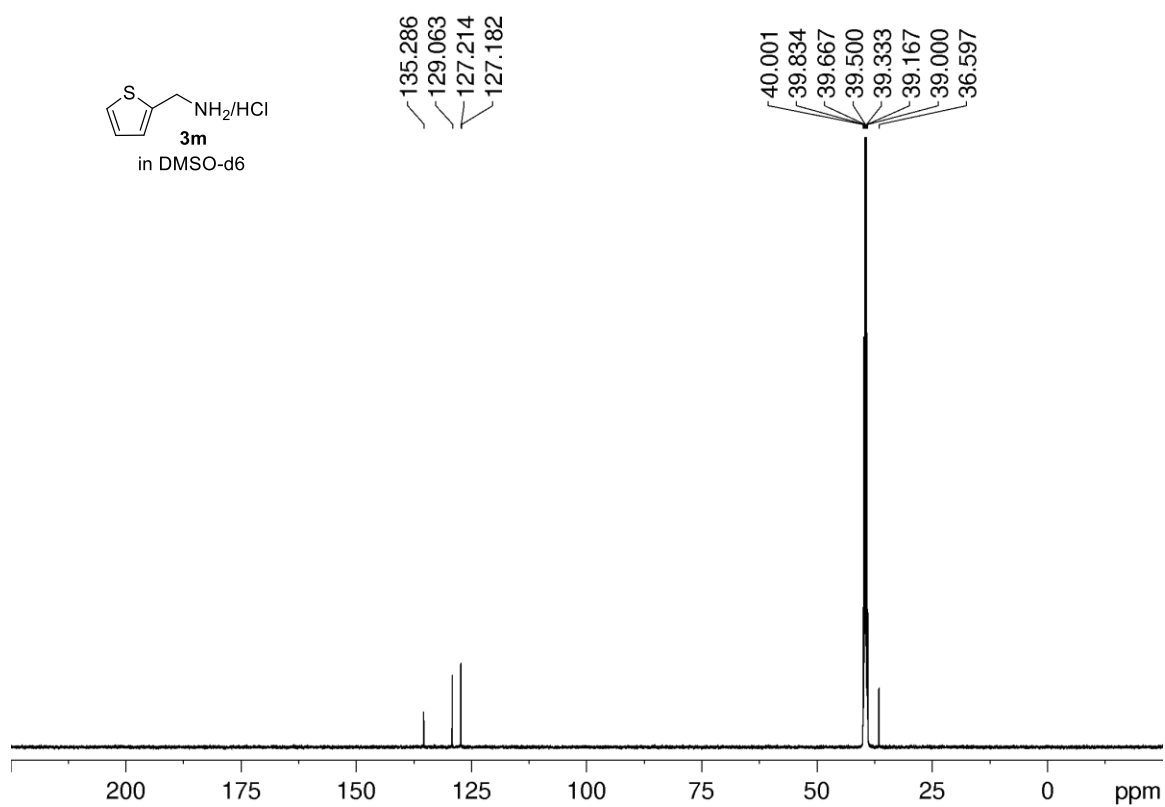

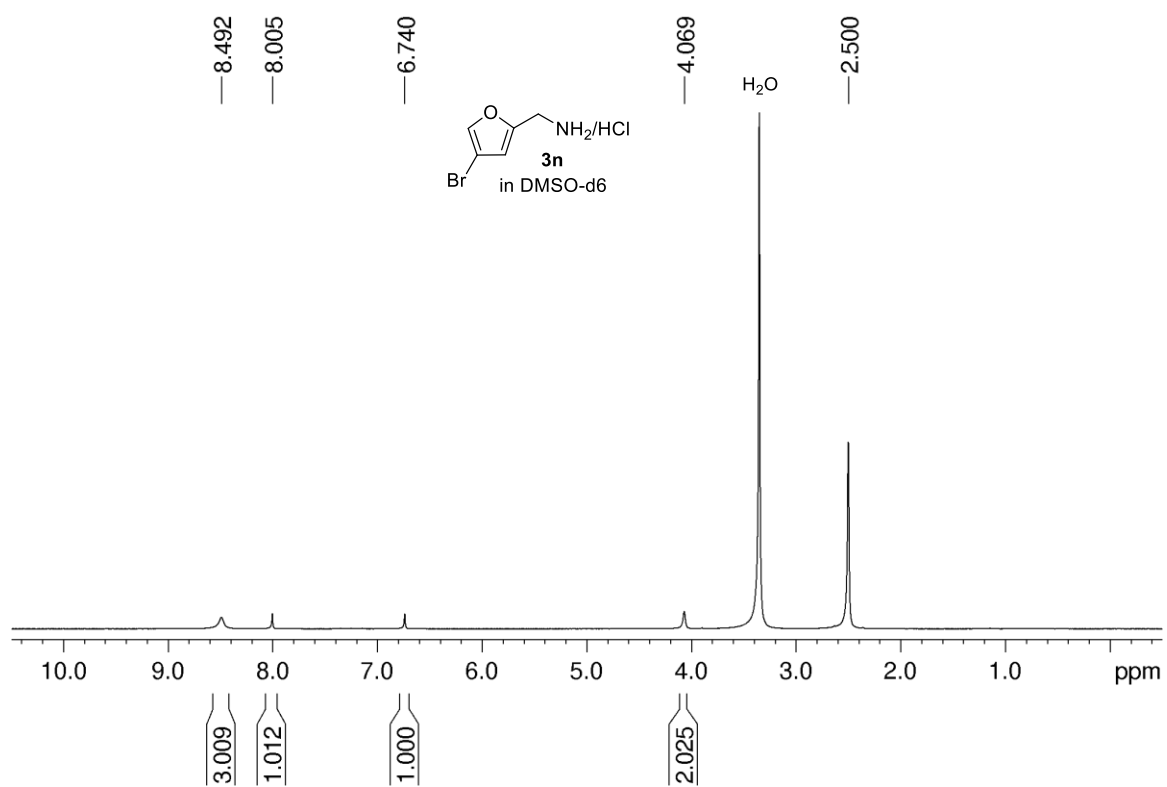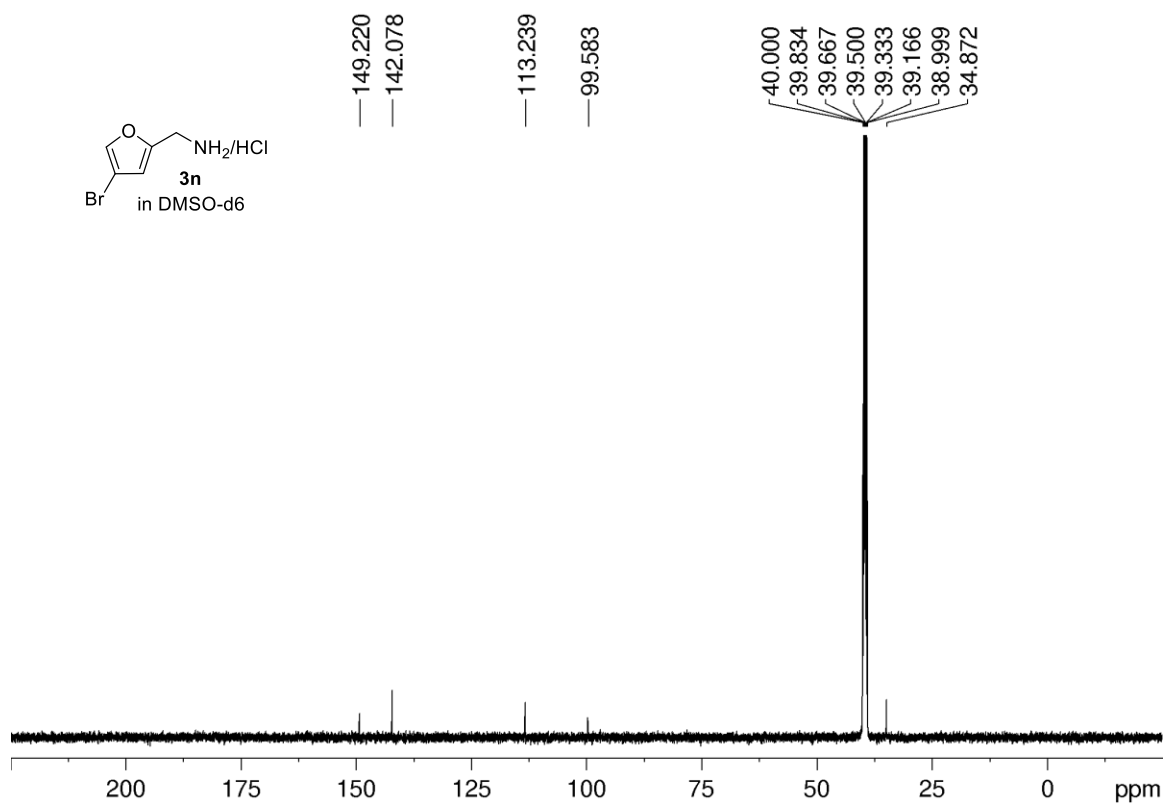

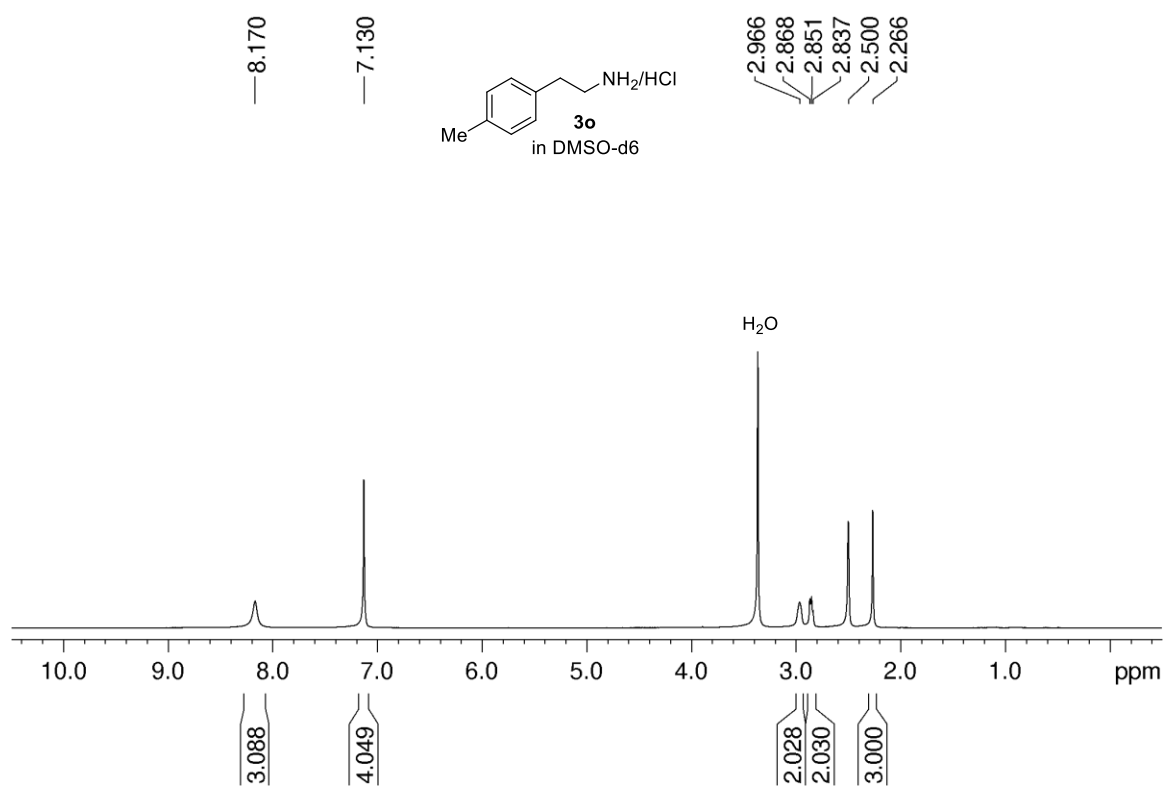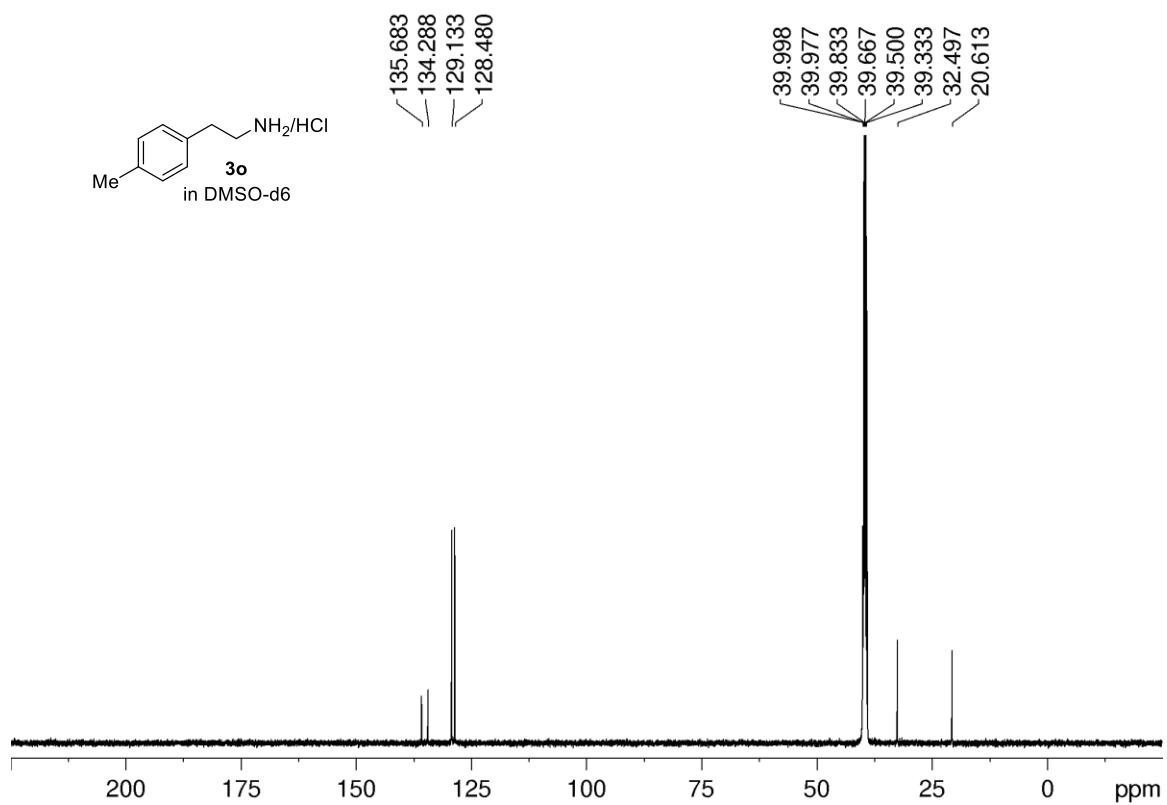



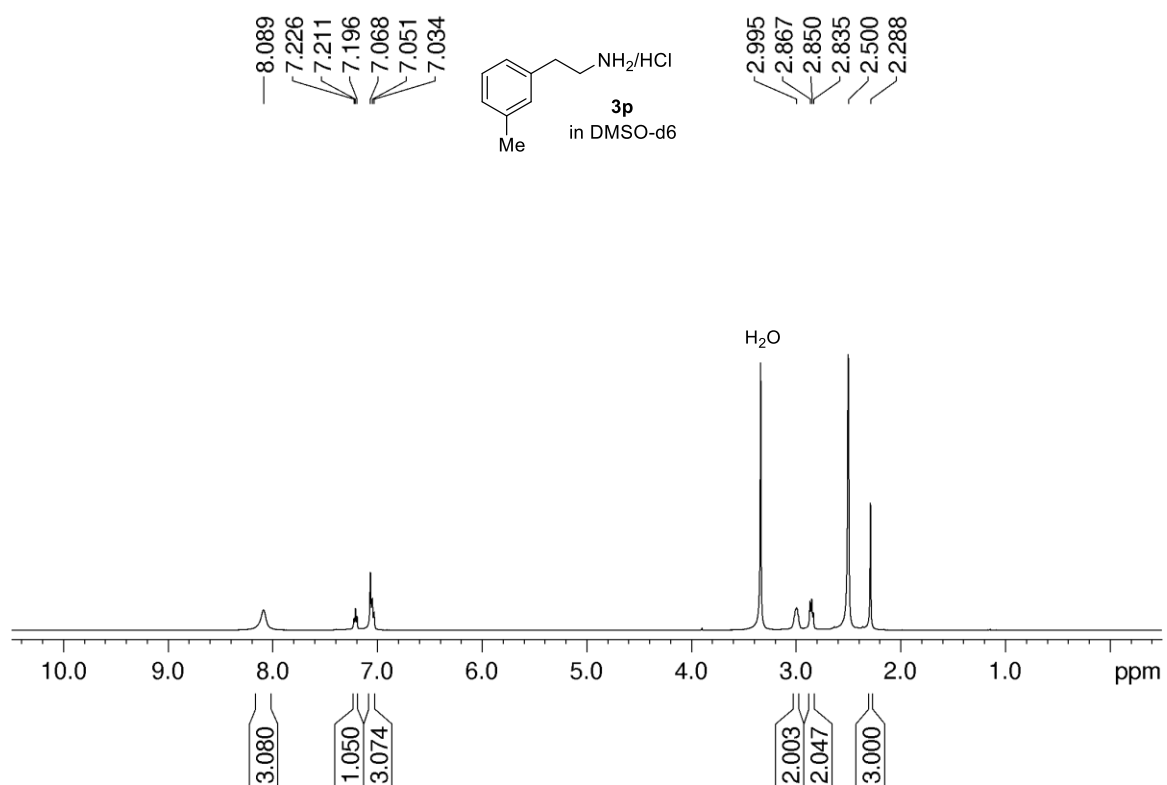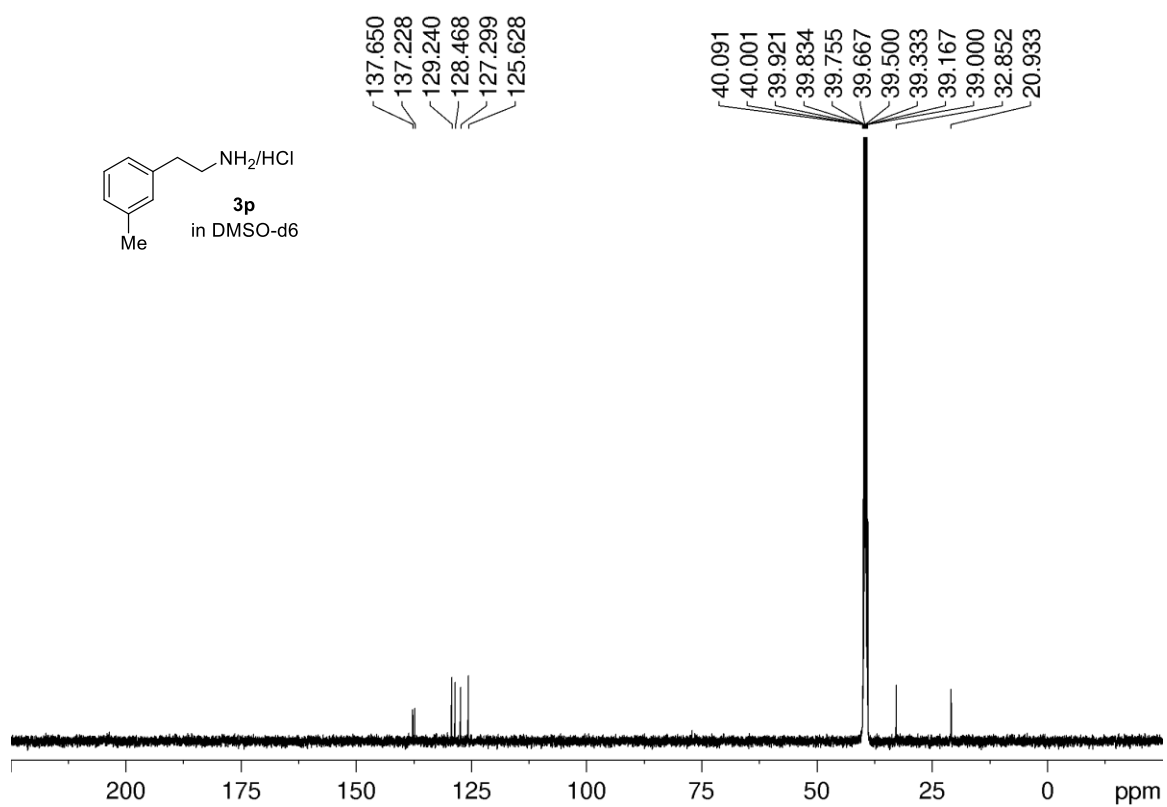

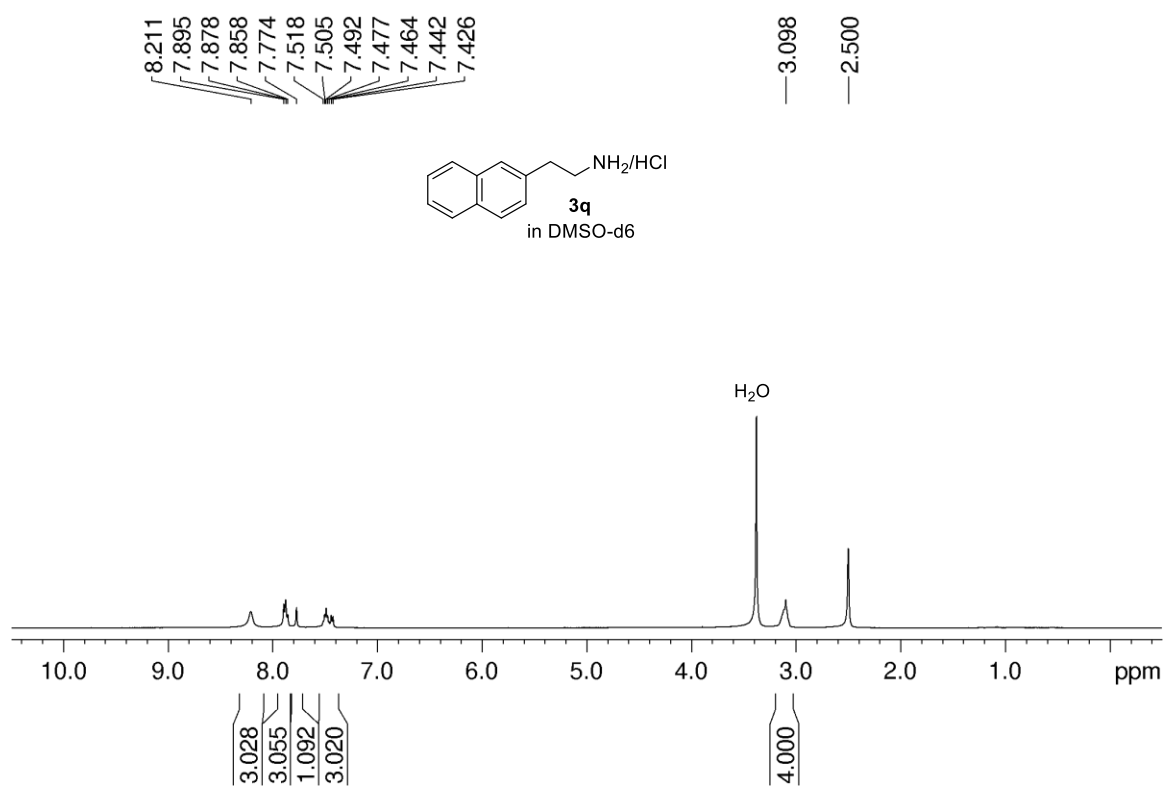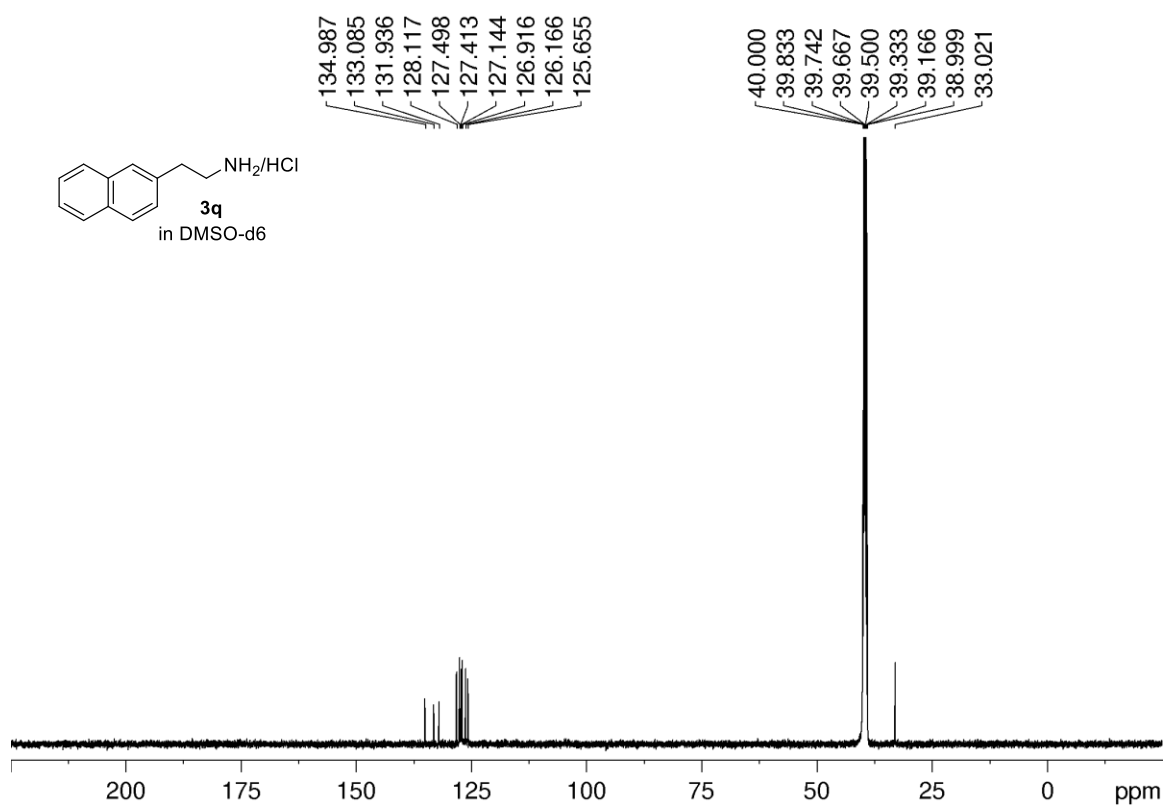

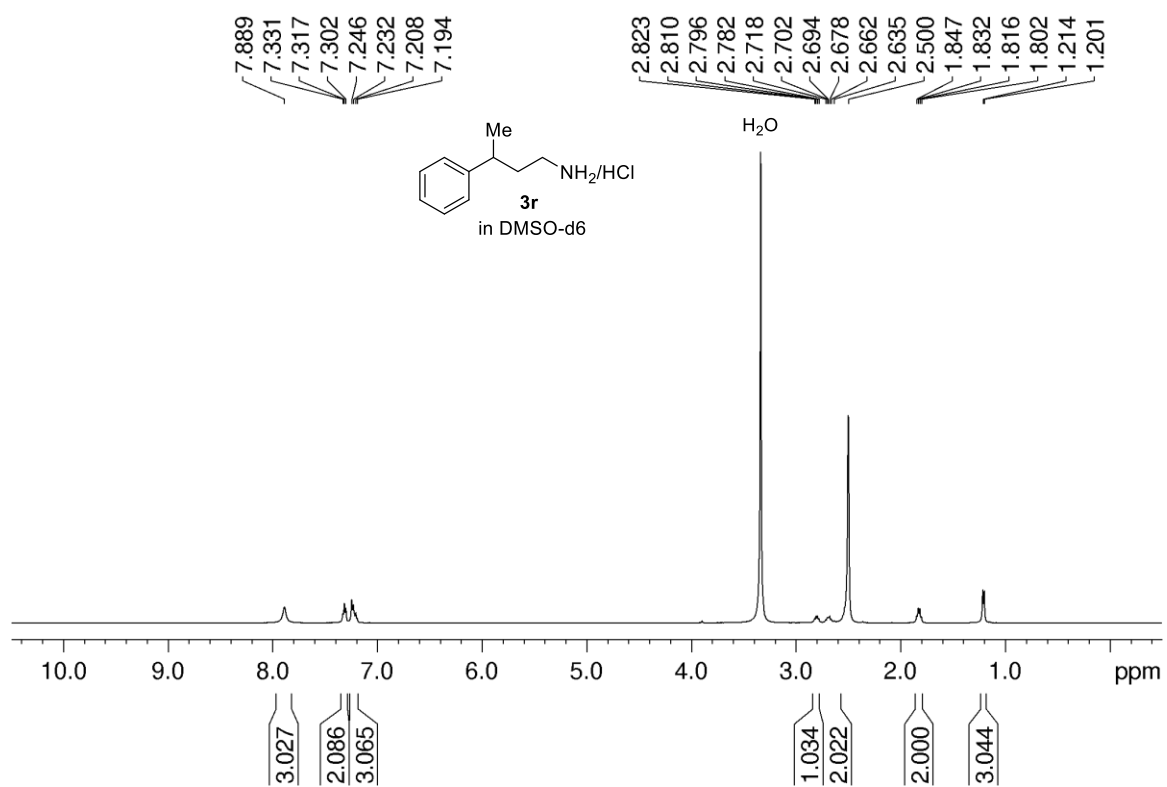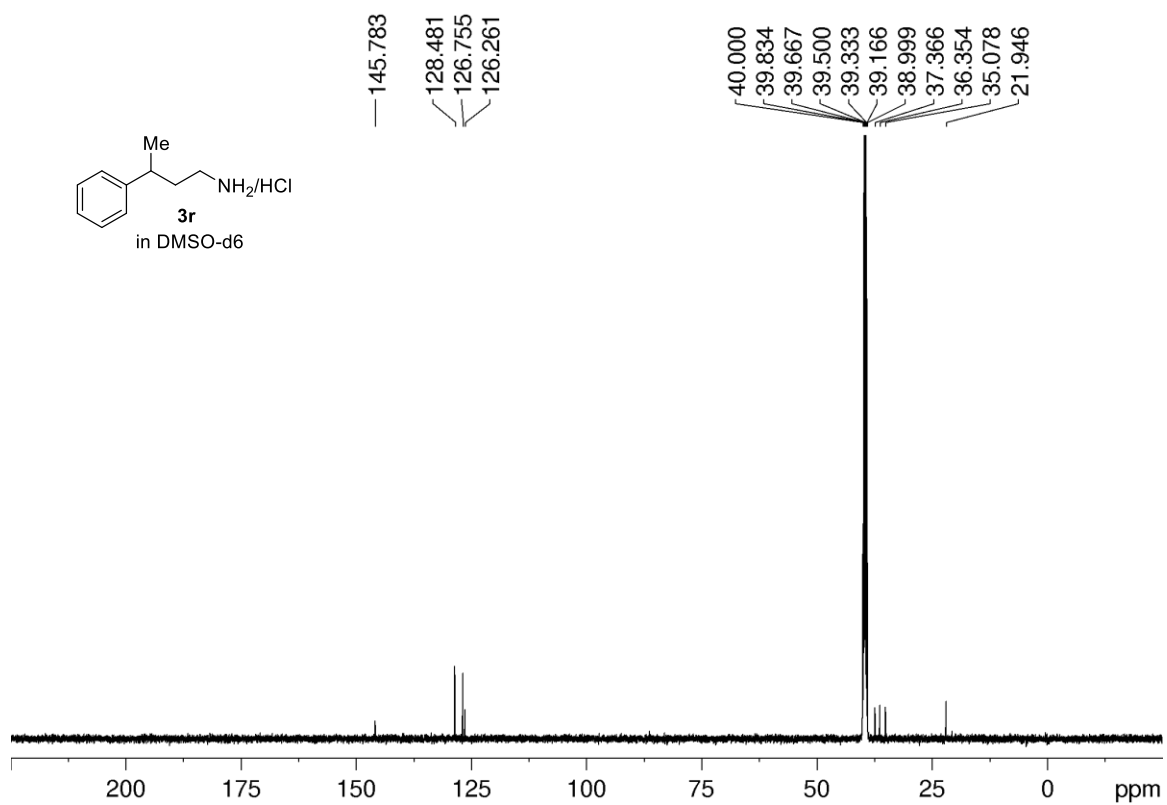

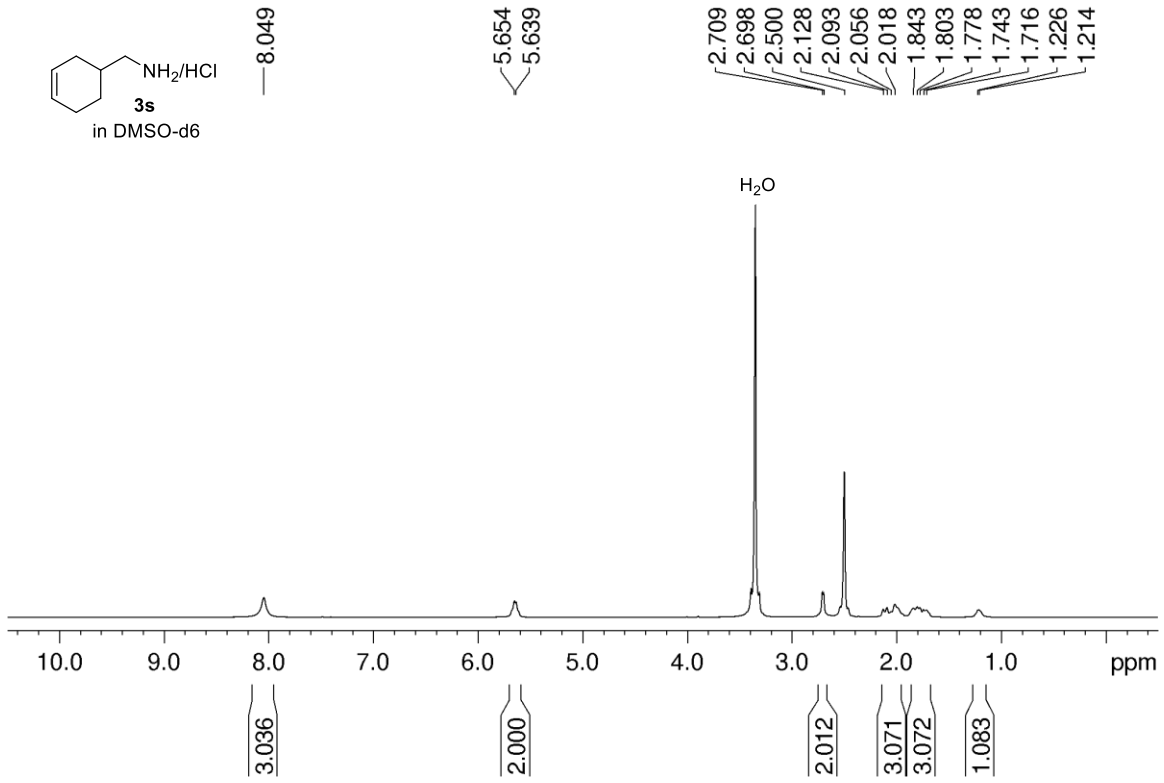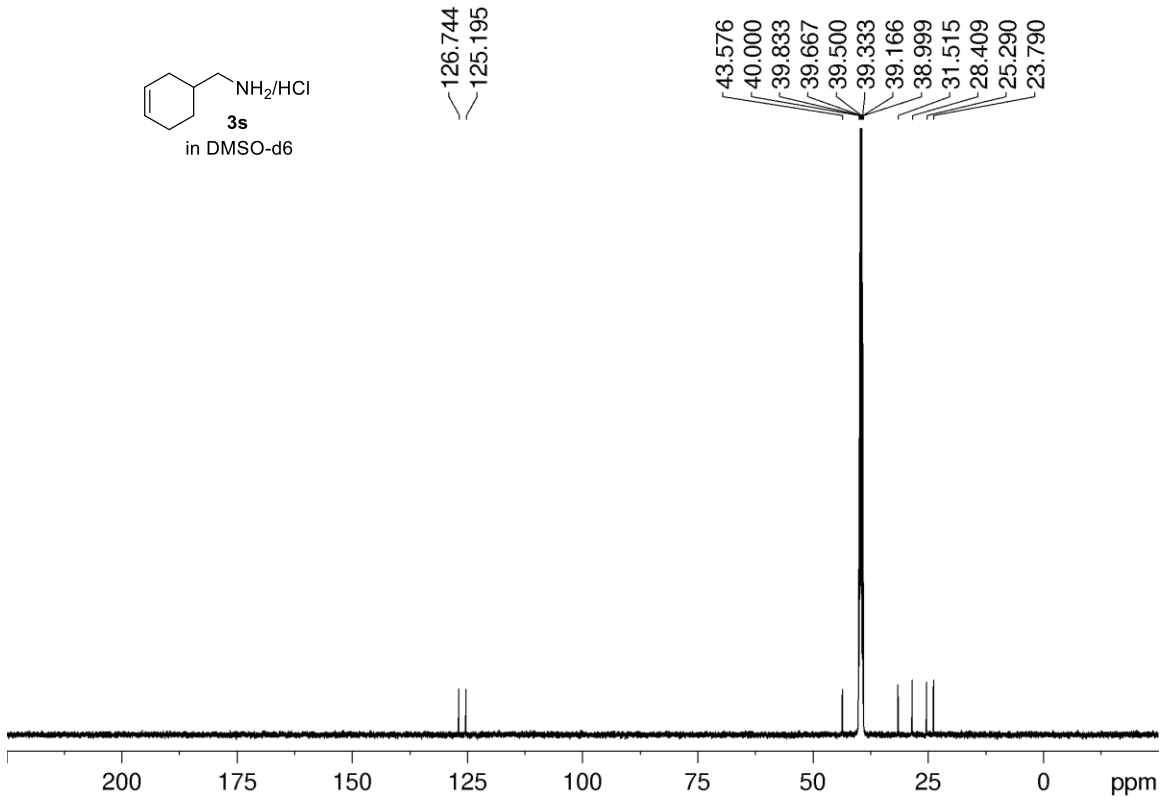

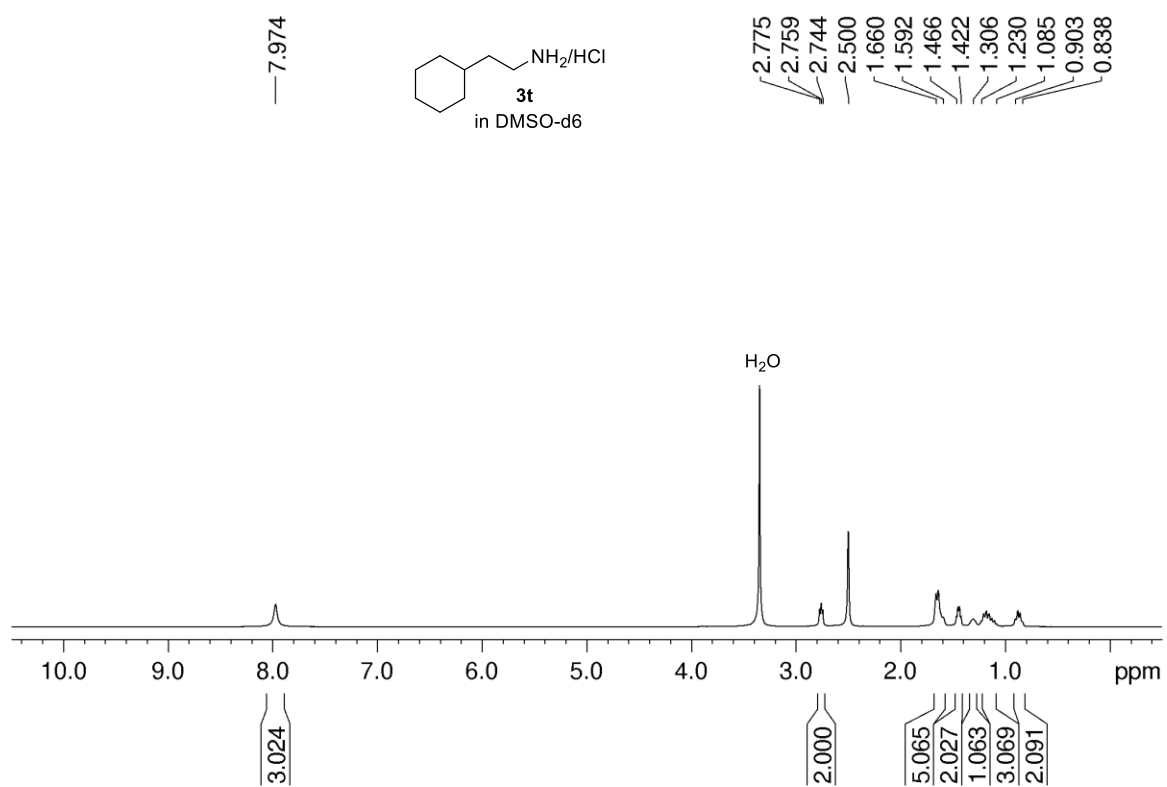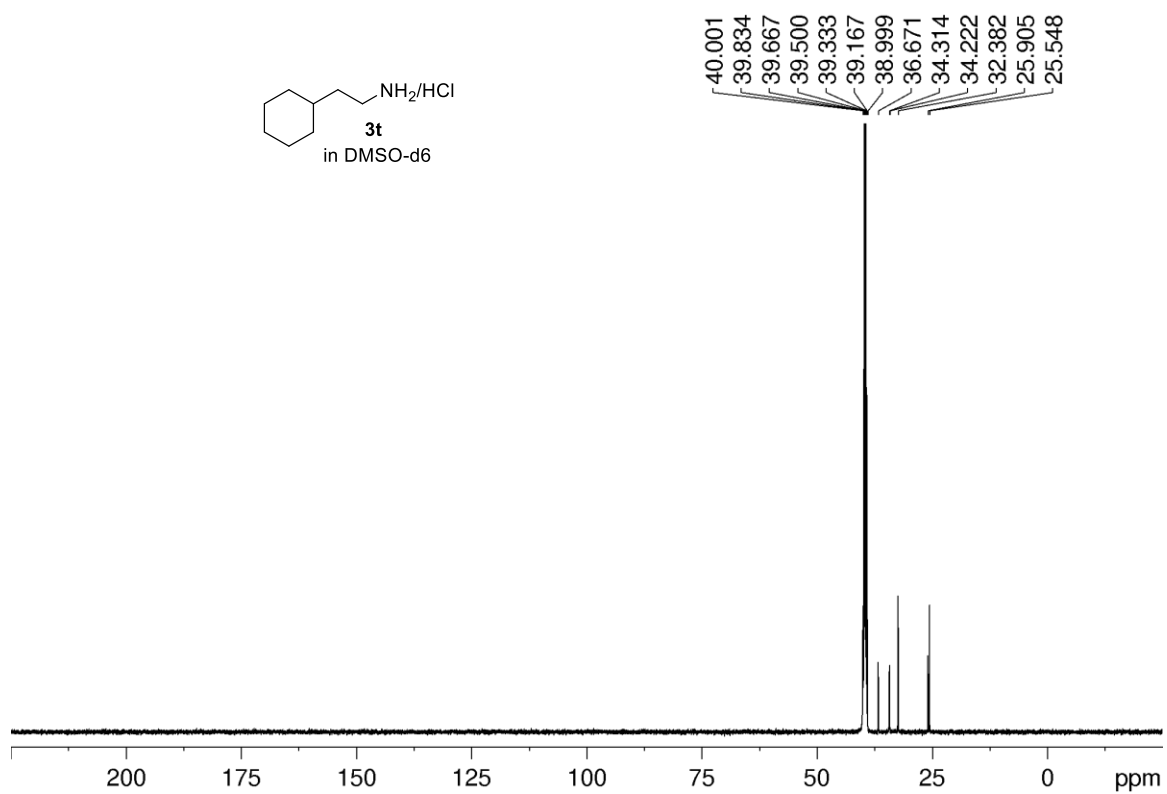

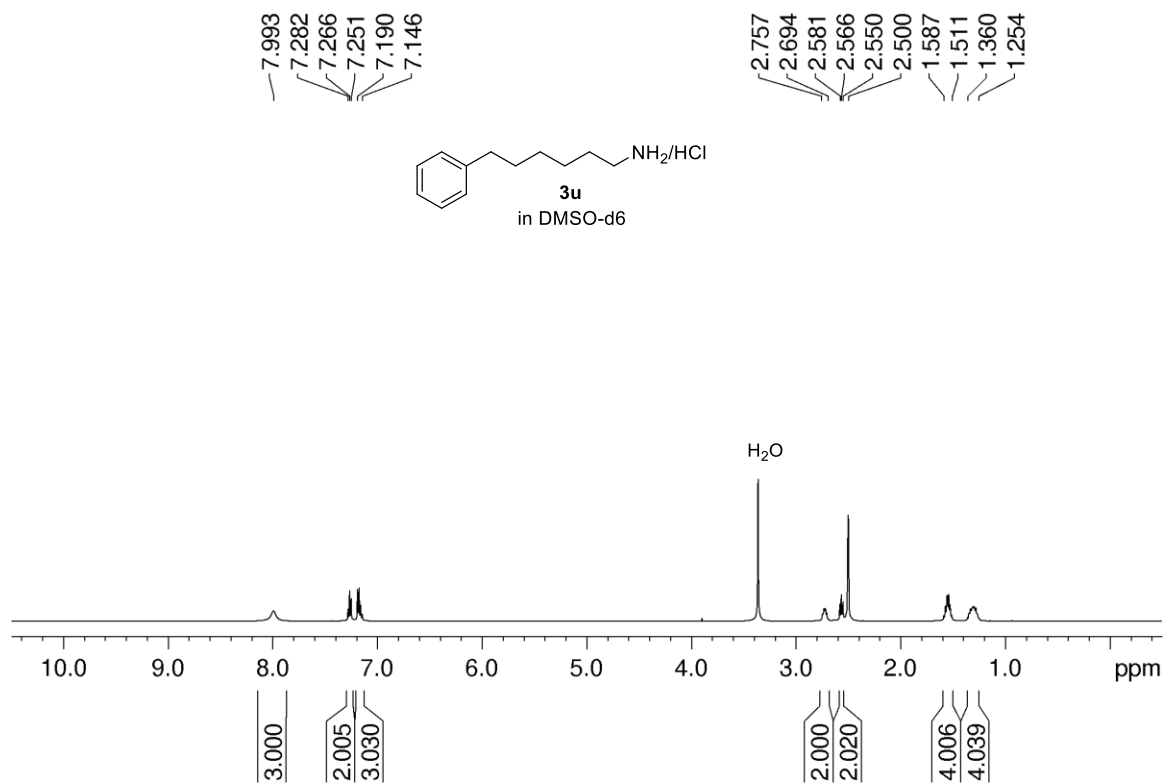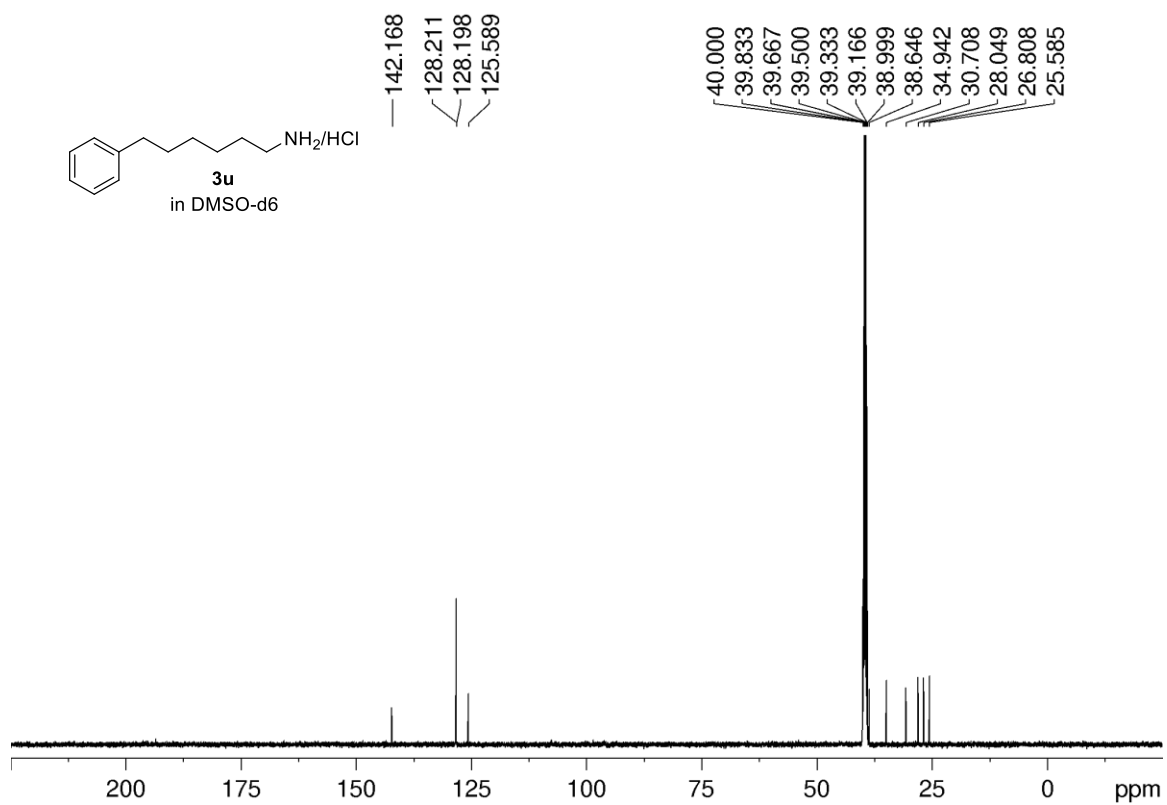

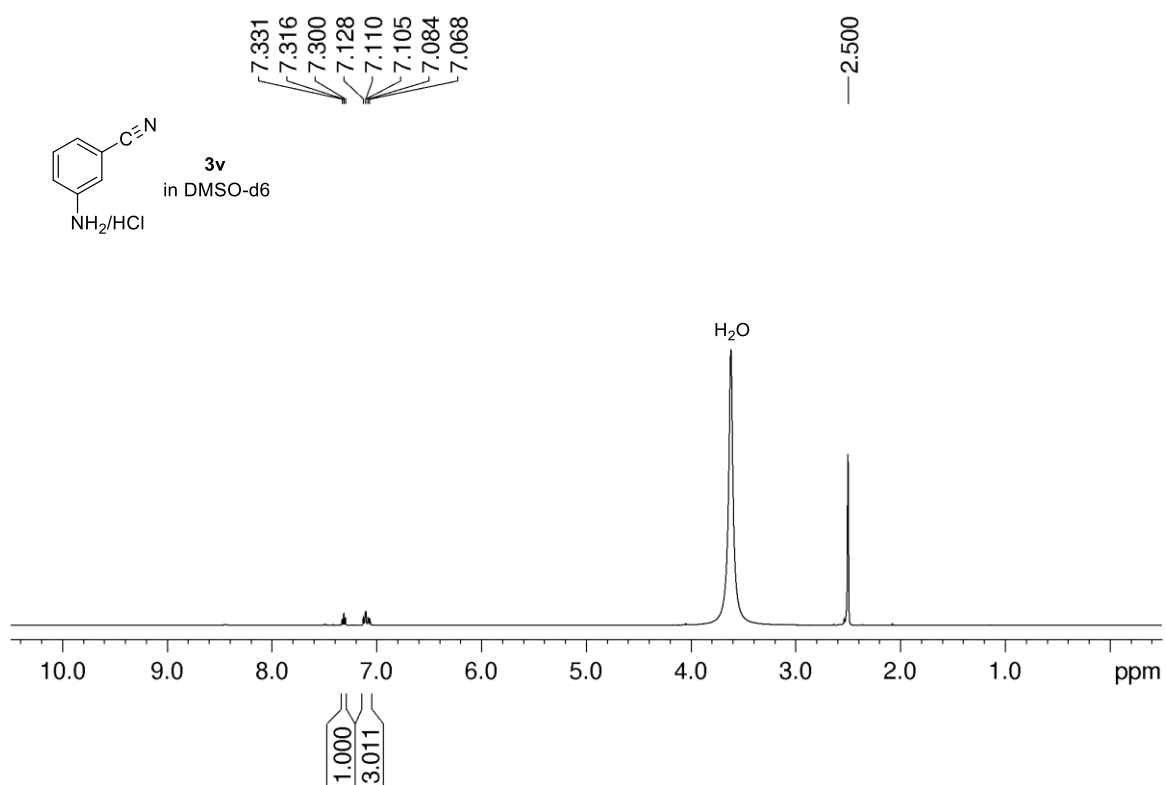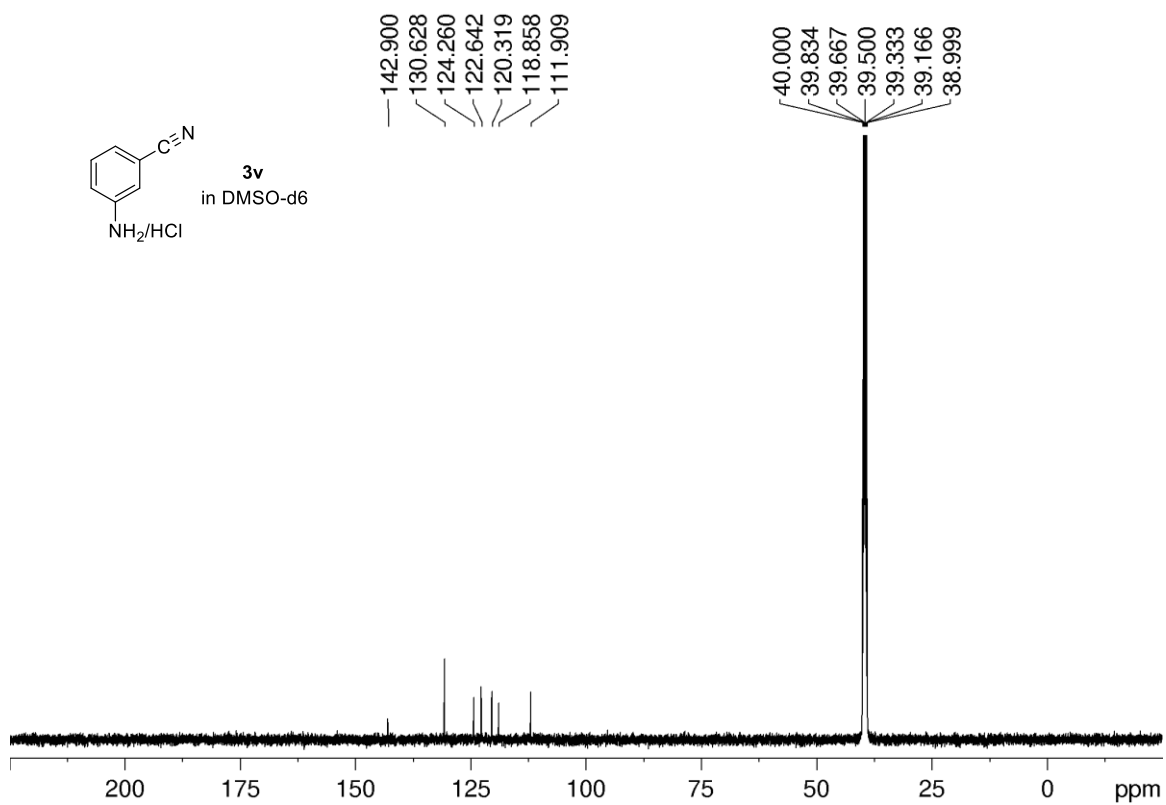

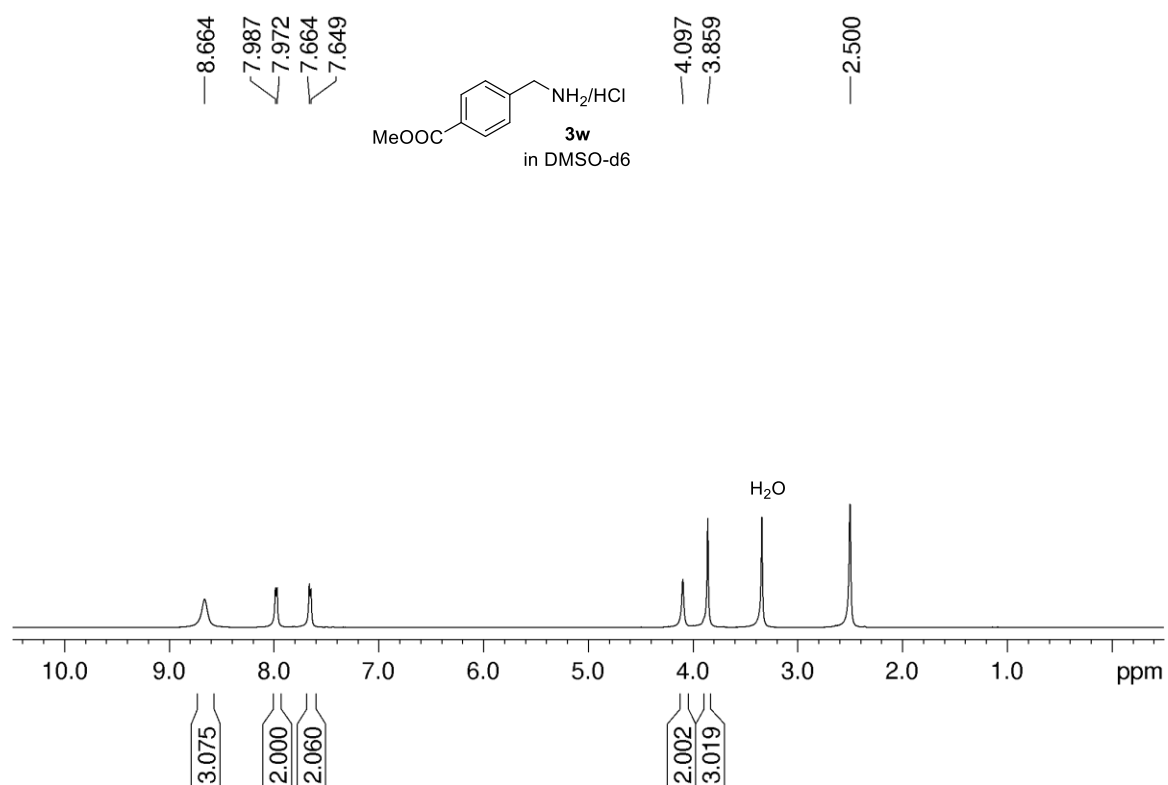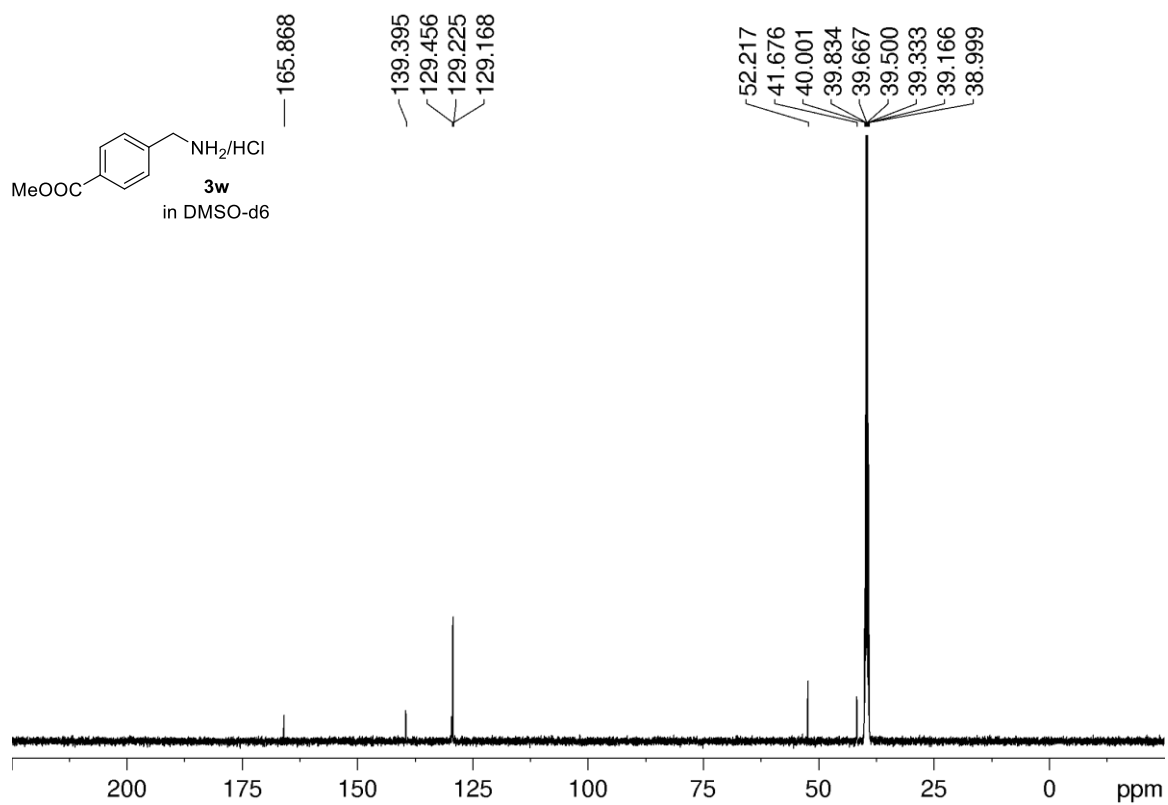



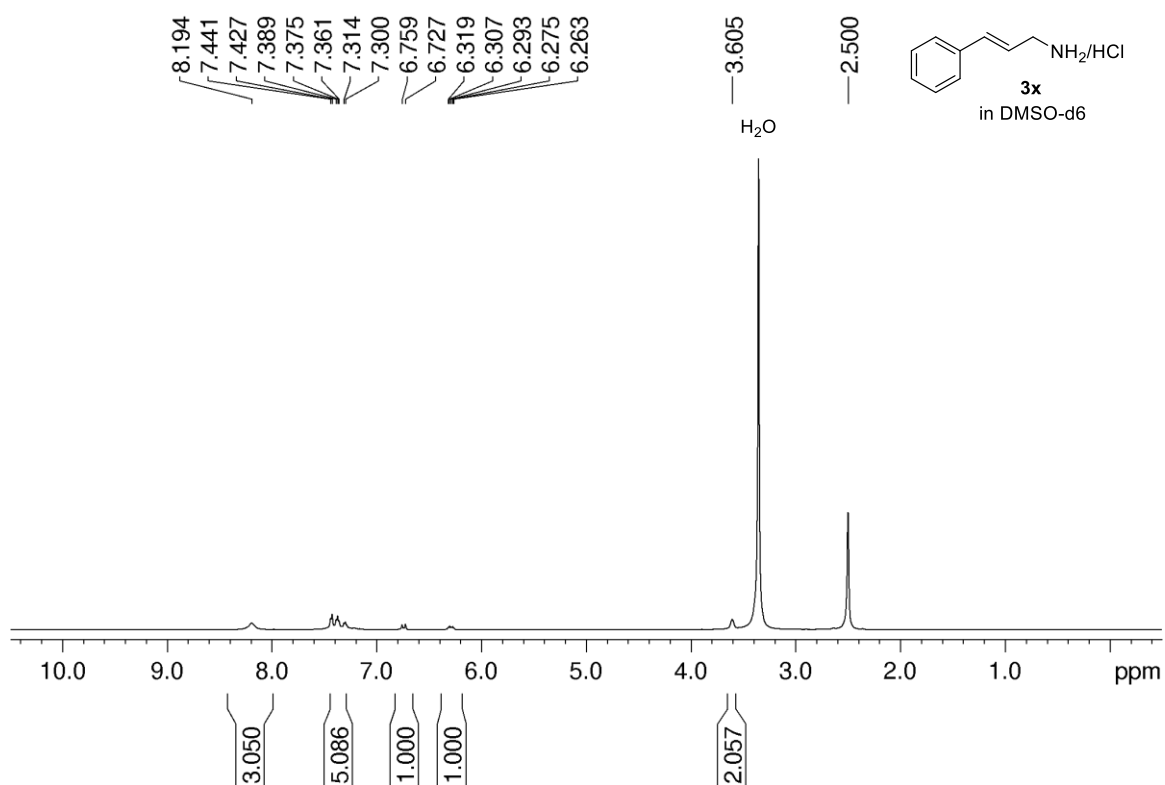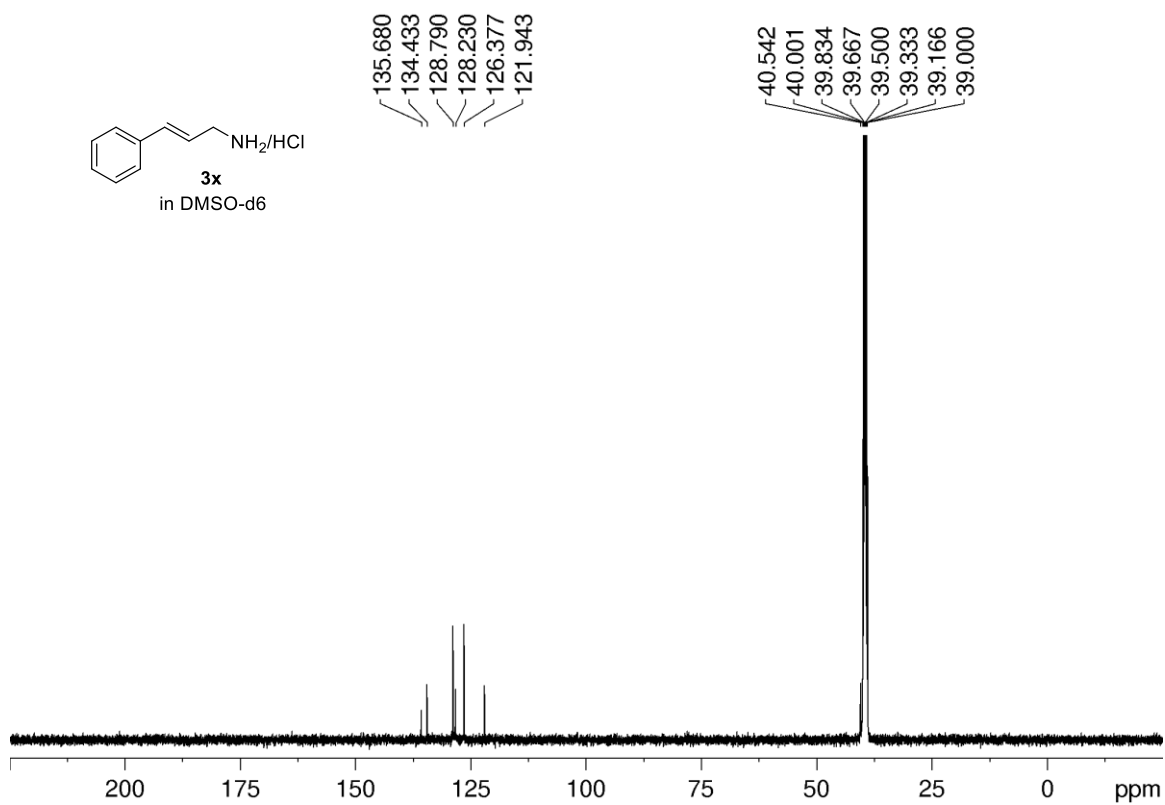

Supplement: d4ob00534a1.pdf [file d4ob00534a1.pdf]
